# Supplementary material for: Effects of actual and imagined music-cued gait training on motor functioning and brain activity in people with multiple sclerosis: protocol of a randomised parallel multicentre trial
Source: PubMed Central journal article supplement — BMJ Open. 2022 Feb 7;12(2):e056666. doi: 10.1136/bmjopen-2021-056666 (PMC8823210; doi:10.1136/bmjopen-2021-056666), 2022-02-07
Supplement: bmjopen-2021-056666.draft_revisions.pdf [file bmjopen-2021-056666.draft_revisions.pdf]

# BMJ Open

BMJ Open is committed to open peer review. As part of this commitment we make the peer review history of every article we publish publicly available.

When an article is published we post the peer reviewers' comments and the authors' responses online. We also post the versions of the paper that were used during peer review. These are the versions that the peer review comments apply to.

The versions of the paper that follow are the versions that were submitted during the peer review process. They are not the versions of record or the final published versions. They should not be cited or distributed as the published version of this manuscript.

BMJ Open is an open access journal and the full, final, typeset and author-corrected version of record of the manuscript is available on our site with no access controls, subscription charges or pay-per-view fees (<http://bmjopen.bmj.com>).

If you have any questions on BMJ Open's open peer review process please email [info.bmjopen@bmj.com](mailto:info.bmjopen@bmj.com)

# BMJ Open

## EFFECTS OF ACTUAL AND IMAGINED MUSIC-CUED GAIT TRAINING ON MOTOR FUNCTIONING AND BRAIN ACTIVITY IN PEOPLE WITH MULTIPLE SCLEROSIS: PROTOCOL OF A RANDOMISED PARALLEL MULTICENTRE TRIAL

|                               |                                                                                                                                                                                                                                                                                                                                                                                                                                                                                                                                                                                                                                                                                                                                                                                                                                                                                                                                                                                                                                                                                                                                                                                                                                                                                                                                                                                                                      |
|-------------------------------|----------------------------------------------------------------------------------------------------------------------------------------------------------------------------------------------------------------------------------------------------------------------------------------------------------------------------------------------------------------------------------------------------------------------------------------------------------------------------------------------------------------------------------------------------------------------------------------------------------------------------------------------------------------------------------------------------------------------------------------------------------------------------------------------------------------------------------------------------------------------------------------------------------------------------------------------------------------------------------------------------------------------------------------------------------------------------------------------------------------------------------------------------------------------------------------------------------------------------------------------------------------------------------------------------------------------------------------------------------------------------------------------------------------------|
| Journal:                      | <i>BMJ Open</i>                                                                                                                                                                                                                                                                                                                                                                                                                                                                                                                                                                                                                                                                                                                                                                                                                                                                                                                                                                                                                                                                                                                                                                                                                                                                                                                                                                                                      |
| Manuscript ID                 | bmjopen-2021-056666                                                                                                                                                                                                                                                                                                                                                                                                                                                                                                                                                                                                                                                                                                                                                                                                                                                                                                                                                                                                                                                                                                                                                                                                                                                                                                                                                                                                  |
| Article Type:                 | Protocol                                                                                                                                                                                                                                                                                                                                                                                                                                                                                                                                                                                                                                                                                                                                                                                                                                                                                                                                                                                                                                                                                                                                                                                                                                                                                                                                                                                                             |
| Date Submitted by the Author: | 21-Aug-2021                                                                                                                                                                                                                                                                                                                                                                                                                                                                                                                                                                                                                                                                                                                                                                                                                                                                                                                                                                                                                                                                                                                                                                                                                                                                                                                                                                                                          |
| Complete List of Authors:     | Seebacher, Barbara; Medical University of Innsbruck, Clinical Department of Neurology; Karl Landsteiner Institute for Interdisciplinary Rehabilitation Research, Muenster<br>Helmlinger, Birgit; Medical University of Graz, Department of Neurology; Medical University of Graz, Department of Neurology, Research Unit for Neuronal Plasticity and Repair<br>Pinter, Daniela; Medical University of Graz, Department of Neurology; Medical University of Graz, Department of Neurology, Research Unit for Neuronal Plasticity and Repair<br>Ehling, Rainer; Clinic for Rehabilitation Münster, Department of Neurology; Karl Landsteiner Institute for Interdisciplinary Rehabilitation Research, Muenster<br>Hegen, Harald; Medical University of Innsbruck, Clinical Department of Neurology<br>Ropele, Stefan; Medical University of Graz, Department of Neurology<br>Reishofer, Gernot; Medical University of Graz, Department of Radiology, Division of Neuroradiology, Vascular and Interventional Radiology<br>Enzinger, Chris; Medical University of Graz, Department of Neurology; Division of Neuroradiology; Department of Radiology<br>Brenneis, Christian; Clinic for Rehabilitation Münster, Department of Neurology; Karl Landsteiner Institute for Interdisciplinary Rehabilitation Research, Muenster<br>Deisenhammer, Florian; Medical University of Innsbruck, Clinical Department of Neurology |
| Keywords:                     | Multiple sclerosis < NEUROLOGY, REHABILITATION MEDICINE, NEUROLOGY                                                                                                                                                                                                                                                                                                                                                                                                                                                                                                                                                                                                                                                                                                                                                                                                                                                                                                                                                                                                                                                                                                                                                                                                                                                                                                                                                   |
|                               |                                                                                                                                                                                                                                                                                                                                                                                                                                                                                                                                                                                                                                                                                                                                                                                                                                                                                                                                                                                                                                                                                                                                                                                                                                                                                                                                                                                                                      |

SCHOLARONE™  
Manuscripts

1  
2  
3 1 **EFFECTS OF ACTUAL AND IMAGINED MUSIC-CUED GAIT TRAINING ON**  
4  
5 2 **MOTOR FUNCTIONING AND BRAIN ACTIVITY IN PEOPLE WITH MULTIPLE**  
6  
7 3 **SCLEROSIS: PROTOCOL OF A RANDOMISED PARALLEL MULTICENTRE**  
8  
9 4 **TRIAL**  
10  
11  
12  
13  
14

15 6 **Barbara Seebacher<sup>1,4</sup>, Birgit Helmlinger<sup>2,3</sup>, Daniela Pinter<sup>2,3</sup>, Rainer Ehling<sup>4, 5</sup>,**  
16  
17 7 **Harald Hegen<sup>1</sup>, Stefan Ropele<sup>2</sup>, Gernot Reishofer<sup>6</sup>, Christian Enzinger<sup>2,3,6</sup>,**  
18  
19 8 **Christian Brenneis<sup>4, 5</sup>, Florian Deisenhammer<sup>1</sup>**  
20  
21  
22  
23  
24

25 10 <sup>1</sup>Clinical Department of Neurology, Medical University of Innsbruck, Austria

26  
27 11 <sup>2</sup>Department of Neurology, Medical University of Graz, Austria

28  
29 12 <sup>3</sup>Department of Neurology, Research Unit for Neuronal Plasticity and Repair, Medical  
30  
31 University of Graz, Austria

32  
33 13  
34 14 <sup>4</sup>Karl Landsteiner Institute for Interdisciplinary Rehabilitation Research, Muenster,  
35  
36 Austria

37  
38 15  
39 16 <sup>5</sup>Department of Neurology, Clinic for Rehabilitation Muenster, Austria

40  
41 17 <sup>6</sup>Department of Radiology, Division of Neuroradiology, Vascular and Interventional  
42  
43 Radiology, Medical University of Graz

44  
45  
46 19

47  
48 20 Correspondence to Dr Barbara Seebacher, Clinical Department of Neurology,

49  
50 21 Medical University of Innsbruck, Anichstrasse 35, 6020 Innsbruck, Austria; phone

51  
52 22 +43.50.504.24363; fax: +43.050.504.24230; email [barbara.seebacher@i-med.ac.at](mailto:barbara.seebacher@i-med.ac.at)

53  
54  
55 23

56  
57 24

58  
59 25 Word count: 3988 words (without Acknowledgements to References sections).

## 26 **ABSTRACT**

### 27 **Introduction**

28 Motor imagery (MI) refers to the mental rehearsal of a physical action without  
29 muscular activity. Our previous studies showed that MI combined with rhythmic-  
30 auditory cues improved walking, fatigue and quality of life (QoL) in people with  
31 multiple sclerosis (pwMS). Largest improvements were seen after music- and  
32 verbally cued MI. It is unclear whether actual cued gait training achieves similar  
33 effects on walking as cued MI in pwMS. Furthermore, in pwMS it is unknown whether  
34 any of these interventions leads to changes in brain activation. The purpose of this  
35 study is therefore to compare the effects of imagined and actual cued gait training  
36 and a combination thereof on walking, brain activation patterns, fatigue, cognitive and  
37 emotional functioning in pwMS.

### 38 **Methods and analysis**

39 A prospective double-blind randomised parallel multicentre trial will be conducted in  
40 132 pwMS with mild to moderate disability. Randomised into three groups, each  
41 participant will receive music-, metronome- and verbal cueing, plus MI of walking (1),  
42 MI combined with actual gait training (2), or actual gait training (3) for 30 minutes, 4x  
43 per week for 4 weeks. Supported by weekly phone calls, participants will practise at  
44 home, guided by recorded instructions. Primary endpoints will be walking speed  
45 (Timed 25-Foot Walk) and distance (2-Minute Walk Test). Secondary endpoints will  
46 be brain activation patterns, fatigue, QoL, MI ability, anxiety, depression, cognitive  
47 functioning, music-induced motivation-to-move, pleasure, arousal and self-efficacy.  
48 Data collection will be performed at baseline, post-intervention and 3-month follow-  
49 up. MRI reference values will be generated using 15 matched healthy controls.

### 50 **Ethics and dissemination**

1  
2  
3 51 This study follows the SPIRIT-PRO Extension. Ethical approval was received from  
4  
5 52 the Ethics Committees of the Medical Universities of Innsbruck (1347/2020) and Graz  
6  
7 53 (33-056 ex 20/21), Austria. Study results will be disseminated via national and  
8  
9 54 international conferences and published in peer-reviewed journals.  
10  
11

12 55 **Trial registration number** DRKS00023978.  
13  
14

15 56

16  
17 57 **Study protocol, first submission, 21.8.2021**  
18

19  
20 58 **Keywords:** Multiple sclerosis, Music, Cues, Motor Imagery, Walking, Fatigue,  
21  
22 59 Rehabilitation, fMRI.  
23  
24

25 60  
26  
27  
28  
29  
30  
31  
32  
33  
34  
35  
36  
37  
38  
39  
40  
41  
42  
43  
44  
45  
46  
47  
48  
49  
50  
51  
52  
53  
54  
55  
56  
57  
58  
59  
60

1  
2  
3 61 **ARTICLE SUMMARY**  
4

5 62 **Strengths and limitations of this study**  
6

- 7  
8 63 • The intervention of this study was developed based on previous study results  
9  
10 64 and involvement of patients with multiple sclerosis (MS). Semi-structured  
11  
12 65 telephone interviews will assist in gaining insight into participants' perspectives  
13  
14 66 of the intervention.  
15  
16  
17 67 • This is the first prospective double-blind randomised parallel multicentre trial to  
18  
19 68 investigate the effects of imagined and actual gait training with music-,  
20  
21 69 metronome- and verbal cueing versus a combination thereof in people with MS  
22  
23 70 (pwMS).  
24  
25  
26 71 • Subjective and objective assessments and functional magnetic resonance  
27  
28 72 imaging will be used as outcome parameters.  
29  
30  
31 73 • Study participants with MS will receive close individual telephone support of  
32  
33 74 their home-based training to facilitate their motor learning.  
34  
35  
36 75 • Study results can be generalised only to pwMS with mild to moderate disability,  
37  
38 76 without cognitive impairment or higher levels of depression or anxiety.  
39  
40  
41 77  
42  
43 78  
44  
45  
46  
47  
48  
49  
50  
51  
52  
53  
54  
55  
56  
57  
58  
59  
60

## 79 INTRODUCTION

80 Multiple Sclerosis (MS) is a chronic inflammatory demyelinating disease of the central  
81 nervous system leading to disability accumulation. People with MS (pwMS) frequently  
82 have impairment in motor, sensory, visual and other functional systems.<sup>1</sup> Walking  
83 impairment and fatigue contribute to a limitation in quality of life (QoL).<sup>2-4</sup> Motor  
84 imagery (MI)<sup>5</sup> and rhythmic-auditory stimulation, or cueing<sup>6-9</sup> are specific  
85 physiotherapy interventions. Rhythmic-auditory cues facilitate cyclical movements,  
86 predominantly gait,<sup>6</sup> which can be provided either by a metronome or music beat,<sup>7 8</sup> a  
87 combination thereof,<sup>9</sup> or by rhythmic verbal cues.<sup>10 11</sup> Cued walking training has been  
88 found to improve walking in people with neurological diseases including MS.<sup>12-16</sup> The  
89 stimulation leads to interactions between sensory and motor processes, referred to  
90 as sensorimotor interaction.<sup>17</sup>

91 MI is the mental execution of a movement without its actual performance<sup>18</sup> and MI of  
92 walking activates brain areas similar to those in actual walking.<sup>19 20</sup> Different imagery  
93 models exist and include individual and group MI, with or without physical practice.<sup>21</sup>  
94 Jeannerod has distinguished between an internal and an external MI perspective.<sup>22</sup>  
95 Further, a visual and a kinaesthetic MI mode have been described.<sup>23</sup> Persons  
96 imagine watching themselves moving with visual MI, with the kinaesthetic mode, they  
97 feel themselves moving.<sup>24</sup>

98 Few small studies have explored rhythmic-cued gait training<sup>15 16</sup> or MI of walking<sup>25 26</sup>  
99 in pwMS, showing promising preliminary results. Results from our previous work  
100 showed superior effects of music- and verbally cued MI over non-cued MI on walking,  
101 fatigue and QoL.<sup>27 28</sup> So far, no studies have compared the effects of cued MI on  
102 walking and cued gait training or a combined cued MI and gait training in pwMS.  
103 Building on the promising results of our previous studies, we furthermore want to learn  
104 whether observed behavioural changes are reflected by changes in brain activation

1  
2  
3 105 patterns. Magnetic resonance imaging (MRI) has been suggested to contribute to the  
4  
5 106 understanding of mechanisms behind motor deficits and functional recovery in  
6  
7 107 pwMS.<sup>29 30</sup> So far, functional MRI studies on motor rehabilitation in pwMS are scarce  
8  
9 108 and,<sup>29 31</sup> to our knowledge, brain activation changes due to specific walking training  
10  
11 109 need to be further explored in pwMS. We expect that MI training may lead to similar  
12  
13 110 neural reorganisation patterns to actual practice.<sup>32</sup>  
14  
15 111 Therefore, the purpose of this study is to explore the effects of actual and imagined  
16  
17 112 rhythmic-cued gait training versus their combination on walking, cognitive and  
18  
19 113 emotional functioning in pwMS. Further aims are to investigate to what extent any of  
20  
21 114 these interventions lead to brain activation changes during a motor or MI task and  
22  
23 115 which changes are specifically associated with behavioural improvements in gait  
24  
25 116 function.

## 30 117 **ALTERNATIVE HYPOTHESES**

31 118 H1: All trainings are effective for walking, brain activations, fatigue, QoL, and emotional  
32  
33 119 and cognitive functioning in pwMS.

34 120 H2: The effects of cued MI combined with cued gait training are superior to those of  
35  
36 121 cued MI and cued gait training alone.

## 41 122 **METHODS AND ANALYSES**

### 42 123 **Study design, setting and timeline**

43 124 This study is designed as a multicentre, randomised, parallel, double-blind controlled  
44  
45 125 trial in pwMS with mild to moderate disability and follows the SPIRIT 2013 and  
46  
47 126 SPIRIT-PRO Extension Checklist (Supplemental File 1). Study results will be  
48  
49 127 reported in accordance with the Consolidated Standards of Reporting Statement  
50  
51 128 (CONSORT).<sup>33</sup> The study will be conducted at the Clinical Department of Neurology,  
52  
53 129 Medical Universities of Innsbruck (Centre 1) and Graz (Centre 3) and Clinic for  
54  
55  
56  
57  
58  
59  
60



1  
2  
3 130 Rehabilitation Muenster (Centre 2), Austria. The expected recruitment phase is from  
4  
5 131 01.02.2021 to 31.03.2023.

7  
8 **132 Patient and public involvement**

9  
10 133 The study intervention was developed based on previous study results and patient  
11  
12 134 involvement. Semi-structured telephone interviews will be used to gain insight into  
13  
14 135 patients' problems with and acceptability of the intervention. Patients' acceptance of  
15  
16 136 the intervention is essential for adherence.

17  
18  
19 **137 Sample size and participants**

20  
21 138 The sample size for this study was calculated using previous study data and Cohen's  
22  
23 139 d effect sizes of the walking distance endpoint, with 95% confidence interval (CI) and  
24  
25 140 corrected estimates of pooled standard deviation. Based on 80% power ( $\beta=0.2$ ),  
26  
27 141  $\alpha=0.025$  and conservative effect sizes of  $d=0.74$ ,<sup>27</sup> a sample size of 37 participants  
28  
29 142 per group is required to detect a between-group difference. Including 15% attrition  
30  
31 143 and making the number divisible by 3, a total sample size of 132 participants results.  
32  
33 144 Thereof, 36 patients will also undergo MRI scanning, while 15 healthy controls will be  
34  
35 145 enrolled to provide reference values for the MRI analyses. Study procedures  
36  
37 146 including screening for eligibility are presented in Supplemental Figure 1 (Flow  
38  
39 147 Diagram).  
40  
41 148 Eligibility criteria for this study are listed in Table 1.

42  
43  
44  
45  
46  
47 **Table 1** Eligibility criteria

| People with MS | Inclusion criteria                                                                                                                                                                           |
|----------------|----------------------------------------------------------------------------------------------------------------------------------------------------------------------------------------------|
|                | <ul style="list-style-type: none"> <li>• any MS phenotype according to the revised McDonald's criteria<sup>34 35</sup></li> <li>• aged 18 years or older</li> <li>• any ethnicity</li> </ul> |

- disability status score on the Expanded Disability Status Scale (EDSS)<sup>36</sup> of 2.0 to 5.0
- stable disease; no clinical evidence of disease activity
- ability to speak and understand German language

**Exclusion criteria**

- significant concomitant diseases (such as malignant diseases, other neurological or psychiatric disorders, musculoskeletal problems affecting walking, pain, uncorrected visual or hearing impairment)
- cognitive impairment as defined by a MoCA cut-off score of 26/30 (<26 = impaired cognition)<sup>37</sup>
- anxiety or depression as signified by a HADS anxiety<sup>38</sup> or depression subscale score of 11/21<sup>39</sup> or suicidality as evaluated by a narrative screening<sup>40</sup>
- pregnancy
- relapse of MS within the last three months before the study
- any medication initiation or change (including corticosteroids) or any physiotherapy change or inpatient rehabilitation within three months prior to the study
- any change of symptomatic treatment affecting walking (medication or physiotherapy) or of disease modifying treatment during the study will lead to an exclusion of the participant from further analysis

|                                   |                                                                                                                                                                                                                                                                                                                                                                                                                                                                                                                        |
|-----------------------------------|------------------------------------------------------------------------------------------------------------------------------------------------------------------------------------------------------------------------------------------------------------------------------------------------------------------------------------------------------------------------------------------------------------------------------------------------------------------------------------------------------------------------|
| <b>Healthy controls</b>           | <ul style="list-style-type: none"> <li>• age- and gender-matched</li> <li>• without any history of neurological, psychiatric, or orthopaedic disorders</li> </ul>                                                                                                                                                                                                                                                                                                                                                      |
| <b>MRI/fMRI contraindications</b> | <ul style="list-style-type: none"> <li>• metallic or electricity conducting implants or prostheses (cardiac pacemaker, insulin pump, middle-ear implants, heart valve or hip prostheses, artificial teeth, hearing aid etc.) in or on the body</li> <li>• non-removable metal parts (coil, braces etc.) or metal shrapnel in or on the body</li> <li>• tattoos in the head or neck area, nicotine plasters or cosmetic eye modifications</li> <li>• pregnancy</li> <li>• epilepsy</li> <li>• claustrophobia</li> </ul> |

150 EDSS, Expanded Disability Status Scale;<sup>36</sup> HADS, Hospital and Anxiety and

151 Depression Scale;<sup>41</sup> MoCA, Montreal Cognitive Assessment;<sup>42</sup> MS, multiple sclerosis

## 152 **Recruitment, randomisation and blinding**

153 Information brochures and invitations for study participation will be displayed in the  
 154 study Centres 1-3 and on the Austrian MS Society website, with pwMS notified about  
 155 the study by clinical department staff. Written informed consent will be obtained from  
 156 all participants. Healthy controls will be enrolled at Centre 3 only.

157 Patients fulfilling the eligibility criteria will be randomised into one of three groups with  
 158 stratified blocked randomisation performed by an independent researcher at Centre 1  
 159 using an online software-based random number generator (Sealed Envelope,  
 160 London, UK), blocks of prespecified size and 1:1:1 allocation. Stratification will be

1  
2  
3 161 performed according to relevant predictive factors for a change in walking i.e.,<sup>43</sup> age  
4  
5 162 (<40, ≥40), gender (female, male) and disability (EDSS<sup>36</sup> 2.0–3.5, 4.0–5.0).

6  
7 163 Sequentially numbered sealed opaque envelopes including group allocation numbers  
8  
9 164 for groups 1-3 will be fabricated for each stratum. Allocation concealment will be  
10  
11 165 performed to avoid allocation bias, assessors blinded to participants' group allocation  
12  
13 166 and participants unaware of the study hypotheses.

### 167 **Intervention**

168 Three intervention groups will receive home-based kinaesthetic MI and/or gait  
19  
20 169 training with music-, metronome- and verbal cueing for a total of 30 minutes, 4 times  
21  
22 170 per week, for 4 weeks. Participants will receive cued MI (Group 1), combined cued MI  
23  
24 171 and gait training (Group 2) or cued gait training (Group 3).

25  
26 172 An audio-mix has been created specifically for this study (Audacity®. Version 3.0.0)<sup>44</sup>  
27  
28 173 for download on participants' electronic devices or available as study CDs (Group 1).  
29  
30 174 Instrumental motivational music at a regular beat in a 2/4 or 4/4 metre and strong ON  
31  
32 175 and OFF beat patterns (i.e., with every first or first and third music beats stressed)  
33  
34 176 will be utilised.<sup>6 45 46</sup> Additionally, metronome cues will accentuate the music beat and  
35  
36 177 tempo and support gait synchronisation with the beat. Verbal cueing will be employed  
37  
38 178 as a reminder of the task to practise and aid participants' focus on the respective  
39  
40 179 body parts e.g., the feet.

41  
42 180 Suitable rhythmical sequences at 80-120 beats per minute will be cut and mixed with  
43  
44 181 instructions on MI or gait training. Rhythmic-verbal cues will accentuate the cueing  
45  
46 182 intermittently, for example using "step-step" or "toe-off",<sup>47</sup> with different walking tasks  
47  
48 183 used. Familiarisation will occur individually with the rhythmic-cued MI and gait training  
49  
50 184 as previously recommended.<sup>21 48</sup> The audio mix will be changed weekly to gradually  
51  
52 185 increase the tempo and facilitate adherence. The PETTLEP approach to MI will be  
53  
54 186 applied, involving the "Physical, Environmental, Task, Timing, Learning, Emotional,

1  
2  
3 187 and Perspective” components of MI.<sup>49</sup> Using the template for intervention description  
4  
5 188 and replication (TIDieR) checklist,<sup>50</sup> detailed information on the PETTLEP approach  
6  
7  
8 189 and intervention is provided in Supplemental Table 1. In Figure 1, key aspects of the  
9  
10 190 intervention are presented.

11  
12 191 *Figure 1 around here*

13  
14 192 **Figure 1** Key elements of the intervention in the three groups

15  
16  
17 193 Practice frequency will be noted in a diary with weekly reports on participants’ practice  
18  
19 194 frequency prepared. Weekly phone calls will be used in the homebased training  
20  
21 195 support of all participants, additionally at 4-weeks post-intervention. Additional phone  
22  
23 196 call support will be provided upon request by the intervention providers. The content of  
24  
25 197 the semi-structured telephone interviews during and post-intervention is presented in  
26  
27 198 Figure 2.

28  
29  
30 199 *Figure 2 around here*

31  
32 200 **Figure 2** Content of semi-structured interviews

33  
34 201 **Data collection**

35  
36  
37 202 Demographic disease specific data will be collected as detailed in Table 2. Clinical data  
38  
39 203 will be collected by trained and blinded assessors (physiotherapists, occupational  
40  
41 204 therapists, sports scientists, and psychologists). A schedule of the study procedures is  
42  
43  
44 205 provided in Table 2.  
45  
46  
47  
48  
49  
50  
51  
52  
53  
54  
55  
56  
57  
58  
59  
60

206 **Table 2** Schedule of study procedures

|                                              | STUDY PERIOD |            |                        |                                  |                                |                           |
|----------------------------------------------|--------------|------------|------------------------|----------------------------------|--------------------------------|---------------------------|
|                                              | Enrolment    | Allocation | Post-allocation        |                                  |                                |                           |
|                                              | Screening    |            | Baseline test<br>Day 1 | Post-intervention test<br>Week 4 | Follow-up phone call<br>Week 8 | Follow-up test<br>Month 3 |
| TIMEPOINT                                    | $-T_1$       | $0$        | $T_1$                  | $T_2$                            | $T_3$                          | $T_4$                     |
| <b>ENROLMENT</b>                             |              |            |                        |                                  |                                |                           |
| Eligibility screen                           | X            |            |                        |                                  |                                |                           |
| Informed consent                             | X            |            |                        |                                  |                                |                           |
| Allocation                                   |              | X          |                        |                                  |                                |                           |
| <b>INTERVENTIONS</b>                         |              |            |                        |                                  |                                |                           |
| <i>Music-cued MI group</i>                   |              |            | ←————→                 |                                  |                                |                           |
| <i>Music-cued MI and gait training group</i> |              |            | ←————→                 |                                  |                                |                           |
| <i>Music-cued gait training group</i>        |              |            | ←————→                 |                                  |                                |                           |

|                                                                                                                 |   |   |   |  |   |
|-----------------------------------------------------------------------------------------------------------------|---|---|---|--|---|
| <b>OUTCOMES (ASSESSMENTS)</b>                                                                                   |   |   |   |  |   |
| <b>Baseline variables</b>                                                                                       |   |   |   |  |   |
| <i>Demographics (age, gender)</i>                                                                               | X |   |   |  |   |
| <i>Clinical characteristics (EDSS, MS phenotype, disease duration, disease modifying treatment<sup>1</sup>)</i> | X |   |   |  |   |
| <i>Global cognitive impairment (MoCA test)</i>                                                                  | X |   | X |  | X |
| <i>Anxiety and depression (HADS)</i>                                                                            | X |   | X |  | X |
| <i>Suicidality (narrative screening)</i>                                                                        | X |   | X |  | X |
| <b>Primary outcomes</b>                                                                                         |   |   |   |  |   |
| <i>Walking speed and distance (T25FW, 2MWT)</i>                                                                 |   | X | X |  | X |
| <b>Secondary outcomes</b>                                                                                       |   |   |   |  |   |
| <i>Brain activation patterns (fMRI)</i>                                                                         |   | X | X |  |   |
| <i>MS related fatigue (NFI-MS)</i>                                                                              |   | X | X |  | X |
| <i>Health-related QoL (MusiQoL)</i>                                                                             |   | X | X |  | X |
| <i>MI ability (KVIQ-10, mental chronometry test)</i>                                                            |   | X | X |  | X |
| <i>Cognitive functioning (SDMT)</i>                                                                             |   | X | X |  | X |

|                                                                                                                      |  |  |        |   |   |   |
|----------------------------------------------------------------------------------------------------------------------|--|--|--------|---|---|---|
| <i>Music-induced motivation in exercise (BMRI-II)</i>                                                                |  |  | X      | X |   | X |
| <i>Music-induced pleasure &amp; arousal (SAM)</i>                                                                    |  |  |        | X |   |   |
| <i>MS specific self-efficacy (USE-MS)</i>                                                                            |  |  |        |   |   |   |
| <i>Adverse events and adverse reactions (log)</i>                                                                    |  |  |        | X | X | X |
| <i>Falls (log)</i>                                                                                                   |  |  |        | X | X | X |
| <i>Acceptability of the intervention, adherence and coping (checklist, weekly semi-structured phone interviews)</i>  |  |  | ←————→ |   |   |   |
| <i>Self-report health status and feedback on the study intervention (follow-up semi-structured phone interviews)</i> |  |  |        |   | X |   |

1Three categories of disease modifying treatment (DMT): (1) no DMTs; (2) lowly effective DMTs: interferon-b 1a and 1b, pegylated interferon-b 1a, glatiramer acetate, dimethyl fumarate, teriflunomide, azathioprine, intravenous immunoglobulins; (3) highly effective DMTs: alemtuzumab, cladribine, fingolimod, natalizumab, ocrelizumab, cyclophosphamide, mitoxantrone, rituximab.

BMRI-II, Brunel Music-Rating Inventory-II; EDSS, Expanded Disability Status Scale; fMRI, functional magnetic resonance imaging; HADS, Hospital Anxiety and Depression Scale; KVIQ-10, Kinaesthetic and Visual Imagery Questionnaire, short version; MI, motor imagery; MoCA, Montreal Cognitive Assessment; MS, multiple sclerosis; MusiQoL, Multiple Sclerosis International Quality of Life; NFI-



1  
2  
3  
4  
5  
6  
7  
8  
9  
10  
11  
12  
13  
14  
15  
16  
17  
18  
19  
20  
21  
22  
23  
24  
25  
26  
27  
28  
29  
30  
31  
32  
33  
34  
35  
36  
37  
38  
39  
40  
41  
42  
43  
44  
45  
46

213 MS, Neurological Fatigue Index - Multiple Sclerosis; SAM, Self-Assessment Manikin; SDMT, Symbol Digit Modalities Test; T25FW,  
214 Timed 25-Foot Walk; USE-MS, Unidimensional Self-Efficacy Scale for Multiple Sclerosis; 2MWT, 2-Minute Walk Test.

For peer review only

## 215 **Primary outcomes**

216 Primary outcomes are walking speed as assessed by the Timed 25-Foot Walk  
217 (T25FW)<sup>51</sup> and walking distance as assessed by the 2-Minute Walk Test (2MWT).<sup>52</sup>  
218 <sup>53</sup> For the T25FW, patients will be asked to walk a marked distance of 25 feet (7.62  
219 metres) as quickly as possible, though safely, with an assistive device as required.<sup>54</sup>  
220 Scoring is achieved by taking the average of two trials. Excellent psychometric  
221 properties of the T25FW have been demonstrated.<sup>55 56</sup> A 20% change in the T25FW  
222 is interpreted as a clinically significant difference in walking speed.<sup>57</sup>  
223 The 2MWT will be performed as outlined in the American Thoracic Society Guidelines,  
224 which were developed for the 6-Minute Walking Test<sup>58</sup> and adapted by international  
225 experts from the NIH Toolbox.<sup>59</sup> For the 2MWT, excellent validity<sup>60 52</sup> and test-retest  
226 reliability have been found.<sup>61</sup> A 20% change represents a clinically significant  
227 difference in walking distance.<sup>62</sup>

## 228 **Secondary outcomes**

### 229 Brain activation patterns

230 MRI data will be acquired at T<sub>1</sub> and T<sub>2</sub> on a 3 Tesla scanner (Siemens PRISMA,  
231 Siemens Healthcare Erlangen) using a 20-channel head coil. The MRI protocol  
232 includes a high-resolution structural three-dimensional (3D) T1-weighted MPRAGE  
233 sequence with 1 mm isotropic resolution (repetition time (TR) = 1900 ms, echo time  
234 (TE) = 2.7 ms) and a T2-weighted sequence (1mm isotropic, TR = 2800 ms, TE =  
235 405 ms). A 3D fluid-attenuated inversion recovery (FLAIR) sequence (1 mm isotropic,  
236 TR = 5000 ms, TE = 393 ms) is administered to assess hyperintense T2-lesion load  
237 in patients. Additionally, diffusion tensor imaging (DTI; 1.5 mm isotropic, TR = 3318  
238 ms, 64 directions), task-related fMRI (2 mm isotropic; TR = 2500 ms; TE = 30; 198  
239 volumes, field of view = 192 × 192 mm<sup>2</sup>, acquisition time = 8.31 minutes) and resting-  
240 state fMRI (rsfMRI; 2 mm isotropic; TR = 1000 ms; TE = 35; field of view = 256 × 256

1  
2  
3 241 mm<sup>2</sup>, acquisition time = 5.20 minutes) will be performed. The scans will take  
4  
5 242 approximately 35 minutes in total.  
6  
7  
8 243 Task-related fMRI: experimental stimuli and procedure  
9  
10 244 The block-fMRI task will comprise a music-cued bipedal ankle movement on a  
11  
12 245 treadmill i.e., alternating dorsi- and plantarflexion of both feet <sup>63</sup>, a corresponding  
13  
14 246 music-cued MI, and a listen-to-music-only condition. Four instrumental music-  
15  
16 247 excerpts were selected as cues based on the same criteria used in the interventions.<sup>6</sup>  
17  
18 248 Pace is held constant at 110 BPM for all cues. Each condition is repeated four times,  
19  
20 249 and presented in a pseudo-randomised order, so that no condition or music-cue  
21  
22 250 occurs twice in a row, and identical music-cues never run successively.  
23  
24 251 Before each condition, a coloured symbol cue appears in the centre of the screen for  
25  
26 252 2.5 seconds, indicating the subsequent condition (orange feet for movement, blue  
27  
28 253 think bubble for MI, violet ear for music-only condition; Figure 3a). At the start of each  
29  
30 254 condition, a fixation cross in the corresponding colour appears and the music starts.  
31  
32 255 Participants are instructed to perform the ankle movement at the pace of the music,  
33  
34 256 starting with the right foot, and concentrate on the music beat during the music-only  
35  
36 257 condition. After 22.5 seconds, the fixation cross turns black, indicating a period of  
37  
38 258 total rest for 15 seconds (Figure 3b).  
39  
40  
41  
42  
43  
44

45 259 *Figure 3 around here*

46  
47 260 **Figure 3** Schematic representation of the block fMRI-paradigm

48  
49 261 Figure legend: a) Presentation of each condition (music-cued movement, music-cued  
50  
51 262 motor imagery, music-only), the corresponding symbol cues and the treadmill used  
52  
53 263 for the study. b) Timeline of the paradigm.

54  
55 264 Prior to entering the scanner, participants will practice the paradigm. Throughout the  
56  
57 265 whole paradigm, participants are instructed to fixate on the cross, not to move their  
58  
59 266 heads, to relax their entire body, except their feet during the movement condition. To  
60

1  
2  
3 267 decrease stimulus-correlated motion, participants' heads are fixed with foam-  
4  
5 268 cushions and their knees flexed to approximately 135° using a soft roll and cushion  
6  
7 269 beneath their knees (Figure 3a).<sup>63</sup> Vision is corrected with prism lenses if necessary.  
8  
9  
10 270 During the paradigm, participants are observed with correct and incorrect movements  
11  
12 271 recorded. After the scan, participants are asked to complete a short questionnaire on  
13  
14 272 whether they recognised the songs (yes/no), liked the music-cues and found them  
15  
16 273 motivating to move (both items: 7-point Likert scales). Three items will ask about the  
17  
18 274 MI conditions (7-point Likert scale): the perceived MI difficulty and the extent to which  
19  
20 275 they have "seen" or "felt" the MI (similar to the KVIQ-10 response format).  
21  
22

#### 23 276 Fatigue

24  
25  
26 277 The Neurological Fatigue Scale - Multiple Sclerosis (NFI-MS) will be used to assess  
27  
28 278 fatigue, including subscales of physical and cognitive fatigue, relief through daytime  
29  
30 279 sleep or rest and abnormal nighttime sleep and sleepiness.<sup>64 65</sup> A summary score of  
31  
32 280 items 1-7, 9 and 11-12 is generated. A 4-point Likert scale is used, from 0 = 'strongly  
33  
34 281 disagree' to 3 = 'strongly agree', where higher scores represent more severe fatigue.  
35  
36 282 The NFI-MS displayed good validity<sup>65</sup> and reliability.<sup>65</sup>  
37  
38

#### 39 283 Health-related quality of life

40  
41  
42 284 The 31-item Multiple Sclerosis International Quality of Life questionnaire (MusiQoL)<sup>66</sup>  
43  
44 285 <sup>67</sup> has been chosen to record patient-reported health-related QoL (HRQoL). Nine  
45  
46 286 dimensions of HRQoL are assessed: everyday activities, psychological wellbeing,  
47  
48 287 symptoms, relationships with friends, family and the health care system, emotional  
49  
50 288 and sex life, coping and rejection. A 5-point Likert scale from 1 = 'never/not at all' to 5  
51  
52 289 = 'always/a lot' is used with reverse scoring of negatively worded items. Nine domain  
53  
54 290 scores and the global index are standardised on a 0-100 scale, where 100  
55  
56 291 represents the best HRQoL. A good validity <sup>68</sup> and reliability have been shown for the  
57  
58  
59 292 MusiQoL.<sup>66 67</sup>  
60

1  
2  
3 293 MI ability  
4

5 294 MI ability should be assessed using at least two different approaches,<sup>69</sup> hence the  
6  
7 295 Kinaesthetic and Visual Imagery questionnaire,<sup>70 71</sup> utilising a German short version  
8  
9 296 (KVIQ-G-10)<sup>70</sup> and a mental chronometry (MC) test.<sup>72-74</sup>  
10  
11

12 297 The KVIQ-(G)10 is patient-reported and assessor-administered and measures visual  
13  
14 298 and kinaesthetic MI ability in neurological patients using five items.<sup>71</sup> Scoring is  
15  
16 299 achieved using a 5-point Likert scale from 1 = 'no image' to 5 = 'image as clear as  
17  
18 300 seeing' (visual subscale) and from 1 = 'no sensation' to 5 = 'as intense as executing  
19  
20 301 the action' (kinaesthetic subscale). The KVIQ-G-10 has excellent psychometric  
21  
22 302 properties.<sup>70</sup>  
23  
24

25  
26 303 MC tests are based on the theory of functional equivalence between MI and actual  
27  
28 304 movement.<sup>49 75 76</sup> Excellent temporal equivalence has been found for corresponding  
29  
30 305 imagined and real movements.<sup>74 77</sup> MC evaluation will be at a comfortable tempo on a  
31  
32 306 marked 6-metre path.<sup>72-74</sup> The "index of deviation from isochrony" will be calculated to  
33  
34 307 quantify the discrepancy between imagined and real walking: deviation index =  
35  
36 308 absolute value (1-(MI/motor execution)).<sup>78</sup> Values close to zero are indicative of high  
37  
38 309 MI ability.<sup>78</sup>  
39  
40

41  
42 310 Depression, anxiety, and suicidality  
43

44 311 The German version<sup>79</sup> of the Hospital Anxiety and Depression Scale (HADS)<sup>41</sup> and  
45  
46 312 narrative screening for suicidality<sup>40</sup> adapted from item 9 of the Beck Depression  
47  
48 313 Inventory<sup>80</sup> and a suicidality screening checklist<sup>81</sup> will be employed for screening. The  
49  
50 314 14-item HADS assesses patient-reported anxiety and depression during the previous  
51  
52 315 two weeks. Anxiety or depression will be signified by a HADS anxiety<sup>38</sup> or depression  
53  
54 316 subscale score of 11/21 points<sup>39</sup> or suicidality as evaluated by a narrative screening  
55  
56 317 <sup>40</sup>. Good validity, reliability<sup>82</sup> and a bifactorial structure has been shown for the  
57  
58  
59  
60 318 German HADS.<sup>79</sup>

1  
2  
3 319 Overall cognitive impairment  
4

5 320 Overall cognitive impairment (attention and concentration, executive functions,  
6  
7 321 memory, language, visuo-constructive abilities, conceptual thinking, arithmetic and  
8  
9 322 orientation) will be assessed using the German Montreal Cognitive Assessment  
10  
11 323 (MoCA).<sup>42 83</sup> The highest possible score is 30 points; values  $\geq 26$  are considered  
12  
13 324 normal,<sup>37</sup> with good psychometric properties demonstrated.<sup>37 84 85</sup>  
14

15  
16 325 Motivational qualities of music in exercise settings  
17

18  
19 326 The 6-item Brunel Music Rating Inventory-2 (BMRI-2)<sup>86</sup> has been chosen to assess  
20  
21 327 the music-induced motivation to move on a 7-point Likert scale. Music pieces selected  
22  
23 328 from the audio-mix will be played to participants (in relevant 90-second excerpts).<sup>86</sup>  
24  
25 329 Motivational properties of the musical rhythm, style, melody, tempo, instrumentation  
26  
27 330 and beat during physical exercise will be patient-rated. The BMRI-2 has shown good  
28  
29 331 validity and reliability.<sup>86 87</sup>  
30

31  
32 332 Music-induced pleasure and arousal  
33

34  
35 333 The Self-Assessment Manikin (SAM) will be used to measure the emotional  
36  
37 334 responses of pleasure and arousal to the music selected for the study intervention.<sup>88</sup>  
38  
39 335 <sup>89</sup> The SAM consists of two series of pictograms, each of which displays a dimension  
40  
41 336 on a 9-point scale<sup>88 89</sup>. SAM validations have demonstrated good to excellent  
42  
43 337 validity<sup>89 90</sup> and reliability<sup>91</sup>.  
44

45  
46 338 Self-efficacy  
47

48  
49 339 The validated German version<sup>92</sup> of the Unidimensional Self-Efficacy Scale for MS  
50  
51 340 (USE-MS)<sup>93</sup> will be used to assess self-efficacy. For this patient-reported 12-item  
52  
53 341 questionnaire using a 4-point Likert scale, excellent psychometric properties have  
54  
55 342 been seen.<sup>92 93</sup>  
56  
57  
58  
59  
60

1  
2  
3 343 Cognitive function  
4  
5 344 Cognitive function including attention, visual scanning, working memory and  
6  
7 345 psychomotor speed will be measured using the Symbol Digit Modalities Test  
8  
9  
10 346 (SDMT)<sup>94</sup>. Patients will be asked to assign the numbers 1 through 9 to nine different  
11  
12 347 symbols within 90 seconds. The number of maximum possible substitutions is 110.  
13  
14 348 Excellent construct,<sup>95</sup> predictive <sup>96</sup> and discriminatory validity<sup>97</sup> and test-retest  
15  
16 349 reliability<sup>98</sup> for the SDMT is demonstrated in pwMS.

17  
18  
19 350 Falls, adherence, and acceptability of the intervention

20  
21 351 Falls and adverse events will be recorded in structured logs, the relationship with the  
22  
23 352 intervention evaluated and treatment provided if necessary. which is covered by an  
24  
25 353 indemnity insurance policy. Semi-structured telephone interviews will gain information  
26  
27 354 on adherence and acceptability. Adherence will be monitored using a self-report  
28  
29 355 checklist (Figure 2).

### 30 31 32 33 356 **Data management**

34  
35 357 As for confidentiality, the Austrian, Tyrolean and Styrian Data Protection Acts will be  
36  
37 358 adhered to, and personal data codified by a participant ID. Only the research team will  
38  
39 359 have access to the data. Data will be only used for the purposes for which they were  
40  
41 360 collected and saved on a password-protected computer. Data will be digitised in double  
42  
43 361 entry with double coding of interview data performed. Quality assurance measures  
44  
45 362 such as spot checks of value ranges and field types and logical checks will be  
46  
47 363 performed.

### 48 49 50 51 364 **Data analyses**

52  
53 365 Statistical data analyses

54  
55 366 All statistical analyses employ IBM SPSS software, release 27.0 (IBM Corporation,  
56  
57 367 Armonk, NY, USA) and GraphPad Prism 9, San Diego, California. A two-tailed p-value  
58  
59 368 <0.05 will signify statistical significance. Including all cases as originally allocated,

1  
2  
3 369 intention-to-treat analysis will be performed. Descriptive statistics will be used as  
4  
5 370 appropriate and continuous data tested for normal distribution using the Shapiro Wilk test,  
6  
7 371 Q-Q-plots and histograms. For between-group comparisons at baseline, One-Way  
8  
9 372 Analysis of Variance (ANOVA), Kruskal Wallis and Chi square tests will be used.  
10  
11  
12 373 Mixed Design ANOVA test assumptions will be tested for e.g., sphericity (Mauchly's  
13  
14 374 test) and homogeneity of variance (Levene's test), and standard correction  
15  
16 375 procedures applied where appropriate. For continuous variables (T25FW, 2MWT, MC  
17  
18 376 and SDMT), a 2-Way Mixed Design ANOVA will be conducted, using time as within-  
19  
20 377 subject factor and group as between-subject factor, and the three DMT categories as  
21  
22 378 covariates (no DMT; lowly effective DMT; highly effective DMT). Post-hoc Bonferroni  
23  
24 379 adjustment performed as appropriate. For categorical data (NFI-MS, MusiQoL, KVIQ-  
25  
26 380 10, HADS, MoCA, BMRI-2, SAM, and USE-MS), calculation of differences between  
27  
28 381 post-intervention and baseline values will be followed by Kruskal Wallis and Dunn's  
29  
30 382 multiple comparisons tests.

### 36 383 Structural MRI analyses

37  
38 384 Using the Statistical Parametric Mapping - Lesion segmentation toolbox, T2-lesion  
39  
40 385 load (T2-LL) will be assessed on T2-FLAIR images by the lesion prediction  
41  
42 386 algorithm<sup>99</sup> controlled by a single experienced rater. Individual binarised T2-LL masks  
43  
44 387 will be registered to MNI and lesion probability mapping performed to identify the  
45  
46 388 lesion locations, using FSL randomise. After lesion filling with the FSL lesion filling  
47  
48 389 toolbox, brain volumes will be assessed from T1-weighted MPRAGE images using  
49  
50 390 SIENAX.

### 54 391 Functional MRI analyses

55  
56 392 Individual resting state and task-fMRI data will be pre-processed using FEAT  
57  
58 393 (FMRIB's Expert Analysis Tool, v 6.0, part of FSL v 6.0.<sup>100</sup> Pre-processing includes:  
59  
60



1  
2  
3 394 motion correction using MCFLIRT, brain extraction, spatial smoothing using a  
4  
5 395 Gaussian kernel of FWHM (full width at half maximum) of 5 mm,<sup>101</sup> high pass  
6  
7 396 temporal filtering using a cut-off of 150 s (0.007 Hz), linear registration to main  
8  
9  
10 397 structural image (BBR) and nonlinear registration warp resolution of 10 mm. High-  
11  
12 398 resolution T1 scans are used for image registration.

13  
14 399 First-level task fMRI analyses will be performed for each participant, assessing  
15  
16 400 activation patterns of the three conditions (movement, MI, music-only) and related  
17  
18 401 contrasts. Higher-level analyses will be used to examine potential differences  
19  
20 402 between intervention groups. Independent Component Analysis (ICA) will be  
21  
22 403 performed for rs-fMRI data (FSL-MELODIC, v 3.12). The resulting denoised  
23  
24 404 functional images will be resampled to standard space (MNI152 template 2 mm).  
25  
26 405 Dual-regression analyses on the denoised, registered functional images of each  
27  
28 406 subject will be performed to obtain individual spatial maps of the resting-state  
29  
30 407 networks, focusing on the sensorimotor and salience network. Group functional  
31  
32 408 connectivity maps for timepoints 1 and 2 and longitudinal change will be computed  
33  
34 409 for each subject (using FSL Randomise).

#### 40 Qualitative data analysis

41  
42 411 A thematic analysis, understood as a 'method for identifying, analysing, and reporting  
43  
44 412 patterns or themes within data'<sup>102</sup> of the interview material will be performed.<sup>103 104</sup>  
45  
46 413 Semantic and latent themes will be identified, summarised and interpreted,<sup>102</sup> with data  
47  
48 414 coded, segmented and extracted. From this data, broader themes will be developed.  
49  
50 415 Themes will be reviewed, refined and validated in an iterative and reflexive process,<sup>105</sup>  
51  
52 416 data recoded as appropriate, and subthemes identified. Subthemes or categories will  
53  
54 417 be judged by the criteria of internal homogeneity (meaningful coherence within a  
55  
56 418 category) and external heterogeneity (clear differences between categories).<sup>106</sup> The  
57  
58  
59  
60

1  
2  
3 419 consolidated criteria for reporting qualitative research (COREQ) will be followed to  
4  
5 420 enhance rigour, credibility and reliability.<sup>107</sup>  
6

## 7 421 **DISCUSSION**

9  
10 422 This study will investigate the effects of three variants of home-based cued gait training  
11  
12 423 interventions on walking, fatigue, emotional and cognitive function, and brain  
13  
14 424 activation. Music will be included to both provide a temporal cueing to the real or  
15  
16 425 imagined walking and potentially induce pleasure in practitioners. Pleasurable,  
17  
18 426 motivating music is known to induce highly enjoyable emotions, motivation and  
19  
20 427 arousal.<sup>108</sup> This may be relevant because studies have shown that depression<sup>109</sup> and  
21  
22 428 cognitive or higher levels of motor impairment<sup>110 111</sup> reduce the MI ability in pwMS.  
23  
24 429 Therefore, it seems relevant to include screening for anxiety, depression, and cognitive  
25  
26 430 impairment in the planned study. It needs to be considered however, that our music-  
27  
28 431 based intervention could impact on mood and cognition in study participants.<sup>112 113</sup>  
29  
30 432 Moreover, other aspects, such as music-induced motivation, pleasure or arousal have  
31  
32 433 not been previously measured in pwMS.  
33  
34  
35  
36

37 434 Functional MRI is a state-of-the-art method for assessing potential underlying  
38  
39 435 mechanisms of motor impairment and rehabilitation. Extending the study by Tavazzi  
40  
41 436 et al.,<sup>29</sup> who showed a reduction in brain activation following its expansion after gait  
42  
43 437 rehabilitation in pwMS, we will assess potential changes in brain activation  
44  
45 438 associated with cued MI and/or cued gait training. In line with previous studies, we  
46  
47 439 expect that pwMS recruit similar brain areas during MI and actual movement, albeit  
48  
49 440 sensorimotor regions might be activated to a lesser and premotor and parietal  
50  
51 441 regions recruited to a higher extent during MI.<sup>114 115</sup> Additionally, cued MI training  
52  
53 442 may lead to similar reorganisation patterns compared to training of the actual  
54  
55 443 movement.<sup>32</sup>  
56  
57  
58  
59  
60

1  
2  
3 444 Advantages of a home-based intervention are that pwMS can practise independently.  
4  
5 445 Depending on the results from this study, the most effective music-cued gait  
6  
7 446 intervention can easily be put into practice, provided that specifically trained  
8  
9 447 physiotherapists guide patients' training.  
10  
11

## 12 448 **DECLARATIONS**

### 14 449 **Ethics, licences and dissemination plan**

16  
17 450 The study will be conducted in accordance with the principles of the Declaration of  
18  
19 451 Helsinki (1964; 2013) and ICH E6(R2) Guideline for Good Clinical Practice (2016). The  
20  
21 452 study protocol was approved by the Ethics Committees of the Medical Universities of  
22  
23 453 Innsbruck and Graz on the 22.12.2020 (references 1347/2020 and 33-056 ex 20/21).  
24  
25 454 A licence was obtained for using the MoCA, SDMT and MusiQoL from MoCA Test Inc.  
26  
27 455 (Greenfield Park, Quebec), Hogrefe Austria GmbH (Vienna, Austria) and Mapi  
28  
29 456 Research Trust (Lyon, France). Results will be disseminated to participants via letters  
30  
31 457 and to clinicians and researchers via conferences and peer-reviewed publications.  
32  
33  
34

### 35 458 **Acknowledgements**

36  
37 459 The authors would like to thank patients in previous studies for their support and Prof.  
38  
39 460 Markus Reindl for helpful comments.  
40  
41

### 42 461 **Author Contributions**

43  
44 462 BS devised and designed the study, qualitative methodology and overall data  
45  
46 463 analyses. FD, CB, CE and DP substantially contributed to the conception and design  
47  
48 464 of the study. BS, DP and BH drafted the manuscript. DP, BH, SR and GR devised the  
49  
50 465 MRI analyses. RE and HH provided substantial input on the study methodology. FD,  
51  
52 466 CE and CB are study managers at their centres. All authors critically revised and  
53  
54 467 approved the final manuscript.  
55  
56  
57

### 58 468 **Funding**

1  
2  
3 469 This is an academic study, which is conducted with the financial support of Celgene, a  
4  
5 470 company of Bristol Myers Squibb (NA-CL-MS-PI-13909). The people involved in  
6  
7 471 decision-making about this funding have no influence on the study planning, conduct  
8  
9 472 and publication.  
10  
11

### 12 473 **Competing interests**

13  
14 474 None declared.  
15  
16

### 17 475 **Data sharing statement**

18  
19 476 Data generated by this research that support any publications will be made available  
20  
21 477 upon reasonable request as soon as possible. It will be considered submitting these  
22  
23 478 data to the Open Science initiative once future analyses related to this data set are  
24  
25 479 completed. The informed consent form includes the consent to controlled data sharing.  
26  
27

### 28 480 **REFERENCES**

- 29  
30  
31 481 1. Compston A, Confavreux C, Lassmann H, et al. *McAlpine's multiple sclerosis*. 4<sup>th</sup> ed ed.  
32 482 London: Elsevier 2006.  
33 483 2. Induruwa I, Constantinescu CS, Gran B. Fatigue in multiple sclerosis -a brief review. *J*  
34 484 *Neurol Sci* 2012;323(1-2):9-15. doi: 10.1016/j.jns.2012.08.007  
35 485 3. Krupp L. Fatigue is intrinsic to multiple sclerosis (MS) and is the most commonly reported  
36 486 symptom of the disease. *Multiple Sclerosis Journal* 2006;12(4):367-8.  
37 487 4. Kamran F, Samaei A, Asghari N, et al. The associations between fatigue, disability, and  
38 488 mobility and the quality of life in patients with multiple sclerosis. *Middle East Journal*  
39 489 *of Rehabilitation and Health* 2016;3(1):e34037. doi: 10.17795/mejrh-34037  
40 490 5. Guillot A, Di Rienzo F, Macintyre T, et al. Imagining is not doing but involves specific motor  
41 491 commands: a review of experimental data related to motor inhibition. *Frontiers in*  
42 492 *human neuroscience* 2012;6:247. doi: 10.3389/fnhum.2012.00247  
43 493 6. Thaut MH. *Rhythm, music and the brain*. Scientific foundations and clinical applications.  
44 494 New York: Routledge 2007:272.  
45 495 7. Thaut MH, Leins AK, Rice RR, et al. Rhythmic auditory stimulation improves gait more  
46 496 than NDT/Bobath training in near-ambulatory patients early poststroke: a single-blind,  
47 497 randomized trial. *Neurorehabil Neural Repair* 2007;21(5):455-9. doi:  
48 498 10.1177/1545968307300523  
49 499 8. Hove MJ, Suzuki K, Uchitomi H, et al. Interactive rhythmic auditory stimulation reinstates  
50 500 natural 1/f timing in gait of Parkinson's patients. *PloS one* 2012;7(3):e32600. doi:  
51 501 10.1371/journal.pone.0032600  
52 502 9. Wittwer JE, Webster KE, Hill K. Music and metronome cues produce different effects on  
53 503 gait spatiotemporal measures but not gait variability in healthy older adults. *Gait &*  
54 504 *posture* 2013;37(2):219-22. doi: 10.1016/j.gaitpost.2012.07.006  
55 505 10. Cason N, Schon D. Rhythmic priming enhances the phonological processing of speech.  
56 506 *Neuropsychologia* 2012;50(11):2652-8. doi: 10.1016/j.neuropsychologia.2012.07.018  
57 507 11. Hausen M, Torppa R, Salmela VR, et al. Music and speech prosody: a common rhythm.  
58 508 *Frontiers in psychology* 2013;4:566. doi: 10.3389/fpsyg.2013.00566  
59  
60

1  
2  
3  
4  
5  
6  
7  
8  
9  
10  
11  
12  
13  
14  
15  
16  
17  
18  
19  
20  
21  
22  
23  
24  
25  
26  
27  
28  
29  
30  
31  
32  
33  
34  
35  
36  
37  
38  
39  
40  
41  
42  
43  
44  
45  
46  
47  
48  
49  
50  
51  
52  
53  
54  
55  
56  
57  
58  
59  
60  
564

12. Baram Y. Virtual sensory feedback for gait improvement in neurological patients. *Frontiers in neurology* 2013;4:138. doi: 10.3389/fneur.2013.00138
13. Uchitomi H, Ota L, Ogawa K-I, et al. Interactive rhythmic cue facilitates gait relearning in patients with Parkinson's disease. *PLoS one* 2013;8(9) doi: 10.1371/journal.pone.0072176.g001
14. Muto T, Herzberger B, Hermsdoerfer J, et al. Interactive cueing with Walk-Mate for hemiparetic stroke rehabilitation. *Journal of neuroengineering and rehabilitation* 2012;9:58. doi: 10.1186/1743-0003-9-58
15. Conklyn D, Stough D, Novak E, et al. A home-based walking program using rhythmic auditory stimulation improves gait performance in patients with multiple sclerosis: a pilot study. *Neurorehabil Neural Repair* 2010;24(9):835-42. doi: 10.1177/1545968310372139 [published Online First: 2010/07/21]
16. Shahraki M, Sohrabi M, Taheri Torbati HR, et al. Effect of rhythmic auditory stimulation on gait kinematic parameters of patients with multiple sclerosis. *Journal of medicine and life* 2017;10(1):33-37.
17. Janata P, Tomic ST, Haberman JM. Sensorimotor coupling in music and the psychology of the groove. *Journal of Experimental Psychology: General* 2012;141(1):54-75. doi: 10.1037/a0024208
18. Jeannerod M. Mental imagery in the motor context. *Neuropsychologia* 1995;33(11):1419-32.
19. Kosslyn SM, Ganis G, Thompson WL. Neural foundations of imagery. *Nature Reviews Neuroscience* 2001;2(9):635-42. doi: 10.1038/35090055
20. Munzert J, Lorey B, Zentgraf K. Cognitive motor processes: the role of motor imagery in the study of motor representations. *Brain research reviews* 2009;60(2):306-26. doi: 10.1016/j.brainresrev.2008.12.024
21. Schuster C, Hilfiker R, Amft O, et al. Best practice for motor imagery: a systematic literature review on motor imagery training elements in five different disciplines. *BMC Med* 2011;9:75. doi: 10.1186/1741-7015-9-75 [published Online First: 2011/06/21]
22. Jeannerod M. *The cognitive neuroscience of action*. Oxford: Blackwell 1997.
23. Callow N, Hardy L. The relationship between the use of kinaesthetic imagery and different visual imagery perspectives. *Journal of Sports Science* 2004;22(2):167-77. doi: 10.1080/02640410310001641449
24. Guillot A, Collet C, Dittmar A. Relationship between visual and kinesthetic imagery, field dependence-independence, and complex motor skills. *Journal of Psychophysiology* 2004;18(4):190-8. doi: 10.1027/0269-8803.18.4.190
25. Mohammadzadeh M, Haghgoo HA, Biglarian A. Effects of Combined Mental and Physical Practices on Walking and Daily Living Activities in Individuals With Multiple Sclerosis. *Iranian-Rehabilitation-Journal* 2020;18(4):455-64. doi: 10.32598/irj.18.4.1070.1
26. Kahraman T, Savci S, Ozdogar AT, et al. Physical, cognitive and psychosocial effects of telerehabilitation-based motor imagery training in people with multiple sclerosis: A randomized controlled pilot trial. *Journal of telemedicine and telecare* 2020;26(5):251-60. doi: 10.1177/1357633x18822355 [published Online First: 2019/02/13]
27. Seebacher B, Kuisma R, Glynn A, et al. The effect of rhythmic-cued motor imagery on walking, fatigue and quality of life in people with multiple sclerosis: A randomised controlled trial. *Mult Scler* 2017;23(2):286-96. doi: 10.1177/1352458516644058
28. Seebacher B, Kuisma R, Glynn A, et al. Effects and mechanisms of differently cued and non-cued motor imagery in people with multiple sclerosis: A randomised controlled trial. *Mult Scler* 2019;25(12):1593-604. doi: 10.1177/1352458518795332 [published Online First: 2018/08/15]
29. Tavazzi E, Bergsland N, Cattaneo D, et al. Effects of motor rehabilitation on mobility and brain plasticity in multiple sclerosis: a structural and functional MRI study. *Journal of neurology* 2018;265(6):1393-401. doi: 10.1007/s00415-018-8859-y
30. Hanson M, Concialdi M. Motor imagery in multiple sclerosis: exploring applications in therapeutic treatment. *J Neurophysiol* 2019;121(2):347-49. doi: 10.1152/jn.00291.2018

- 1  
2  
3 565 31. Sandroff BM, Jones CD, Baird JF, et al. Systematic Review on Exercise Training as a  
4 566 Neuroplasticity-Inducing Behavior in Multiple Sclerosis. *Neurorehabil Neural Repair*  
5 567 2020;34(7):575-88. doi: 10.1177/1545968320921836 [published Online First:  
6 568 2020/05/27]
- 7 569 32. Vogt S, Rienzo FD, Collet C, et al. Multiple roles of motor imagery during action  
8 570 observation. *Frontiers in human neuroscience* 2013;7:807. doi:  
9 571 10.3389/fnhum.2013.00807
- 10 572 33. Schulz KF, Altman DG, Moher D, et al. CONSORT 2010 statement: updated guidelines  
11 573 for reporting parallel group randomised trials. *PLoS medicine* 2010;7(3):e1000251.  
12 574 doi: 10.1371/journal.pmed.1000251
- 13 575 34. Thompson AJ, Banwell BL, Barkhof F, et al. Diagnosis of multiple sclerosis: 2017  
14 576 revisions of the McDonald criteria. *The Lancet Neurology* 2018;17(2):162-73. doi:  
15 577 10.1016/s1474-4422(17)30470-2
- 16 578 35. Polman CH, Reingold SC, Banwell B, et al. Diagnostic criteria for multiple sclerosis: 2010  
17 579 revisions to the McDonald criteria. *Ann Neurol* 2011;69(2):292-302. doi:  
18 580 10.1002/ana.22366 [published Online First: 2011/03/10]
- 19 581 36. Kurtzke JF. Rating neurologic impairment in multiple sclerosis: an Expanded Disability  
20 582 Status Scale (EDSS). *Neurology* 1983;33(11):1444-52. [published Online First:  
21 583 1983/11/01]
- 22 584 37. Freitas S, Batista S, Afonso AC, et al. The Montreal Cognitive Assessment (MoCA) as a  
23 585 screening test for cognitive dysfunction in multiple sclerosis. *Appl Neuropsychol Adult*  
24 586 2018;25(1):57-70. doi: 10.1080/23279095.2016.1243108
- 25 587 38. Litster B, Fiest KM, Patten SB, et al. Screening Tools for Anxiety in People with Multiple  
26 588 Sclerosis: A Systematic Review. *Int J MS Care* 2016;18(6):273-81. doi:  
27 589 10.7224/1537-2073.2016-004
- 28 590 39. Watson TM, Ford E, Worthington E, et al. Validation of Mood Measures for People with  
29 591 Multiple Sclerosis. *Int J MS Care* 2014;16:105-09.
- 30 592 40. Hanna J, Santo JB, Blair M, et al. Comparing depression screening tools in persons with  
31 593 multiple sclerosis (MS). *Rehabilitation psychology* 2017;62(1):20-24. doi:  
32 594 10.1037/rep0000115
- 33 595 41. Zigmond AS, Snaith RP. The hospital anxiety and depression scale. *Acta psychiatrica*  
34 596 *Scandinavica* 1983;67(6):361-70.
- 35 597 42. Nasreddine ZS, Phillips NA, Bedirian V, et al. The Montreal Cognitive Assessment,  
36 598 MoCA: a brief screening tool for mild cognitive impairment. *Journal of the American*  
37 599 *Geriatrics Society* 2005;53(4):695-9. doi: 10.1111/j.1532-5415.2005.53221.x
- 38 600 43. Baert I, Freeman J, Smedal T, et al. Responsiveness and clinically meaningful  
39 601 improvement, according to disability level, of five walking measures after rehabilitation  
40 602 in multiple sclerosis: a European multicenter study. *Neurorehabil Neural Repair*  
41 603 2014;28(7):621-31. doi: 10.1177/1545968314521010
- 42 604 44. Audacity®. Version 3.0.0. Audio editor and recorder: Audacity Team; 2012 [It is free  
43 605 software distributed under the terms of the GNU General Public License. The name  
44 606 Audacity® is a registered trademark.]. Available from: <http://audacityteam.org/>  
45 607 accessed 19.11. 2020.
- 46 608 45. Thaut CP, Rice RR. Rhythmic auditory stimulation (RAS). In: Thaut MH, Hoemberg V,  
47 609 eds. *Handbook of neurologic music therapy*. Oxford: Oxford University Press  
48 610 2014:94-105.
- 49 611 46. Karageorghis CI, Terry PC, Lane AM, et al. The BASES Expert Statement on use of  
50 612 music in exercise. *Journal of sports sciences* 2012;30(9):953-6. doi:  
51 613 10.1080/02640414.2012.676665
- 52 614 47. Edwards WH. *Motor learning and control: from theory to practice*. Belmont: Wadsworth  
53 615 2011.
- 54 616 48. Wondrusch C, Schuster-Amft C. A standardized motor imagery introduction program  
55 617 (MIIP) for neuro-rehabilitation: development and evaluation. *Frontiers in human*  
56 618 *neuroscience* 2013;7:477. doi: 10.3389/fnhum.2013.00477
- 57 619 49. Holmes PS, Collins DJ. The PETTLEP approach to motor imagery: A functional  
58 620 equivalence model for sport psychologists. *J Appl Sport Psychol* 2001;13(1):60-83.

- 1  
2  
3 621 50. Hoffmann TC, Glasziou PP, Boutron I, et al. Better reporting of interventions: template for  
4 622 intervention description and replication (TIDieR) checklist and guide. *Bmj*  
5 623 2014;348:g1687. doi: 10.1136/bmj.g1687  
6 624 51. Kaufman M, Moyer D, Norton J. The significant change for the Timed 25-foot Walk in the  
7 625 Multiple Sclerosis Functional Composite. *Mult Scler* 2000;6(4):286-90. [published  
8 626 Online First: 2000/08/30]  
9 627 52. Gijbels D, Eijnde BO, Feys P. Comparison of the 2- and 6-minute walk test in multiple  
10 628 sclerosis. *Mult Scler* 2011;17(10):1269-72. doi: 10.1177/1352458511408475  
11 629 [published Online First: 2011/06/07]  
12 630 53. Butland RJ, Pang J, Gross ER, et al. Two-, six-, and 12-minute walking tests in  
13 631 respiratory disease. *Br Med J (Clin Res Ed)* 1982;284(6329):1607-8.  
14 632 54. Cutter GR, Baier ML, Rudick RA, et al. Development of a multiple sclerosis functional  
15 633 composite as a clinical trial outcome measure. *Brain : a journal of neurology*  
16 634 1999;122 ( Pt 5):871-82.  
17 635 55. Nieuwenhuis MM, Van Tongeren H, Sorensen PS, et al. The six spot step test: a new  
18 636 measurement for walking ability in multiple sclerosis. *Multiple Sclerosis Journal*  
19 637 2006;12(4):495-500. [published Online First: 2006/08/12]  
20 638 56. Bosma LV, Sonder JM, Kragt JJ, et al. Detecting clinically-relevant changes in  
21 639 progressive multiple sclerosis. *Multiple Sclerosis Journal* 2015;21(2):171-9. doi:  
22 640 10.1177/1352458514540969  
23 641 57. Hobart J, Blight AR, Goodman A, et al. Timed 25-foot walk: direct evidence that  
24 642 improving 20% or greater is clinically meaningful in MS. *Neurology* 2013;80(16):1509-  
25 643 17. doi: 10.1212/WNL.0b013e31828cf7f3  
26 644 58. A. T. S. Committee on Proficiency Standards for Clinical Pulmonary Function  
27 645 Laboratories. ATS statement: guidelines for the six-minute walk test. *American*  
28 646 *Journal of Respiratory and Critical Care Medicine* 2002;166(1):111-7. doi:  
29 647 10.1164/ajrccm.166.1.at1102  
30 648 59. Gershon RC, Wagster MV, Hendrie HC, et al. NIH toolbox for assessment of neurological  
31 649 and behavioral function. *Neurology* 2013;80(11 Suppl 3):S2-6. doi:  
32 650 10.1212/WNL.0b013e3182872e5f [published Online First: 2013/03/27]  
33 651 60. Gijbels D, Dalgas U, Romberg A, et al. Which walking capacity tests to use in multiple  
34 652 sclerosis? A multicentre study providing the basis for a core set. *Multiple Sclerosis*  
35 653 *Journal* 2012;18(3):364-71. doi: 10.1177/1352458511420598 [published Online First:  
36 654 2011/09/29]  
37 655 61. Valet M, Lejeune T, Devis M, et al. Timed Up-and-Go and 2-Minute Walk Test in patients  
38 656 with multiple sclerosis with mild disability: reliability, responsiveness and link with  
39 657 perceived fatigue. *European journal of physical and rehabilitation medicine*  
40 658 2019;55(4):450-55. doi: 10.23736/s1973-9087.18.05366-2 [published Online First:  
41 659 2018/10/13]  
42 660 62. Learmonth YC, Dlugonski DD, Pilutti LA, et al. The reliability, precision and clinically  
43 661 meaningful change of walking assessments in multiple sclerosis. *Mult Scler*  
44 662 2013;19(13):1784-91. doi: 10.1177/1352458513483890  
45 663 63. Enzinger C, Johansen-Berg H, Dawes H, et al. Functional MRI correlates of lower limb  
46 664 function in stroke victims with gait impairment. *Stroke; a journal of cerebral circulation*  
47 665 2008;39(5):1507-13. doi: 10.1161/strokeaha.107.501999 [published Online First:  
48 666 2008/03/15]  
49 667 64. NFI-MS Neurologischer Fragebogen zur Müdigkeit. *NFI-MS Austria/German - Version of*  
50 668 *30 Sep 13 - Mapi ID7555 / NFI-MS\_AU10\_deu-ATdoc* 2010.  
51 669 65. Mills RJ, Young CA, Pallant JF, et al. Development of a patient reported outcome scale  
52 670 for fatigue in multiple sclerosis: The Neurological Fatigue Index (NFI-MS). *Health and*  
53 671 *quality of life outcomes* 2010;8:22. doi: 10.1186/1477-7525-8-22  
54 672 66. Simeoni M, Auquier P, Fernandez O, et al. Validation of the Multiple Sclerosis  
55 673 International Quality of Life questionnaire. *Mult Scler* 2008;14(2):219-30. doi:  
56 674 10.1177/1352458507080733  
57 675 67. Flachenecker P, Vogel U, Simeoni MC, et al. [MusIQoL: international questionnaire  
58 676 investigating quality of life in multiple sclerosis: validation results for the German

- 1  
2  
3 677 subpopulation in an international comparison]. *Der Nervenarzt* 2011;82(10):1281-9.  
4 678 doi: 10.1007/s00115-011-3276-9
- 5 679 68. Moore F, Vickrey B, Fortin K, et al. Two Multiple Sclerosis Quality-of-Life Measures:  
6 680 Comparison in a National Sample. *Canadian Journal of Neurological Sciences /*  
7 681 *Journal Canadien des Sciences Neurologiques* 2015;42(1):55-63. doi:  
8 682 10.1017/cjn.2014.128 [published Online First: 2015/01/14]
- 9 683 69. Guillot A, Collet C. The neurophysiological foundations of mental and motor imagery.  
10 684 New York: Oxford University Press 2010.
- 11 685 70. Schuster C, Lussi A, Wirth B, et al. Two assessments to evaluate imagery ability:  
12 686 translation, test-retest reliability and concurrent validity of the German KVIQ and  
13 687 Imaprax. *BMC medical research methodology* 2012;12(1):127. doi: 10.1186/1471-  
14 688 2288-12-127
- 15 689 71. Malouin F, Richards CL, Jackson PL, et al. The Kinesthetic and Visual Imagery  
16 690 Questionnaire (KVIQ) for assessing motor imagery in persons with physical  
17 691 disabilities: a reliability and construct validity study. *Journal of neurologic physical*  
18 692 *therapy : JNPT* 2007;31(1):20-9. doi: 10.1097/01.npt.0000260567.24122.64
- 19 693 72. Collet C, Guillot A, Lebon F, et al. Measuring motor imagery using psychometric,  
20 694 behavioral, and psychophysiological tools. *Exercise and sport sciences reviews*  
21 695 2011;39(2):85-92. doi: 10.1097/JES.0b013e31820ac5e0
- 22 696 73. Lee WH, Kim E, Seo HG, et al. Target-oriented motor imagery for grasping action:  
23 697 different characteristics of brain activation between kinesthetic and visual imagery.  
24 698 *Scientific reports* 2019;9(1):12770. doi: 10.1038/s41598-019-49254-2 [published  
25 699 Online First: 2019/09/06]
- 26 700 74. Papaxanthis C, Pozzo T, Skoura X, et al. Does order and timing in performance of  
27 701 imagined and actual movements affect the motor imagery process? The duration of  
28 702 walking and writing task. *Behavioural brain research* 2002;134(1-2):209-15.
- 29 703 75. Decety J, Grezes J. Neural mechanisms subserving the perception of human actions.  
30 704 *Trends in cognitive sciences* 1999;3(5):172-78.
- 31 705 76. Jeannerod M. The 25th Bartlett Lecture: To act or not to act: Perspectives on the  
32 706 representation of actions. *The Quarterly Journal of Experimental Psychology A:*  
33 707 *Human Experimental Psychology* 1999;52A(1):1-29. doi: 10.1080/027249899391205
- 34 708 77. Decety J, Jeannerod M, Prablanc C. The timing of mentally represented actions.  
35 709 *Behavioural brain research* 1989;34(1-2):35-42.
- 36 710 78. Marchesotti S, Bassolino M, Serino A, et al. Quantifying the role of motor imagery in  
37 711 brain-machine interfaces. *Scientific reports* 2016;6:24076. doi: 10.1038/srep24076  
38 712 [published Online First: 2016/04/08]
- 39 713 79. Petermann F. Hospital Anxiety and Depression Scale, Deutsche Version (HADS-D).  
40 714 *Zeitschrift für Psychiatrie, Psychologie und Psychotherapie* 2011;59(3):251-53. doi:  
41 715 10.1024/1661-4747/a000077
- 42 716 80. Beck AT, Ward CH, Mendelson M, et al. An inventory for measuring depression. *Archives*  
43 717 *of general psychiatry* 1961;4:561-71.
- 44 718 81. Kozel B. Professionelle Pflege bei Suizidalität. Köln: Psychiatrie Verlag 2015:141.
- 45 719 82. Herrmann C, Buss U, Snaith RP. HADS-D: Ein Fragebogen zur Erfassung von Angst und  
46 720 Depressivität in der somatischen Medizin. Testdokumentation und Handanweisung.  
47 721 Bern: Verlag Hans Huber 1995.
- 48 722 83. Bartusch S, Zipper S. Montreal Cognitive Assessment (MoCA), deutsche Übersetzung  
49 723 2004 [Available from: [www.mocatest.org](http://www.mocatest.org) accessed 2 Jan, 2018].
- 50 724 84. Dagenais E, Rouleau I, Demers M, et al. Value of the MoCA test as a screening  
51 725 instrument in multiple sclerosis. *The Canadian journal of neurological sciences Le*  
52 726 *journal canadien des sciences neurologiques* 2013;40(3):410-5. doi:  
53 727 10.1017/s0317167100014384 [published Online First: 2013/04/23]
- 54 728 85. Sala G, Inagaki H, Iishioka Y, et al. The psychometric properties of the Montreal Cognitive  
55 729 Assessment (MoCA): A comprehensive investigation. *Swiss Journal of Psychology*  
56 730 2020;79(3-4):155-61. doi: 10.1024/1421-0185/a000242
- 57 731 86. Karageorghis CI, Priest DL, Terry PC, et al. Redesign and initial validation of an  
58 732 instrument to assess the motivational qualities of music in exercise: the Brunel Music



- 1  
2  
3 733 Rating Inventory-2. *Journal of sports sciences* 2006;24(8):899-909. doi:  
4 734 10.1080/02640410500298107
- 5 735 87. Clark IN, Baker FA, Peiris CL, et al. The Brunel Music Rating Inventory-2 is a reliable and  
6 736 valid instrument for older cardiac rehabilitation patients selecting music for exercise.  
7 737 *Psychology of Music* 2015;44(2):249-62. doi: 10.1177/0305735614565830
- 8 738 88. Lang PJ, Bradley MM, Cuthbert BN. International Affective Picture System (IAPS):  
9 739 Technical Manual and Affective Ratings. 1997.
- 10 740 89. Bradley MM, Lang PJ. Measuring emotion: the Self-Assessment Manikin and the  
11 741 Semantic Differential. *Journal of behavior therapy and experimental psychiatry*  
12 742 1994;25(1):49-59.
- 13 743 90. Geethanjali B, Adalarasu K, Hemapraba A, et al. Emotion analysis using SAM (Self-  
14 744 Assessment Manikin) scale. *Biomedical Research* 2017;S18-S24
- 15 745 91. Backs RW, da Silva SP, Han K. A comparison of younger and older adults' self-  
16 746 assessment manikin ratings of affective pictures. *Experimental aging research*  
17 747 2005;31(4):421-40. doi: 10.1080/03610730500206808
- 18 748 92. Seebacher B, Mills RJ, Reindl M, et al. German translation, cultural adaptation and  
19 749 validation of the unidimensional self-efficacy scale for multiple sclerosis. *BMC Neurol*  
20 750 2021;21(1):163. doi: 10.1186/s12883-021-02183-y [published Online First:  
21 751 2021/04/19]
- 22 752 93. Young CA, Mills RJ, Woolmore J, et al. The unidimensional self-efficacy scale for MS  
23 753 (USE-MS): developing a patient based and patient reported outcome. *Mult Scler*  
24 754 2012;18(9):1326-33. doi: 10.1177/1352458512436592
- 25 755 94. Smith A. Symbol Digit Modalities Test (SDMT). Manual (Revised). Los Angeles, CA:  
26 756 Western Psychological Services 1982.
- 27 757 95. Benedict RH, Cookfair D, Gavett R, et al. Validity of the minimal assessment of cognitive  
28 758 function in multiple sclerosis (MACFIMS). *Journal of the International*  
29 759 *Neuropsychological Society : JINS* 2006;12(4):549-58. doi:  
30 760 10.1017/s1355617706060723 [published Online First: 2006/09/20]
- 31 761 96. Amato MP, Portaccio E, Goretti B, et al. Relevance of cognitive deterioration in early  
32 762 relapsing-remitting MS: a 3-year follow-up study. *Mult Scler* 2010;16(12):1474-82. doi:  
33 763 10.1177/1352458510380089 [published Online First: 2010/08/24]
- 34 764 97. Benedict RH, DeLuca J, Phillips G, et al. Validity of the Symbol Digit Modalities Test as a  
35 765 cognition performance outcome measure for multiple sclerosis. *Mult Scler*  
36 766 2017;23(5):721-33. doi: 10.1177/1352458517690821 [published Online First:  
37 767 2017/02/17]
- 38 768 98. Benedict RH. Effects of using same- versus alternate-form memory tests during short-  
39 769 interval repeated assessments in multiple sclerosis. *Journal of the International*  
40 770 *Neuropsychological Society : JINS* 2005;11(6):727-36. doi:  
41 771 10.1017/s1355617705050782 [published Online First: 2005/10/27]
- 42 772 99. Schmidt P, Pongratz V, Küster P, et al. Automated segmentation of changes in FLAIR-  
43 773 hyperintense white matter lesions in multiple sclerosis on serial magnetic resonance  
44 774 imaging. *NeuroImage: Clinical* 2019;23:101849. doi:  
45 775 <https://doi.org/10.1016/j.nicl.2019.101849>
- 46 776 100. Jenkinson M, Beckmann CF, Behrens TEJ, et al. FSL. *NeuroImage* 2012;62(2):782-90.  
47 777 doi: <https://doi.org/10.1016/j.neuroimage.2011.09.015>
- 48 778 101. Poldrack RA, Mumford JA, Nichols TE. Handbook of Functional MRI Data Analysis.  
49 779 Cambridge: Cambridge University Press 2011.
- 50 780 102. Braun V, Clarke V. Using thematic analysis in psychology. *Qualitative Research in*  
51 781 *Psychology* 2006;3(2):77-101. doi: 10.1191/1478088706qp063oa
- 52 782 103. Bree RT, Gallagher T. Using Microsoft Excel to code and thematically analyse  
53 783 qualitative data: a simple, cost-effective approach. *All Ireland Journal of Teaching and*  
54 784 *Learning in Higher Education (AISHE-J)* 2021;8(2):2811-19.
- 55 785 104. Bree RT, Dunne K, Brereton B, et al. Engaging learning and addressing over-  
56 786 assessment in the Science laboratory: solving a pervasive problem. *The All Ireland*  
57 787 *Journal of Teaching and Learning in Higher Education (AISHE-J)* 2014;6(3):206.1-  
58 788 06.36.

- 1  
2  
3 789 105. Srivastava P, Hopwood N. A Practical Iterative Framework for Qualitative Data Analysis.  
4 790 *International Journal of Qualitative Methods* 2009;8(1):76-84. doi:  
5 791 10.1177/160940690900800107  
6 792 106. Patton MQ. Qualitative evaluation and research methods, 2nd ed. Thousand Oaks, CA,  
7 793 US: Sage Publications, Inc 1990.  
8 794 107. Tong A, Sainsbury P, Craig J. Consolidated criteria for reporting qualitative research  
9 795 (COREQ): a 32-item checklist for interviews and focus groups. *International journal*  
10 796 *for quality in health care : journal of the International Society for Quality in Health*  
11 797 *Care / ISQua* 2007;19(6):349-57. doi: 10.1093/intqhc/mzm042  
12 798 108. Witek MA, Clarke EF, Wallentin M, et al. Syncopation, body-movement and pleasure in  
13 799 groove music. *PloS one* 2014;9(4):e94446. doi: 10.1371/journal.pone.0094446  
14 800 109. Tabrizi YM, Mazhari S, Nazari MA, et al. Abnormalities of motor imagery and  
15 801 relationship with depressive symptoms in mildly disabling relapsing-remitting multiple  
16 802 sclerosis. *Journal of neurologic physical therapy : JNPT* 2014;38(2):111-8. doi:  
17 803 10.1097/NPT.0000000000000033  
18 804 110. Tacchino A, Bove M, Pedulla L, et al. Imagined actions in multiple sclerosis patients:  
19 805 evidence of decline in motor cognitive prediction. *Experimental Brain Research*  
20 806 2013;229(4):561-70. doi: 10.1007/s00221-013-3617-y  
21 807 111. Heremans E, D'Hooge A M, De Bondt S, et al. The relation between cognitive and  
22 808 motor dysfunction and motor imagery ability in patients with multiple sclerosis. *Mult*  
23 809 *Scler* 2012;18(9):1303-9. doi: 10.1177/1352458512437812 [published Online First:  
24 810 2012/03/02]  
25 811 112. Sihvonen AJ, Sarkamo T, Leo V, et al. Music-based interventions in neurological  
26 812 rehabilitation. *Lancet Neurol* 2017;16(8):648-60. doi: 10.1016/S1474-4422(17)30168-  
27 813 0 [published Online First: 2017/07/01]  
28 814 113. Karageorghis CI, Terry PC. The psychological, psychophysical, and ergogenic effects of  
29 815 music in sport: a review and synthesis. In: Bateman AJ, Bale JR, eds. *Sporting*  
30 816 *sounds: relationships between sport and music*. London: Routledge 2009:13-36.  
31 817 114. Hetu S, Gregoire M, Saimpont A, et al. The neural network of motor imagery: An ALE  
32 818 meta-analysis. *Neuroscience and biobehavioral reviews* 2013 doi:  
33 819 10.1016/j.neubiorev.2013.03.017  
34 820 115. Hardwick RM, Caspers S, Eickhoff SB, et al. Neural Correlates of Motor Imagery, Action  
35 821 Observation, and Movement Execution: A Comparison Across Quantitative Meta-  
36 822 Analyses. *bioRxiv* 2017:198432. doi: 10.1101/198432  
37  
38  
39  
40 823  
41  
42  
43  
44  
45  
46  
47  
48  
49  
50  
51  
52  
53  
54  
55  
56  
57  
58  
59  
60

1  
2  
3  
4  
5  
6  
7  
8  
9  
10  
11  
12  
13  
14  
15  
16  
17  
18  
19  
20  
21  
22  
23  
24  
25  
26  
27  
28  
29  
30  
31  
32  
33  
34  
35  
36  
37  
38  
39  
40  
41  
42  
43  
44  
45  
46  
47  
48  
49  
50  
51  
52  
53  
54  
55  
56  
57  
58  
59  
60

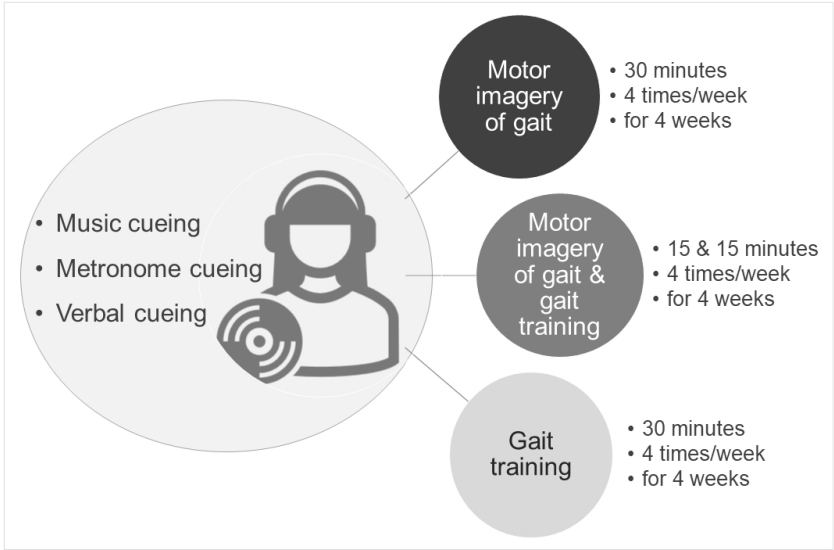

Figure 1

108x60mm (300 x 300 DPI)

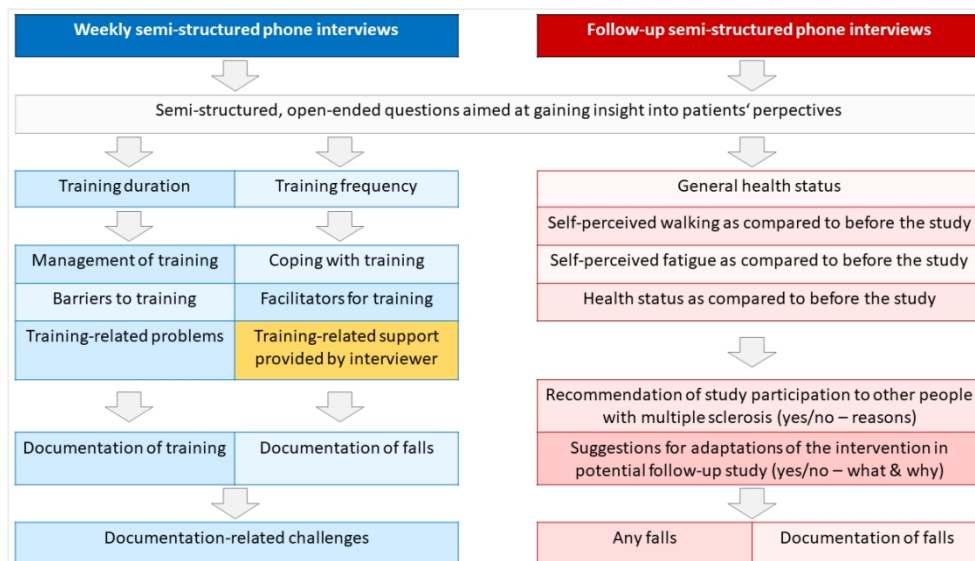

Figure 2

108x60mm (300 x 300 DPI)

1  
2  
3  
4  
5  
6  
7  
8  
9  
10  
11  
12  
13  
14  
15  
16  
17  
18  
19  
20  
21  
22  
23  
24  
25  
26  
27  
28  
29  
30  
31  
32  
33  
34  
35  
36  
37  
38  
39  
40  
41  
42  
43  
44  
45  
46  
47  
48  
49  
50  
51  
52  
53  
54  
55  
56  
57  
58  
59  
60

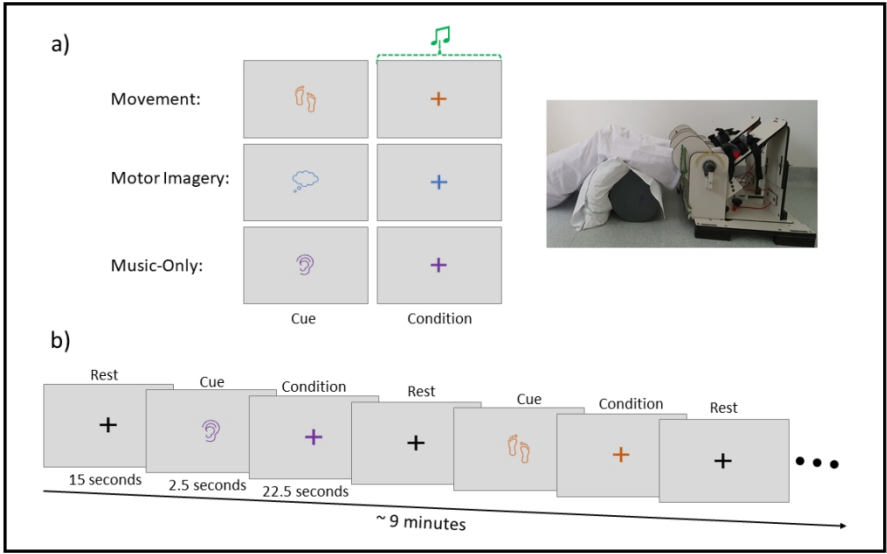

Figure 3

108x60mm (300 x 300 DPI)

CONSORT 2010 Flow Diagram

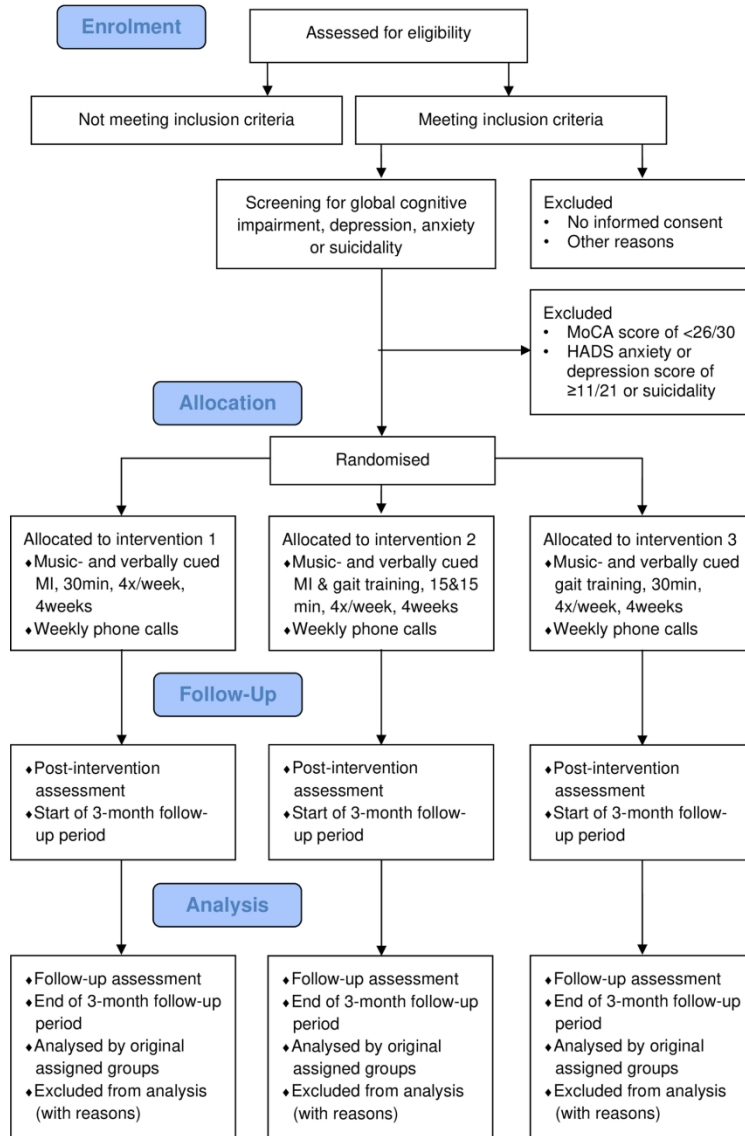

138x222mm (300 x 300 DPI)

**Table 1** Intervention chart

| ITEM NO                 | ITEM DESCRIPTION                                                                                                                                                                                                                                                                               |                                                                   |                                                            |
|-------------------------|------------------------------------------------------------------------------------------------------------------------------------------------------------------------------------------------------------------------------------------------------------------------------------------------|-------------------------------------------------------------------|------------------------------------------------------------|
| <b>1 BRIEF NAME</b>     | <b>Group 1</b>                                                                                                                                                                                                                                                                                 | <b>Group 2</b>                                                    | <b>Group 3</b>                                             |
|                         | Motor imagery (MI) with music-,<br>metronome- and verbal cueing                                                                                                                                                                                                                                | MI and gait training with music-,<br>metronome- and verbal cueing | Gait training with music-,<br>metronome- and verbal cueing |
|                         | Music accentuated by metronome cues and intermittent concise verbal cueing                                                                                                                                                                                                                     |                                                                   |                                                            |
| <b>2 WHY</b>            | <ul style="list-style-type: none"> <li>- PETTLEP (Physical, Environment, Task, Timing, Learning, Emotion, Perspective) approach to MI (Holmes and Collins 2001)<sup>1</sup></li> <li>- Rhythmic-auditory stimulation (cueing) for gait training (Thaut 2007)<sup>2</sup></li> </ul>            |                                                                   |                                                            |
| <b>3 WHAT MATERIALS</b> | <ul style="list-style-type: none"> <li>- Dropbox link including the audio mix and download to smartphone, laptop, tablet or MP3-player, or study CDs in group 1</li> <li>- 4 sessions in each audiomix, one for each week</li> <li>- Headphones or earphones may be used if desired</li> </ul> |                                                                   |                                                            |
| <b>Audiomix Content</b> | - Kinaesthetic MI instructions                                                                                                                                                                                                                                                                 | - Kinaesthetic MI and gait training instructions                  | - Gait training instructions                               |

|                          |                                                                                                                                                                                                                                                                                                                                                                                                                                            |                                                                                                                                                                                                        |                                                                                                                             |
|--------------------------|--------------------------------------------------------------------------------------------------------------------------------------------------------------------------------------------------------------------------------------------------------------------------------------------------------------------------------------------------------------------------------------------------------------------------------------------|--------------------------------------------------------------------------------------------------------------------------------------------------------------------------------------------------------|-----------------------------------------------------------------------------------------------------------------------------|
|                          | <ul style="list-style-type: none"> <li>- Instrumental music in 2/4 or 4/4 metre</li> <li>- Beat-accentuating metronome cues</li> <li>- Intermittent verbal cueing (e.g., “toe-off” or “step-step”)</li> <li>- Weekly change of music titles</li> <li>- Gradual increase in tempo</li> </ul>                                                                                                                                                |                                                                                                                                                                                                        |                                                                                                                             |
| <b>4 WHAT PROCEDURES</b> | <ul style="list-style-type: none"> <li>- Introduction to cued MI, familiarisation and training</li> </ul>                                                                                                                                                                                                                                                                                                                                  | <ul style="list-style-type: none"> <li>- Introduction to MI and gait training with cueing, familiarisation and training</li> </ul>                                                                     | <ul style="list-style-type: none"> <li>- Introduction to gait training with cueing, familiarisation and training</li> </ul> |
|                          | <ul style="list-style-type: none"> <li>- In lay language; description of the concept of MI; its application in sports and neurorehabilitation; MI perspectives (internal and external) and modes (visual, kinaesthetic).</li> <li>- Measurement of actual and imagined walking duration over a 6-metre distance to monitor the mental process</li> <li>- Performance feedback for participants and repeated training if desired</li> </ul> |                                                                                                                                                                                                        |                                                                                                                             |
|                          |                                                                                                                                                                                                                                                                                                                                                                                                                                            | <ul style="list-style-type: none"> <li>- In lay language; description of the concept of cued gait training and sensorimotor interaction; its application in sports and neurorehabilitation;</li> </ul> |                                                                                                                             |



|                            |                                                                                                                                                                                                                                                                                |                                                                                                                                                                                                                                                                                    |
|----------------------------|--------------------------------------------------------------------------------------------------------------------------------------------------------------------------------------------------------------------------------------------------------------------------------|------------------------------------------------------------------------------------------------------------------------------------------------------------------------------------------------------------------------------------------------------------------------------------|
|                            |                                                                                                                                                                                                                                                                                | <p>gait synchronisation with the music/metronome beat; musical tempo modulations.</p> <ul style="list-style-type: none"> <li>- Additional introduction to rhythmic auditory stimulation plus its use in neurorehabilitation</li> <li>- Rhythmic-cued MI familiarisation</li> </ul> |
|                            | <ul style="list-style-type: none"> <li>- Weekly phone calls for training support, adherence and adverse events reports</li> <li>- Phone calls at 4-week follow-up for feedback</li> </ul>                                                                                      |                                                                                                                                                                                                                                                                                    |
| <b>PETTLEP Elements</b>    |                                                                                                                                                                                                                                                                                | <b>Rhythmic-cued gait training</b>                                                                                                                                                                                                                                                 |
| <b>Position (Physical)</b> | <ul style="list-style-type: none"> <li>- Practise at any time of the day when alert</li> <li>- Seated in an upright body position</li> <li>- Shoulders relaxed</li> <li>- Avoid tightening the muscles or moving</li> <li>- Eyes closed</li> <li>- Normal breathing</li> </ul> |                                                                                                                                                                                                                                                                                    |
|                            |                                                                                                                                                                                                                                                                                | <ul style="list-style-type: none"> <li>- Practice at any time of the day when alert</li> <li>- Use of headphones or earplugs if desired</li> <li>- Walking on a hallway (indoors) and/or familiar straight path (outdoors)</li> </ul>                                              |

|                             |                                                                                                                                                                                                                                                                                                                                                                                                                                                                                                                          |                                                                                                                                                                                                                                                                                                                        |
|-----------------------------|--------------------------------------------------------------------------------------------------------------------------------------------------------------------------------------------------------------------------------------------------------------------------------------------------------------------------------------------------------------------------------------------------------------------------------------------------------------------------------------------------------------------------|------------------------------------------------------------------------------------------------------------------------------------------------------------------------------------------------------------------------------------------------------------------------------------------------------------------------|
|                             |                                                                                                                                                                                                                                                                                                                                                                                                                                                                                                                          | <ul style="list-style-type: none"> <li>- Adjusting one's steps with the music or metronome beat (every second music beat)</li> <li>- Use of walking sticks if required for reasons of safety</li> <li>- Avoid using walking sticks with balance related tasks if safe</li> <li>- Periods of rest as desired</li> </ul> |
| <b>Environment</b>          | <ul style="list-style-type: none"> <li>- Practice in a quiet place at home</li> <li>- Imagine walking indoors (e.g., a long hallway) and walking outdoors (on a straight and familiar path)</li> </ul>                                                                                                                                                                                                                                                                                                                   |                                                                                                                                                                                                                                                                                                                        |
| <b>Tasks for all groups</b> | <ul style="list-style-type: none"> <li>- Take long/giant strides</li> <li>- Take extremely slow/small and quick strides</li> <li>- Touch the ground with your heels first</li> <li>- Roll your feet on the ground and feel your body weight on your soles</li> <li>- Toe-off</li> <li>- Raise your knees</li> <li>- Pace elegantly and upright like a queen/king</li> <li>- Place/feel your weight on your feet/legs</li> <li>- - Feel the swinging of your arms while walking/swing your arms during walking</li> </ul> |                                                                                                                                                                                                                                                                                                                        |

1  
2  
3  
4  
5  
6  
7  
8  
9  
10  
11  
12  
13  
14  
15  
16  
17  
18  
19  
20  
21  
22  
23  
24  
25  
26  
27  
28  
29  
30  
31  
32  
33  
34  
35  
36  
37  
38  
39  
40  
41  
42  
43  
44  
45  
46

|                                                    |                                                                                                                                                                                                                          |                                                                                                                                                                                                                                            |
|----------------------------------------------------|--------------------------------------------------------------------------------------------------------------------------------------------------------------------------------------------------------------------------|--------------------------------------------------------------------------------------------------------------------------------------------------------------------------------------------------------------------------------------------|
|                                                    | <ul style="list-style-type: none"> <li>- Stamp your feet while walking, walk forcefully and energetically</li> <li>- Walk effortlessly, feeling lightly</li> <li>- Take wide/narrow steps</li> </ul>                     |                                                                                                                                                                                                                                            |
| <b>Timing of the MI and gait training</b>          | External timing is provided: “imagine yourself walking in time with the music or metronome and verbal cues”                                                                                                              |                                                                                                                                                                                                                                            |
|                                                    |                                                                                                                                                                                                                          | External timing is provided: “walk in time with the music or metronome and verbal cues”                                                                                                                                                    |
|                                                    | <ul style="list-style-type: none"> <li>- Tempo (cadence) is between 80 and 120 steps/minute</li> <li>- Slow, medium and fast music pieces alternate, with a gradual progression in the tempo over the 4 weeks</li> </ul> |                                                                                                                                                                                                                                            |
| <b>Learning</b>                                    | <ul style="list-style-type: none"> <li>- See familiarisation</li> <li>- Weekly phone call support is provided</li> </ul>                                                                                                 |                                                                                                                                                                                                                                            |
| <b>Emotion related to the MI and gait training</b> | <ul style="list-style-type: none"> <li>- MI instructions include motivational and arousal enhancing aspects. See instructions under Tasks.</li> <li>- Motivational instrumental music is used with the MI</li> </ul>     |                                                                                                                                                                                                                                            |
|                                                    |                                                                                                                                                                                                                          | <ul style="list-style-type: none"> <li>- Gait training instructions include motivational and arousal enhancing aspects. See instructions under Tasks.</li> <li>- Motivational instrumental music is used with the gait training</li> </ul> |

|                                   |                                                                                                                                                                                                                                                                                                                                                                                                                                                                                                                                                                                                                      |                                                                                                                                                                                                                        |
|-----------------------------------|----------------------------------------------------------------------------------------------------------------------------------------------------------------------------------------------------------------------------------------------------------------------------------------------------------------------------------------------------------------------------------------------------------------------------------------------------------------------------------------------------------------------------------------------------------------------------------------------------------------------|------------------------------------------------------------------------------------------------------------------------------------------------------------------------------------------------------------------------|
| <b>Perspective</b>                | Kinaesthetic MI from an internal, first-person perspective                                                                                                                                                                                                                                                                                                                                                                                                                                                                                                                                                           | No MI                                                                                                                                                                                                                  |
| <b>5 WHO PROVIDES</b>             | <ul style="list-style-type: none"> <li>- The audiomix was created by the lead researcher (BS), an experienced neurological physiotherapist with 11 years of musical training and a PhD in physiotherapy.</li> <li>- The introduction, familiarisation and training is provided by neurological physiotherapists, occupational therapists and psychologists who received a structured and specific training by the lead researcher</li> <li>- All therapist researchers are supervised and supported by the lead researcher</li> <li>- Any intervention related processes are documented by the study team</li> </ul> |                                                                                                                                                                                                                        |
| <b>6 HOW – all delivery modes</b> | <ul style="list-style-type: none"> <li>- MI introduction, familiarisation and training: individually</li> <li>- Monitoring of mental process: individually</li> </ul>                                                                                                                                                                                                                                                                                                                                                                                                                                                |                                                                                                                                                                                                                        |
|                                   |                                                                                                                                                                                                                                                                                                                                                                                                                                                                                                                                                                                                                      | <ul style="list-style-type: none"> <li>- Cued gait training introduction, familiarisation and training: individually</li> <li>- Monitoring of understanding of gait synchronisation with beat: individually</li> </ul> |
|                                   | <ul style="list-style-type: none"> <li>- Weekly phone calls: individually</li> </ul>                                                                                                                                                                                                                                                                                                                                                                                                                                                                                                                                 |                                                                                                                                                                                                                        |
| <b>7 WHERE</b>                    | <ul style="list-style-type: none"> <li>- MI introduction, familiarisation, training and monitoring of mental process: at Medical University of Innsbruck (Centre 1) or Graz (Centre 3), Clinical Department of Neurology or Rehab Centre Münster (Centre 2), Austria</li> </ul>                                                                                                                                                                                                                                                                                                                                      |                                                                                                                                                                                                                        |

|                            |                                                                                                                                                                                                                                                                                                                                                                                                                                                                                                                       |                                                                                                                                                                                                                 |                                         |
|----------------------------|-----------------------------------------------------------------------------------------------------------------------------------------------------------------------------------------------------------------------------------------------------------------------------------------------------------------------------------------------------------------------------------------------------------------------------------------------------------------------------------------------------------------------|-----------------------------------------------------------------------------------------------------------------------------------------------------------------------------------------------------------------|-----------------------------------------|
|                            |                                                                                                                                                                                                                                                                                                                                                                                                                                                                                                                       | - Cued gait training introduction, familiarisation and training: at Medical University of Innsbruck (Centre 1) or Graz (Centre 3), Clinical Department of Neurology or Rehab Centre Münster (Centre 2), Austria |                                         |
|                            | - Cued MI practice: at participants' homes                                                                                                                                                                                                                                                                                                                                                                                                                                                                            |                                                                                                                                                                                                                 |                                         |
|                            |                                                                                                                                                                                                                                                                                                                                                                                                                                                                                                                       | Cued gait training: at participants' homes                                                                                                                                                                      |                                         |
| <b>8 WHEN AND HOW MUCH</b> | 30 minutes, 6 times a week, for 4 weeks                                                                                                                                                                                                                                                                                                                                                                                                                                                                               | 15 & 15 minutes, 6 times a week, for 4 weeks                                                                                                                                                                    | 30 minutes, 6 times a week, for 4 weeks |
| <b>9 TAILORING</b>         | Same intervention for all participants                                                                                                                                                                                                                                                                                                                                                                                                                                                                                | Same intervention for all participants                                                                                                                                                                          | Same intervention for all participants  |
| <b>10 MODIFICATIONS</b>    | No modifications                                                                                                                                                                                                                                                                                                                                                                                                                                                                                                      | No modifications                                                                                                                                                                                                | No modifications                        |
| <b>11 HOW WELL PLANNED</b> | <ul style="list-style-type: none"> <li>- Intervention adherence is assessed using a participant diary and also during weekly phone calls and at post-intervention</li> <li>- Support to intervention adherence is performed by the researchers who instruct participants (guidance and motivation)</li> <li>- Recording in structured support call logs is performed by the researchers who instruct participants</li> <li>- Recording in excel sheets is performed in excel sheets by the lead researcher</li> </ul> |                                                                                                                                                                                                                 |                                         |

|                                     |                                                                         |
|-------------------------------------|-------------------------------------------------------------------------|
| <b>12 HOW WELL</b><br><b>ACTUAL</b> | This is a study protocol and the adherence rates are not yet available. |
|-------------------------------------|-------------------------------------------------------------------------|

## References

1. Holmes PS, Collins DJ. The PETTLEP approach to motor imagery: A functional equivalence model for sport psychologists. *J Appl Sport Psychol* 2001;13(1):60-83.
2. Thaut MH. Rhythm, music and the brain. Scientific foundations and clinical applications. New York: Routledge 2007:272.

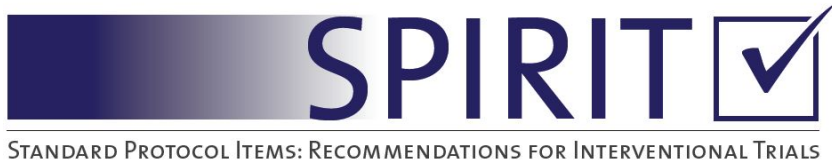

**SPIRIT 2013 and SPIRIT-PRO Extension Checklist:** Recommended Items to Address in a Clinical Trial Protocol  
 Calvert M, Kyte D, Mercieca-Bebber R, et al. Guidelines for Inclusion of Patient-Reported Outcomes in Clinical Trial Protocols: The SPIRIT-PRO Extension. JAMA : the journal of the American Medical Association 2018;319(5):483-94 doi: 10.1001/jama.2017.21903[published Online First: Epub Date])

| Section/item                      | ItemNo | Description                                                                                                  | SPIRIT-PRO Item No. | SPIRIT-PRO Extension or Elaboration Item Description | Addressed on Page No.   |
|-----------------------------------|--------|--------------------------------------------------------------------------------------------------------------|---------------------|------------------------------------------------------|-------------------------|
| <b>Administrative information</b> |        |                                                                                                              |                     |                                                      |                         |
| Title                             | 1      | Descriptive title identifying the study design, population, interventions, and, if applicable, trial acronym |                     |                                                      | Title page              |
| Trial registration                | 2a     | Trial identifier and registry name. If not yet registered, name of intended registry                         |                     |                                                      | Abstract                |
|                                   | 2b     | All items from the World Health Organization Trial Registration Data Set                                     |                     |                                                      | See below (pages 14-20) |
| Protocol version                  | 3      | Date and version identifier                                                                                  |                     |                                                      | Abstract                |
| Funding                           | 4      | Sources and types of financial, material, and other support                                                  |                     |                                                      | 25                      |

|                            |    |                                                                                                                                                                                                                                                                                          |                              |                                                                                  |                              |
|----------------------------|----|------------------------------------------------------------------------------------------------------------------------------------------------------------------------------------------------------------------------------------------------------------------------------------------|------------------------------|----------------------------------------------------------------------------------|------------------------------|
| Roles and responsibilities | 5a | Names, affiliations, and roles of protocol contributors                                                                                                                                                                                                                                  |                              |                                                                                  | 25                           |
|                            | 5b | Name and contact information for the trial sponsor                                                                                                                                                                                                                                       | SPIRIT-5a-PRO<br>Elaboration | Specify the individual(s) responsible for the PRO content of the trial protocol. | See Spirit Item 2B below     |
|                            | 5c | Role of study sponsor and funders, if any, in study design; collection, management, analysis, and interpretation of data; writing of the report; and the decision to submit the report for publication, including whether they will have ultimate authority over any of these activities |                              |                                                                                  | See Spirit Item 2B below; 25 |
|                            | 5d | Composition, roles, and responsibilities of the coordinating centre, steering committee, endpoint adjudication committee, data management team, and other individuals or groups overseeing the trial, if applicable (see Item 21a for data monitoring committee)                         |                              |                                                                                  | 9 and 21                     |
| <b>Introduction</b>        |    |                                                                                                                                                                                                                                                                                          |                              |                                                                                  |                              |



1  
2  
3  
4  
5  
6  
7  
8  
9  
10  
11  
12  
13  
14  
15  
16  
17  
18  
19  
20  
21  
22  
23  
24  
25  
26  
27  
28  
29  
30  
31  
32  
33  
34  
35  
36  
37  
38  
39  
40  
41  
42  
43  
44  
45  
46

|                                                           |    |                                                                                                                                                                                                           |                         |                                                                                                                              |                          |
|-----------------------------------------------------------|----|-----------------------------------------------------------------------------------------------------------------------------------------------------------------------------------------------------------|-------------------------|------------------------------------------------------------------------------------------------------------------------------|--------------------------|
| Background and rationale                                  | 6a | Description of research question and justification for undertaking the trial, including summary of relevant studies (published and unpublished) examining benefits and harms for each intervention        | SPIRIT-6a-PRO Extension | Describe the PRO-specific research question and rationale for PRO assessment and summarize PRO findings in relevant studies. | 5-6                      |
|                                                           | 6b | Explanation for choice of comparators                                                                                                                                                                     |                         |                                                                                                                              | 5-7                      |
| Objectives                                                | 7  | Specific objectives or hypotheses                                                                                                                                                                         | SPIRIT-7-PRO Extension  | State specific PRO objectives or hypotheses (including relevant PRO concepts/domains).                                       | 6                        |
| Trial design                                              | 8  | Description of trial design including type of trial (eg, parallel group, crossover, factorial, single group), allocation ratio, and framework (eg, superiority, equivalence, noninferiority, exploratory) |                         |                                                                                                                              | Title, Abstract, 4 and 6 |
| <b>Methods: Participants, interventions, and outcomes</b> |    |                                                                                                                                                                                                           |                         |                                                                                                                              |                          |
| Study setting                                             | 9  | Description of study settings (eg, community clinic, academic hospital) and list of countries where data will be collected. Reference to where list of study sites can be obtained                        |                         |                                                                                                                              | 6 and 9                  |

|                                                                                                                                                                                                    |                      |                                                                                                                                                                                                |                                                                                                                                                                                              |                         |                                                                                                                                                                                                                                                                   |                                       |
|----------------------------------------------------------------------------------------------------------------------------------------------------------------------------------------------------|----------------------|------------------------------------------------------------------------------------------------------------------------------------------------------------------------------------------------|----------------------------------------------------------------------------------------------------------------------------------------------------------------------------------------------|-------------------------|-------------------------------------------------------------------------------------------------------------------------------------------------------------------------------------------------------------------------------------------------------------------|---------------------------------------|
| 1<br>2<br>3<br>4<br>5<br>6<br>7<br>8<br>9<br>10<br>11<br>12<br>13                                                                                                                                  | Eligibility criteria | 10                                                                                                                                                                                             | Inclusion and exclusion criteria for participants. If applicable, eligibility criteria for study centres and individuals who will perform the interventions (eg, surgeons, psychotherapists) | SPIRIT-10-PRO Extension | Specify any PRO-specific eligibility criteria (eg, language/reading requirements or prerandomization completion of PRO). If PROs will not be collected from the entire study sample, provide a rationale and describe the method for obtaining the PRO subsample. | 7, Table 1                            |
| 14<br>15<br>16<br>17<br>18<br>19<br>20<br>21<br>22<br>23<br>24<br>25<br>26<br>27<br>28<br>29<br>30<br>31<br>32<br>33<br>34<br>35<br>36<br>37<br>38<br>39<br>40<br>41<br>42<br>43<br>44<br>45<br>46 | Interventions        | 11a                                                                                                                                                                                            | Interventions for each group with sufficient detail to allow replication, including how and when they will be administered                                                                   |                         |                                                                                                                                                                                                                                                                   | 10-11, Figure 1, Supplemental Table 1 |
| 11b                                                                                                                                                                                                |                      | Criteria for discontinuing or modifying allocated interventions for a given trial participant (eg, drug dose change in response to harms, participant request, or improving/worsening disease) |                                                                                                                                                                                              |                         | 21, Table 2                                                                                                                                                                                                                                                       |                                       |
| 11c                                                                                                                                                                                                |                      | Strategies to improve adherence to intervention protocols, and any procedures for monitoring adherence (eg, drug tablet return, laboratory tests)                                              |                                                                                                                                                                                              |                         | 7, 10-11, 14, Figure 2                                                                                                                                                                                                                                            |                                       |
| 11d                                                                                                                                                                                                |                      | Relevant concomitant care and interventions that are permitted or prohibited during the trial                                                                                                  |                                                                                                                                                                                              |                         | Tables 1 and 2 including legends                                                                                                                                                                                                                                  |                                       |

|                      |    |                                                                                                                                                                                                                                                                                                                                                                                |                         |                                                                                                                                                                                                                                                                                                                                 |                |
|----------------------|----|--------------------------------------------------------------------------------------------------------------------------------------------------------------------------------------------------------------------------------------------------------------------------------------------------------------------------------------------------------------------------------|-------------------------|---------------------------------------------------------------------------------------------------------------------------------------------------------------------------------------------------------------------------------------------------------------------------------------------------------------------------------|----------------|
| Outcomes             | 12 | Primary, secondary, and other outcomes, including the specific measurement variable (eg, systolic blood pressure), analysis metric (eg, change from baseline, final value, time to event), method of aggregation (eg, median, proportion), and time point for each outcome. Explanation of the clinical relevance of chosen efficacy and harm outcomes is strongly recommended | SPIRIT-12-PRO Extension | Specify the PRO concepts/domains used to evaluate the intervention (eg, overall health-related quality of life, specific domain, specific symptom) and, for each one, the analysis metric (eg, change from baseline, final value, time to event) and the principal time point or period of interest.                            | 11-21, Table 2 |
| Participant timeline | 13 | Time schedule of enrolment, interventions (including any run-ins and washouts), assessments, and visits for participants. A schematic diagram is highly recommended (see Figure)                                                                                                                                                                                               | SPIRIT-13-PRO Extension | Include a schedule of PRO assessments, providing a rationale for the time points, and justifying if the initial assessment is not prerandomization. Specify time windows, whether PRO collection is prior to clinical assessments, and, if using multiple questionnaires, whether order of administration will be standardized. | 6-7, Table 2   |
| Sample size          | 14 | Estimated number of participants needed to achieve study objectives and how it was determined, including clinical and statistical assumptions supporting any sample size calculations                                                                                                                                                                                          | SPIRIT-14-PRO Extension | When a PRO is the primary end point, state the required sample size (and how it was determined) and recruitment target (accounting for expected loss to follow-up). If sample size is not established based on the PRO end point, then discuss the power of the principal PRO analyses.                                         | 7              |

|                                                                            |                                                                     |     |                                                                                                                                                                                                                                                                                                                                                          |  |  |      |
|----------------------------------------------------------------------------|---------------------------------------------------------------------|-----|----------------------------------------------------------------------------------------------------------------------------------------------------------------------------------------------------------------------------------------------------------------------------------------------------------------------------------------------------------|--|--|------|
| 1<br>2<br>3<br>4<br>5<br>6<br>7                                            | Recruitment                                                         | 15  | Strategies for achieving adequate participant enrolment to reach target sample size                                                                                                                                                                                                                                                                      |  |  | 9-10 |
| 8<br>9                                                                     | <b>Methods: Assignment of interventions (for controlled trials)</b> |     |                                                                                                                                                                                                                                                                                                                                                          |  |  |      |
| 10<br>11                                                                   | Allocation:                                                         |     |                                                                                                                                                                                                                                                                                                                                                          |  |  |      |
| 12<br>13<br>14<br>15<br>16<br>17<br>18<br>19<br>20<br>21<br>22<br>23<br>24 | Sequence generation                                                 | 16a | Method of generating the allocation sequence (eg, computer-generated random numbers), and list of any factors for stratification. To reduce predictability of a random sequence, details of any planned restriction (eg, blocking) should be provided in a separate document that is unavailable to those who enrol participants or assign interventions |  |  | 9-10 |
| 25<br>26<br>27<br>28<br>29<br>30<br>31<br>32                               | Allocation concealment mechanism                                    | 16b | Mechanism of implementing the allocation sequence (eg, central telephone; sequentially numbered, opaque, sealed envelopes), describing any steps to conceal the sequence until interventions are assigned                                                                                                                                                |  |  | 10   |
| 33<br>34<br>35<br>36<br>37<br>38<br>39<br>40<br>41<br>42                   | Implementation                                                      | 16c | Who will generate the allocation sequence, who will enrol participants, and who will assign participants to interventions                                                                                                                                                                                                                                |  |  | 9-10 |

1  
2  
3  
4  
5  
6  
7  
8  
9  
10  
11  
12  
13  
14  
15  
16  
17  
18  
19  
20  
21  
22  
23  
24  
25  
26  
27  
28  
29  
30  
31  
32  
33  
34  
35  
36  
37  
38  
39  
40  
41  
42  
43  
44  
45  
46

|                                                           |     |                                                                                                                                                                                                                                                                                                                                                                                                              |                               |                                                                                                                                                                                                                                                                                                                                                                                                                                                                                                                                    |                             |
|-----------------------------------------------------------|-----|--------------------------------------------------------------------------------------------------------------------------------------------------------------------------------------------------------------------------------------------------------------------------------------------------------------------------------------------------------------------------------------------------------------|-------------------------------|------------------------------------------------------------------------------------------------------------------------------------------------------------------------------------------------------------------------------------------------------------------------------------------------------------------------------------------------------------------------------------------------------------------------------------------------------------------------------------------------------------------------------------|-----------------------------|
| Blinding (masking)                                        | 17a | Who will be blinded after assignment to interventions (eg, trial participants, care providers, outcome assessors, data analysts), and how                                                                                                                                                                                                                                                                    |                               |                                                                                                                                                                                                                                                                                                                                                                                                                                                                                                                                    | 10-11                       |
|                                                           | 17b | If blinded, circumstances under which unblinding is permissible, and procedure for revealing a participant's allocated intervention during the trial                                                                                                                                                                                                                                                         |                               |                                                                                                                                                                                                                                                                                                                                                                                                                                                                                                                                    | 10-11                       |
| <b>Methods: Data collection, management, and analysis</b> |     |                                                                                                                                                                                                                                                                                                                                                                                                              |                               |                                                                                                                                                                                                                                                                                                                                                                                                                                                                                                                                    |                             |
| Data collection methods                                   | 18a | Plans for assessment and collection of outcome, baseline, and other trial data, including any related processes to promote data quality (eg, duplicate measurements, training of assessors) and a description of study instruments (eg, questionnaires, laboratory tests) along with their reliability and validity, if known. Reference to where data collection forms can be found, if not in the protocol | SPIRIT-18a (i)-PRO Extension  | Justify the PRO instrument to be used and describe domains, number of items, recall period, and instrument scaling and scoring (eg, range and direction of scores indicating a good or poor outcome). Evidence of PRO instrument measurement properties, interpretation guidelines, and patient acceptability and burden should be provided or cited if available, ideally in the population of interest. State whether the measure will be used in accordance with any user manual and specify and justify deviations if planned. | 2, 11-21, Table 2, Figure 2 |
|                                                           |     |                                                                                                                                                                                                                                                                                                                                                                                                              | SPIRIT-18a (ii)-PRO Extension | Include a data collection plan outlining the permitted mode(s) of administration (eg, paper, telephone, electronic, other) and setting (eg, clinic, home, other).                                                                                                                                                                                                                                                                                                                                                                  | 2, 4, 6-7, 10-11, Table 2   |

|                 |     |                                                                                                                                                                                                                                                                   |                                       |                                                                                                                                                                                                                                                               |                    |
|-----------------|-----|-------------------------------------------------------------------------------------------------------------------------------------------------------------------------------------------------------------------------------------------------------------------|---------------------------------------|---------------------------------------------------------------------------------------------------------------------------------------------------------------------------------------------------------------------------------------------------------------|--------------------|
|                 |     |                                                                                                                                                                                                                                                                   | SPIRIT-18a<br>(iii)-PRO<br>Extension  | Specify whether more than 1 language version will be used and state whether translated versions have been developed using currently recommended methods.                                                                                                      | 8, 19-20           |
|                 |     |                                                                                                                                                                                                                                                                   | SPIRIT-18a<br>(iv)-PRO<br>Extension   | When the trial context requires someone other than a trial participant to answer on his or her behalf (a proxy-reported outcome), state and justify the use of a proxy respondent. Provide or cite evidence of the validity of proxy assessment if available. | NA                 |
|                 | 18b | Plans to promote participant retention and complete follow-up, including list of any outcome data to be collected for participants who discontinue or deviate from intervention protocols                                                                         | SPIRIT-18b<br>(i)-PRO<br>Extension    | Specify PRO data collection and management strategies for minimizing avoidable missing data.                                                                                                                                                                  | 7, 10, 21, Table 2 |
|                 |     |                                                                                                                                                                                                                                                                   | SPIRIT-18b<br>(ii)-PRO<br>Elaboration | Describe the process of PRO assessment for participants who discontinue or deviate from the assigned intervention protocol.                                                                                                                                   | 21                 |
| Data management | 19  | Plans for data entry, coding, security, and storage, including any related processes to promote data quality (eg, double data entry; range checks for data values). Reference to where details of data management procedures can be found, if not in the protocol |                                       |                                                                                                                                                                                                                                                               | 21, 23             |

1  
2  
3  
4  
5  
6  
7  
8  
9  
10  
11  
12  
13  
14  
15  
16  
17  
18  
19  
20  
21  
22  
23  
24  
25  
26  
27  
28  
29  
30  
31  
32  
33  
34  
35  
36  
37  
38  
39  
40  
41  
42  
43  
44  
45  
46

|                            |     |                                                                                                                                                                                                                                                                                                                                       |                             |                                                                                                                                                                          |        |
|----------------------------|-----|---------------------------------------------------------------------------------------------------------------------------------------------------------------------------------------------------------------------------------------------------------------------------------------------------------------------------------------|-----------------------------|--------------------------------------------------------------------------------------------------------------------------------------------------------------------------|--------|
| Statistical methods        | 20a | Statistical methods for analysing primary and secondary outcomes. Reference to where other details of the statistical analysis plan can be found, if not in the protocol                                                                                                                                                              | SPIRIT- 20a-PRO Elaboration | State PRO analysis methods, including any plans for addressing multiplicity/type I ( $\alpha$ ) error.                                                                   | 21-23  |
|                            | 20b | Methods for any additional analyses (eg, subgroup and adjusted analyses)                                                                                                                                                                                                                                                              |                             |                                                                                                                                                                          | 23     |
|                            | 20c | Definition of analysis population relating to protocol non-adherence (eg, as randomised analysis), and any statistical methods to handle missing data (eg, multiple imputation)                                                                                                                                                       | SPIRIT- 20c-PRO Elaboration | State how missing data will be described and outline the methods for handling missing items or entire assessments (eg, approach to imputation and sensitivity analyses). | 21     |
| <b>Methods: Monitoring</b> |     |                                                                                                                                                                                                                                                                                                                                       |                             |                                                                                                                                                                          |        |
| Data monitoring            | 21a | Composition of data monitoring committee (DMC); summary of its role and reporting structure; statement of whether it is independent from the sponsor and competing interests; and reference to where further details about its charter can be found, if not in the protocol. Alternatively, an explanation of why a DMC is not needed |                             |                                                                                                                                                                          | 21, 25 |

|                                 |     |                                                                                                                                                                                   |                          |                                                                                                                                                                                                                                                                                                                   |                            |
|---------------------------------|-----|-----------------------------------------------------------------------------------------------------------------------------------------------------------------------------------|--------------------------|-------------------------------------------------------------------------------------------------------------------------------------------------------------------------------------------------------------------------------------------------------------------------------------------------------------------|----------------------------|
|                                 | 21b | Description of any interim analyses and stopping guidelines, including who will have access to these interim results and make the final decision to terminate the trial           |                          |                                                                                                                                                                                                                                                                                                                   | NA                         |
| Harms                           | 22  | Plans for collecting, assessing, reporting, and managing solicited and spontaneously reported adverse events and other unintended effects of trial interventions or trial conduct | SPIRIT- 22-PRO Extension | State whether or not PRO data will be monitored during the study to inform the clinical care of individual trial participants and, if so, how this will be managed in a standardized way. Describe how this process will be explained to participants; eg, in the participant information sheet and consent form. | Table 2, Figure 2, page 21 |
| Auditing                        | 23  | Frequency and procedures for auditing trial conduct, if any, and whether the process will be independent from investigators and the sponsor                                       |                          |                                                                                                                                                                                                                                                                                                                   | NA                         |
| <b>Ethics and dissemination</b> |     |                                                                                                                                                                                   |                          |                                                                                                                                                                                                                                                                                                                   |                            |
| Research ethics approval        | 24  | Plans for seeking research ethics committee/institutional review board (REC/IRB) approval                                                                                         |                          |                                                                                                                                                                                                                                                                                                                   | 3, 24-25                   |



1  
2  
3  
4  
5  
6  
7  
8  
9  
10  
11  
12  
13  
14  
15  
16  
17  
18  
19  
20  
21  
22  
23  
24  
25  
26  
27  
28  
29  
30  
31  
32  
33  
34  
35  
36  
37  
38  
39  
40  
41  
42  
43  
44  
45  
46

|                          |     |                                                                                                                                                                                                                                  |  |  |      |
|--------------------------|-----|----------------------------------------------------------------------------------------------------------------------------------------------------------------------------------------------------------------------------------|--|--|------|
| Protocol amendments      | 25  | Plans for communicating important protocol modifications (eg, changes to eligibility criteria, outcomes, analyses) to relevant parties (eg, investigators, REC/IRBs, trial participants, trial registries, journals, regulators) |  |  | NA   |
| Consent or assent        | 26a | Who will obtain informed consent or assent from potential trial participants or authorised surrogates, and how (see Item 32)                                                                                                     |  |  | 9-10 |
|                          | 26b | Additional consent provisions for collection and use of participant data and biological specimens in ancillary studies, if applicable                                                                                            |  |  | NA   |
| Confidentiality          | 27  | How personal information about potential and enrolled participants will be collected, shared, and maintained in order to protect confidentiality before, during, and after the trial                                             |  |  | 25   |
| Declaration of interests | 28  | Financial and other competing interests for principal investigators for the overall trial and each study site                                                                                                                    |  |  | 25   |
| Access to data           | 29  | Statement of who will have access to the final trial dataset, and disclosure of contractual agreements that limit such access for investigators                                                                                  |  |  | 21   |

|                               |     |                                                                                                                                                                                                                                                                                     |  |  |    |
|-------------------------------|-----|-------------------------------------------------------------------------------------------------------------------------------------------------------------------------------------------------------------------------------------------------------------------------------------|--|--|----|
| Ancillary and post-trial care | 30  | Provisions, if any, for ancillary and post-trial care, and for compensation to those who suffer harm from trial participation                                                                                                                                                       |  |  | 21 |
| Dissemination policy          | 31a | Plans for investigators and sponsor to communicate trial results to participants, healthcare professionals, the public, and other relevant groups (eg, via publication, reporting in results databases, or other data sharing arrangements), including any publication restrictions |  |  | 25 |
|                               | 31b | Authorship eligibility guidelines and any intended use of professional writers                                                                                                                                                                                                      |  |  | 25 |
|                               | 31c | Plans, if any, for granting public access to the full protocol, participant-level dataset, and statistical code                                                                                                                                                                     |  |  | 25 |
| <b>Appendices</b>             |     |                                                                                                                                                                                                                                                                                     |  |  |    |
| Informed consent materials    | 32  | Model consent form and other related documentation given to participants and authorised surrogates                                                                                                                                                                                  |  |  | NA |

|                      |    |                                                                                                                                                                                                |  |  |    |
|----------------------|----|------------------------------------------------------------------------------------------------------------------------------------------------------------------------------------------------|--|--|----|
| Biological specimens | 33 | Plans for collection, laboratory evaluation, and storage of biological specimens for genetic or molecular analysis in the current trial and for future use in ancillary studies, if applicable |  |  | NA |
|----------------------|----|------------------------------------------------------------------------------------------------------------------------------------------------------------------------------------------------|--|--|----|

Abbreviations: SPIRIT, Standard Protocol Items: Recommendations for Interventional Trials; PRO, patient-reported outcome.

\*It is strongly recommended that this checklist be read in conjunction with the SPIRIT 2013 Explanation & Elaboration for important clarification on the items. Amendments to the protocol should be tracked and dated. The SPIRIT checklist is copyrighted by the SPIRIT Group under the Creative Commons "[Attribution-NonCommercial-NoDerivs 3.0 Unported](#)" license and is reproduced with permission.

**Spirit Item 2B** WHO Trial Registration Dataset

| Data Category                                 | Information                                                                                                                            |
|-----------------------------------------------|----------------------------------------------------------------------------------------------------------------------------------------|
| Primary registry and trial identifying number | German Clinical Trials Register<br><a href="https://www.drks.de/drks_web/">https://www.drks.de/drks_web/</a><br>Trial ID: DRKS00023978 |
| Date of registration in primary registry      | 28.12.2020                                                                                                                             |
| Secondary identifying numbers                 | Universal Trials Number (UTN): U1111-1263-1856<br>Ethics approval reference number: 1347/2020                                          |

|                                           |                                                                                                                                                                                                                                                                                                                                                                                                                                                                                  |
|-------------------------------------------|----------------------------------------------------------------------------------------------------------------------------------------------------------------------------------------------------------------------------------------------------------------------------------------------------------------------------------------------------------------------------------------------------------------------------------------------------------------------------------|
| Source(s) of monetary or material support | <p>This study is an independent academic study, which is conducted with the financial support of Celgene, a company of Bristol Myers Squibb (NA-CL-MS-PI-13909_Seebacher: Effects of actual and imagined music-cued gait training on motor functioning and brain activity in people with multiple sclerosis: a multicentre study).</p> <p>The people involved in decision-making about this funding have no influence on the planning, conduct and publication of the study.</p> |
| Primary sponsor                           | Medical University of Innsbruck, Austria                                                                                                                                                                                                                                                                                                                                                                                                                                         |
| Secondary sponsor(s)                      | N/A                                                                                                                                                                                                                                                                                                                                                                                                                                                                              |
| Contact for public queries                | <p>Dr Barbara Seebacher</p> <p>Phone: +435050482499</p> <p>Email: barbara.seebacher@i-med.ac.at</p>                                                                                                                                                                                                                                                                                                                                                                              |
| Contact for scientific queries            | <p>Dr Barbara Seebacher</p> <p>Phone: +435050482499</p> <p>Email: barbara.seebacher@i-med.ac.at</p>                                                                                                                                                                                                                                                                                                                                                                              |

|                                           |                                                                                                                                                                                                                                                                                                                                                                                                                                                                                                                                                                     |
|-------------------------------------------|---------------------------------------------------------------------------------------------------------------------------------------------------------------------------------------------------------------------------------------------------------------------------------------------------------------------------------------------------------------------------------------------------------------------------------------------------------------------------------------------------------------------------------------------------------------------|
| Public Title                              | Effects of actual and imagined music-stimulated gait training on motor functioning and brain activity in people with multiple sclerosis: a multicentre study                                                                                                                                                                                                                                                                                                                                                                                                        |
| Scientific Title                          | Effects of actual and imagined music-cued gait training on motor functioning and brain activity in people with multiple sclerosis: a multicentre study                                                                                                                                                                                                                                                                                                                                                                                                              |
| Countries of recruitment                  | Austria                                                                                                                                                                                                                                                                                                                                                                                                                                                                                                                                                             |
| Health condition(s) or problem(s) studied | Multiple sclerosis (MS)                                                                                                                                                                                                                                                                                                                                                                                                                                                                                                                                             |
| Intervention(s)                           | <p>Group 1: Motor imagery (MI) with music cueing; the music beat is accentuated using metronome cueing and intermittent verbal cueing; 30 min, 4x per week, for 4 weeks</p> <p>Group 2: MI with music cueing (the music beat is accentuated using metronome cueing and intermittent verbal cueing) plus gait training with music cueing; 15 &amp; 15 min, 4x per week, for 4 weeks</p> <p>Group 3: Gait training alone with music cueing; the music beat is accentuated using metronome cueing and intermittent verbal cueing; 30 min, 4x per week, for 4 weeks</p> |

|                                                                                                                                                                                                                                                                                                                     |                                                                                                                                                                                                                                                                                                                                                                                                                                                                                                                                                                                                                                                                                                                                                                                                                                                                                                                                                                                                                                                                                                                                        |
|---------------------------------------------------------------------------------------------------------------------------------------------------------------------------------------------------------------------------------------------------------------------------------------------------------------------|----------------------------------------------------------------------------------------------------------------------------------------------------------------------------------------------------------------------------------------------------------------------------------------------------------------------------------------------------------------------------------------------------------------------------------------------------------------------------------------------------------------------------------------------------------------------------------------------------------------------------------------------------------------------------------------------------------------------------------------------------------------------------------------------------------------------------------------------------------------------------------------------------------------------------------------------------------------------------------------------------------------------------------------------------------------------------------------------------------------------------------------|
| 1<br>2<br>3<br>4<br>5<br>6<br>7<br>8<br>9<br>10<br>11<br>12<br>13<br>14<br>15<br>16<br>17<br>18<br>19<br>20<br>21<br>22<br>23<br>24<br>25<br>26<br>27<br>28<br>29<br>30<br>31<br>32<br>33<br>34<br>35<br>36<br>37<br>38<br>39<br>40<br>41<br>42<br>43<br>44<br>45<br>46<br><br>Key inclusion and exclusion criteria | <p>Inclusion criteria: people with any MS phenotype according to the revised McDonald's criteria; aged 18 years or over; any ethnicity; disability status score on the EDSS of 2.0 to 5.0; stable disease; no evidence of disease activity; and able to speak and understand German language.</p> <p>Exclusion criteria: people with MS with concomitant diseases (such as malignant diseases, other neurological or psychiatric disorders, musculoskeletal problems affecting walking, pain, uncorrected visual or hearing impairment); cognitive impairment as defined by a MoCA cut-off score of 26/30 (&lt;26 = impaired cognition; ≥26 = intact cognition); anxiety or depression as signified by a HADS anxiety subscale score of 11/21 or a depression subscale score of 11/21 or suicidality as evaluated by a narrative screening; pregnancy; a relapse of MS within the last three months; any medication initiation or change (including corticosteroids) or any physiotherapy change within three months prior to the study; any change of symptomatic treatment affecting walking (medication or physiotherapy) or of</p> |
|---------------------------------------------------------------------------------------------------------------------------------------------------------------------------------------------------------------------------------------------------------------------------------------------------------------------|----------------------------------------------------------------------------------------------------------------------------------------------------------------------------------------------------------------------------------------------------------------------------------------------------------------------------------------------------------------------------------------------------------------------------------------------------------------------------------------------------------------------------------------------------------------------------------------------------------------------------------------------------------------------------------------------------------------------------------------------------------------------------------------------------------------------------------------------------------------------------------------------------------------------------------------------------------------------------------------------------------------------------------------------------------------------------------------------------------------------------------------|

1  
2  
3  
4  
5  
6  
7  
8  
9  
10  
11  
12  
13  
14  
15  
16  
17  
18  
19  
20  
21  
22  
23  
24  
25  
26  
27  
28  
29  
30  
31  
32  
33  
34  
35  
36  
37  
38  
39  
40  
41  
42  
43  
44  
45  
46

|                                |                                                                                                                                                                                                                                                                                                                                                                                                                                                                                                                                                                                               |
|--------------------------------|-----------------------------------------------------------------------------------------------------------------------------------------------------------------------------------------------------------------------------------------------------------------------------------------------------------------------------------------------------------------------------------------------------------------------------------------------------------------------------------------------------------------------------------------------------------------------------------------------|
|                                | <p>disease modifying treatment (DMT) during the study will lead to an exclusion of the participant from the further analysis.</p> <p>Any MRI/fMRI contraindications, e.g. implanted ferrous metal, heart pacemaker or claustrophobia.</p> <p>Healthy controls for the fMRI scanning: 15 age- and gender matched healthy controls without any history of neurological, psychiatric, orthopaedic or other disorder.</p>                                                                                                                                                                         |
| <p>Study type</p>              | <p>Prospective double-blind randomised parallel multicentre trial</p> <p>Allocation: stratified blocked randomisation with allocation concealment</p> <p>Intervention model: parallel assignment (1:1:1)</p> <p>Masking: assessor-blinded; patients blinded to the study hypotheses</p> <p>Primary study aim: to investigate whether there is a difference between the effects of accentuated music- and verbally cued MI, accentuated music- and verbally cued MI combined with gait training and accentuated music- and verbally cued gait training alone on walking in people with MS.</p> |
| <p>Date of first enrolment</p> | <p>09.02.2021</p>                                                                                                                                                                                                                                                                                                                                                                                                                                                                                                                                                                             |

|                    |                                                                                                                                                                                                                                                                                                                                                                                                                                                                                                                                                                                                                                                                                                                                      |
|--------------------|--------------------------------------------------------------------------------------------------------------------------------------------------------------------------------------------------------------------------------------------------------------------------------------------------------------------------------------------------------------------------------------------------------------------------------------------------------------------------------------------------------------------------------------------------------------------------------------------------------------------------------------------------------------------------------------------------------------------------------------|
| Target sample size | 132 people with MS and 15 healthy controls (fMRT)                                                                                                                                                                                                                                                                                                                                                                                                                                                                                                                                                                                                                                                                                    |
| Recruitment status | Recruiting                                                                                                                                                                                                                                                                                                                                                                                                                                                                                                                                                                                                                                                                                                                           |
| Primary outcome(s) | <ul style="list-style-type: none"> <li>• Walking speed as assessed by the Timed 25-Foot Walk (T25FW)</li> <li>• Walking distance as assessed by the 2-Minute Walk Test (2MWT)</li> </ul>                                                                                                                                                                                                                                                                                                                                                                                                                                                                                                                                             |
| Secondary outcomes | <ul style="list-style-type: none"> <li>• Brain activation patterns as assessed by fMRI (and structural MRI); in addition to patients, healthy controls will be scanned at baseline and 4 weeks later, corresponding with the intervention period of this study</li> <li>• MS related fatigue as assessed by the validated German version of the Neurological Fatigue Index (NFI-MS)</li> <li>• MS related health-related QoL, HRQoL as assessed by the validated German version of the Multiple Sclerosis International Quality of Life (MusiQoL) questionnaire</li> <li>• MI ability as measured by the validated German version KVIQ-G-10 of the Kinaesthetic and Visual Imagery Questionnaire, short version (KVIQ-10)</li> </ul> |



1  
2  
3  
4  
5  
6  
7  
8  
9  
10  
11  
12  
13  
14  
15  
16  
17  
18  
19  
20  
21  
22  
23  
24  
25  
26  
27  
28  
29  
30  
31  
32  
33  
34  
35  
36  
37  
38  
39  
40  
41  
42  
43  
44  
45  
46

|  |                                                                                                                                                                                                                                                                                                                                                                                                                                                                                                                                                                                                                                                                                                                                                                                                                                                                                                                                                                                         |
|--|-----------------------------------------------------------------------------------------------------------------------------------------------------------------------------------------------------------------------------------------------------------------------------------------------------------------------------------------------------------------------------------------------------------------------------------------------------------------------------------------------------------------------------------------------------------------------------------------------------------------------------------------------------------------------------------------------------------------------------------------------------------------------------------------------------------------------------------------------------------------------------------------------------------------------------------------------------------------------------------------|
|  | <ul style="list-style-type: none"><li>• MI ability as measured by a mental chronometry test comparing the duration of imagined and real walking on a 6-metre walkway</li><li>• Anxiety and depression as assessed by the German version of the HADS, complemented by additional narrative screening for suicidality</li><li>• Global cognitive impairment as assessed by the German version of the Montreal Cognitive Assessment (MoCA)</li><li>• Psychomotor speed, attention, visual scanning and tracking and working memory as assessed by the Symbol Digit Modalities Test (SDMT)</li><li>• Music-induced motivation / the motivational qualities of music as assessed by the Brunel Music Rating Inventory-2 (BMRI-2)</li><li>• Music-induced pleasure and arousal as assessed by the Pictorial Self-Assessment Manikin (SAM)</li><li>• MS specific self-efficacy as assessed by the validated German version of the Unidimensional Self-Efficacy Scale for MS (USE-MS)</li></ul> |
|--|-----------------------------------------------------------------------------------------------------------------------------------------------------------------------------------------------------------------------------------------------------------------------------------------------------------------------------------------------------------------------------------------------------------------------------------------------------------------------------------------------------------------------------------------------------------------------------------------------------------------------------------------------------------------------------------------------------------------------------------------------------------------------------------------------------------------------------------------------------------------------------------------------------------------------------------------------------------------------------------------|

- |  |                                                                                                                                                                                                                                                                                                                                                                                                                                                                                                                                                                                                                                                                                                  |
|--|--------------------------------------------------------------------------------------------------------------------------------------------------------------------------------------------------------------------------------------------------------------------------------------------------------------------------------------------------------------------------------------------------------------------------------------------------------------------------------------------------------------------------------------------------------------------------------------------------------------------------------------------------------------------------------------------------|
|  | <ul style="list-style-type: none"><li>• Number of falls in the intervention and follow-up periods (falls log, telephone interviews)</li><li>• Home-based training management and coping, barriers to, facilitators of and problems with the training, documentation of the training frequency and duration (support will be provided) (weekly semi-structured telephone interviews during the intervention period)</li><li>• Feedback on the general health status, walking, fatigue, training content and suggestions for adaptations of the intervention in a potential follow-up study, falls and documentation of falls (semi-structured telephone interview at 4-weeks follow-up)</li></ul> |
|--|--------------------------------------------------------------------------------------------------------------------------------------------------------------------------------------------------------------------------------------------------------------------------------------------------------------------------------------------------------------------------------------------------------------------------------------------------------------------------------------------------------------------------------------------------------------------------------------------------------------------------------------------------------------------------------------------------|

# BMJ Open

## EFFECTS OF ACTUAL AND IMAGINED MUSIC-CUED GAIT TRAINING ON MOTOR FUNCTIONING AND BRAIN ACTIVITY IN PEOPLE WITH MULTIPLE SCLEROSIS: PROTOCOL OF A RANDOMISED PARALLEL MULTICENTRE TRIAL

|                                 |                                                                                                                                                                                                                                                                                                                                                                                                                                                                                                                                                                                                                                                                                                                                                                                                                                                                                                                                                                                                                                                                                                                                                                                                                                                                                                                                                                                                                      |
|---------------------------------|----------------------------------------------------------------------------------------------------------------------------------------------------------------------------------------------------------------------------------------------------------------------------------------------------------------------------------------------------------------------------------------------------------------------------------------------------------------------------------------------------------------------------------------------------------------------------------------------------------------------------------------------------------------------------------------------------------------------------------------------------------------------------------------------------------------------------------------------------------------------------------------------------------------------------------------------------------------------------------------------------------------------------------------------------------------------------------------------------------------------------------------------------------------------------------------------------------------------------------------------------------------------------------------------------------------------------------------------------------------------------------------------------------------------|
| Journal:                        | <i>BMJ Open</i>                                                                                                                                                                                                                                                                                                                                                                                                                                                                                                                                                                                                                                                                                                                                                                                                                                                                                                                                                                                                                                                                                                                                                                                                                                                                                                                                                                                                      |
| Manuscript ID                   | bmjopen-2021-056666.R1                                                                                                                                                                                                                                                                                                                                                                                                                                                                                                                                                                                                                                                                                                                                                                                                                                                                                                                                                                                                                                                                                                                                                                                                                                                                                                                                                                                               |
| Article Type:                   | Protocol                                                                                                                                                                                                                                                                                                                                                                                                                                                                                                                                                                                                                                                                                                                                                                                                                                                                                                                                                                                                                                                                                                                                                                                                                                                                                                                                                                                                             |
| Date Submitted by the Author:   | 05-Dec-2021                                                                                                                                                                                                                                                                                                                                                                                                                                                                                                                                                                                                                                                                                                                                                                                                                                                                                                                                                                                                                                                                                                                                                                                                                                                                                                                                                                                                          |
| Complete List of Authors:       | Seebacher, Barbara; Medical University of Innsbruck, Clinical Department of Neurology; Karl Landsteiner Institute for Interdisciplinary Rehabilitation Research, Muenster<br>Helmlinger, Birgit; Medical University of Graz, Department of Neurology; Medical University of Graz, Department of Neurology, Research Unit for Neuronal Plasticity and Repair<br>Pinter, Daniela; Medical University of Graz, Department of Neurology; Medical University of Graz, Department of Neurology, Research Unit for Neuronal Plasticity and Repair<br>Ehling, Rainer; Clinic for Rehabilitation Münster, Department of Neurology; Karl Landsteiner Institute for Interdisciplinary Rehabilitation Research, Muenster<br>Hegen, Harald; Medical University of Innsbruck, Clinical Department of Neurology<br>Ropele, Stefan; Medical University of Graz, Department of Neurology<br>Reishofer, Gernot; Medical University of Graz, Department of Radiology, Division of Neuroradiology, Vascular and Interventional Radiology<br>Enzinger, Chris; Medical University of Graz, Department of Neurology; Division of Neuroradiology; Department of Radiology<br>Brenneis, Christian; Clinic for Rehabilitation Münster, Department of Neurology; Karl Landsteiner Institute for Interdisciplinary Rehabilitation Research, Muenster<br>Deisenhammer, Florian; Medical University of Innsbruck, Clinical Department of Neurology |
| <b>Primary Subject Heading</b>: | Neurology                                                                                                                                                                                                                                                                                                                                                                                                                                                                                                                                                                                                                                                                                                                                                                                                                                                                                                                                                                                                                                                                                                                                                                                                                                                                                                                                                                                                            |
| Secondary Subject Heading:      | Rehabilitation medicine, Neurology                                                                                                                                                                                                                                                                                                                                                                                                                                                                                                                                                                                                                                                                                                                                                                                                                                                                                                                                                                                                                                                                                                                                                                                                                                                                                                                                                                                   |
| Keywords:                       | Multiple sclerosis < NEUROLOGY, REHABILITATION MEDICINE, NEUROLOGY                                                                                                                                                                                                                                                                                                                                                                                                                                                                                                                                                                                                                                                                                                                                                                                                                                                                                                                                                                                                                                                                                                                                                                                                                                                                                                                                                   |
|                                 |                                                                                                                                                                                                                                                                                                                                                                                                                                                                                                                                                                                                                                                                                                                                                                                                                                                                                                                                                                                                                                                                                                                                                                                                                                                                                                                                                                                                                      |

1  
2  
3  
4  
5  
6  
7  
8  
9  
10  
11  
12  
13  
14  
15  
16  
17  
18  
19  
20  
21  
22  
23  
24  
25  
26  
27  
28  
29  
30  
31  
32  
33  
34  
35  
36  
37  
38  
39  
40  
41  
42  
43  
44  
45  
46  
47  
48  
49  
50  
51  
52  
53  
54  
55  
56  
57  
58  
59  
60

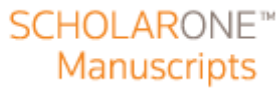

1  
2  
3 1 **EFFECTS OF ACTUAL AND IMAGINED MUSIC-CUED GAIT TRAINING ON**  
4  
5 2 **MOTOR FUNCTIONING AND BRAIN ACTIVITY IN PEOPLE WITH MULTIPLE**  
6  
7 3 **SCLEROSIS: PROTOCOL OF A RANDOMISED PARALLEL MULTICENTRE**  
8  
9 4 **TRIAL**  
10  
11  
12  
13  
14

15 6 **Barbara Seebacher<sup>1,4</sup>, Birgit Helmlinger<sup>2,3</sup>, Daniela Pinter<sup>2,3</sup>, Rainer Ehling<sup>4, 5</sup>,**  
16  
17 7 **Harald Hegen<sup>1</sup>, Stefan Ropele<sup>2</sup>, Gernot Reishofer<sup>6</sup>, Christian Enzinger<sup>2,3,6</sup>,**  
18  
19 8 **Christian Brenneis<sup>4, 5</sup>, Florian Deisenhammer<sup>1</sup>**  
20  
21  
22  
23  
24

25 10 <sup>1</sup>Clinical Department of Neurology, Medical University of Innsbruck, Austria

26  
27 11 <sup>2</sup>Department of Neurology, Medical University of Graz, Austria

28  
29  
30 12 <sup>3</sup>Department of Neurology, Research Unit for Neuronal Plasticity and Repair, Medical  
31  
32 13 University of Graz, Austria

33  
34  
35 14 <sup>4</sup>Karl Landsteiner Institute for Interdisciplinary Rehabilitation Research, Muenster,  
36  
37 15 Austria

38  
39 16 <sup>5</sup>Department of Neurology, Clinic for Rehabilitation Muenster, Austria

40  
41 17 <sup>6</sup>Department of Radiology, Division of Neuroradiology, Vascular and Interventional  
42  
43 18 Radiology, Medical University of Graz

44  
45  
46  
47  
48 20 Correspondence to Dr Barbara Seebacher, Clinical Department of Neurology,  
49  
50 21 Medical University of Innsbruck, Anichstrasse 35, 6020 Innsbruck, Austria; phone  
51  
52 22 +43.50.504.24363; fax: +43.050.504.24230; email barbara.seebacher@i-med.ac.at  
53  
54

55  
56  
57  
58 24  
59  
60 25 Word count: 4277 words (without Acknowledgements to References sections).

## 26 **ABSTRACT**

### 27 **Introduction**

28 Motor imagery (MI) refers to the mental rehearsal of a physical action without  
29 muscular activity. Our previous studies showed that MI combined with rhythmic-  
30 auditory cues improved walking, fatigue and quality of life (QoL) in people with  
31 multiple sclerosis (pwMS). Largest improvements were seen after music- and  
32 verbally cued MI. It is unclear whether actual cued gait training achieves similar  
33 effects on walking as cued MI in pwMS. Furthermore, in pwMS it is unknown whether  
34 any of these interventions leads to changes in brain activation. The purpose of this  
35 study is therefore to compare the effects of imagined and actual cued gait training  
36 and a combination thereof on walking, brain activation patterns, fatigue, cognitive and  
37 emotional functioning in pwMS.

### 38 **Methods and analysis**

39 A prospective double-blind randomised parallel multicentre trial will be conducted in  
40 132 pwMS with mild to moderate disability. Randomised into three groups,  
41 participants will receive music-, metronome- and verbal cueing, plus MI of walking  
42 (1), MI combined with actual gait training (2), or actual gait training (3) for 30 minutes,  
43 4x per week for 4 weeks. Supported by weekly phone calls, participants will practise  
44 at home, guided by recorded instructions. Primary endpoints will be walking speed  
45 (Timed 25-Foot Walk) and distance (2-Minute Walk Test). Secondary endpoints will  
46 be brain activation patterns, fatigue, QoL, MI ability, anxiety, depression, cognitive  
47 functioning, music-induced motivation-to-move, pleasure, arousal and self-efficacy.  
48 Data will be collected at baseline, post-intervention and 3-month follow-up. MRI  
49 reference values will be generated using 15 matched healthy controls.

### 50 **Ethics and dissemination**

1  
2  
3 51 This study follows the SPIRIT-PRO Extension. Ethical approval was received from  
4  
5 52 the Ethics Committees of the Medical Universities of Innsbruck (1347/2020) and Graz  
6  
7 53 (33-056 ex 20/21), Austria. Results will be disseminated via national and international  
8  
9 54 conferences and published in peer-reviewed journals.  
10  
11

12 55 **Trial registration number** German Clinical Trials Register, DRKS00023978.  
13  
14

15 56

16  
17  
18 57 **Study protocol, first revision, 5.12.2021**

19  
20 58 **Keywords:** Multiple sclerosis, Music, Cues, Motor Imagery, Walking, Fatigue,  
21  
22 59 Rehabilitation, fMRI.  
23  
24

25 60  
26  
27  
28  
29  
30  
31  
32  
33  
34  
35  
36  
37  
38  
39  
40  
41  
42  
43  
44  
45  
46  
47  
48  
49  
50  
51  
52  
53  
54  
55  
56  
57  
58  
59  
60

## 61 **ARTICLE SUMMARY**

### 62 **Strengths and limitations of this study**

- 63 • This is the first prospective double-blind randomised parallel multicentre trial to  
64 investigate the effects of imagined and actual gait training with music-,  
65 metronome- and verbal cueing versus a combination thereof in people with MS  
66 (pwMS).
- 67 • The intervention of this study was informed by previous study results and  
68 involvement of patients with multiple sclerosis (MS).
- 69 • Study participants with MS will receive close individual telephone support of  
70 their home-based training to facilitate their motor learning and adherence.
- 71 • Semi-structured telephone interviews will assist in gaining insight into  
72 participants' perspectives of the intervention.
- 73 • Subjective and objective assessments and functional magnetic resonance  
74 imaging will be used as outcome parameters.



## 77 INTRODUCTION

78 Multiple Sclerosis (MS) is a chronic inflammatory demyelinating disease of the central  
79 nervous system leading to disability accumulation. People with MS (pwMS) frequently  
80 have impairment in motor, sensory, visual and other functional systems.<sup>1</sup> Walking  
81 impairment and fatigue contribute to a limitation in quality of life (QoL).<sup>2-4</sup> Motor  
82 imagery (MI)<sup>5</sup> and rhythmic-auditory stimulation, or cueing<sup>6-9</sup> are specific  
83 physiotherapy interventions. Rhythmic-auditory cues facilitate cyclical movements,  
84 predominantly gait,<sup>6</sup> which can be provided either by a metronome or music beat,<sup>7 8</sup> a  
85 combination thereof,<sup>9</sup> or by rhythmic verbal cues.<sup>10 11</sup> Cued walking training has been  
86 found to improve walking in people with neurological diseases including MS.<sup>12-16</sup> The  
87 stimulation leads to interactions between sensory and motor processes, referred to  
88 as sensorimotor interaction.<sup>17</sup>

89 MI is the mental execution of a movement without its actual performance<sup>18</sup> and MI of  
90 walking activates brain areas similar to those in actual walking.<sup>19 20</sup> Different imagery  
91 models exist and include individual and group MI, with or without physical practice.<sup>21</sup>  
92 Jeannerod has distinguished between an internal and an external MI perspective.<sup>22</sup>  
93 Further, a visual and a kinaesthetic MI mode have been described.<sup>23</sup> Persons  
94 imagine watching themselves moving with visual MI, with the kinaesthetic mode, they  
95 feel themselves moving.<sup>24</sup>

96 Few small studies have explored rhythmic-cued gait training<sup>15 16</sup> or MI of walking<sup>25 26</sup>  
97 in pwMS, showing promising preliminary results. Results from our previous work  
98 showed superior effects of music- and verbally cued MI over non-cued MI on walking,  
99 fatigue and QoL.<sup>27 28</sup> So far, no studies have compared the effects of cued MI on  
100 walking and cued gait training or a combined cued MI and gait training in pwMS.  
101 Building on the promising results of our previous studies, we furthermore want to learn  
102 whether observed behavioural changes are reflected by changes in brain activation

1  
2  
3 103 patterns. Magnetic resonance imaging (MRI) has been suggested to contribute to the  
4  
5 104 understanding of mechanisms behind motor deficits and functional recovery in  
6  
7  
8 105 pwMS.<sup>29 30</sup> So far, functional MRI studies on motor rehabilitation in pwMS are scarce  
9  
10 106 and,<sup>29 31</sup> to our knowledge, brain activation changes due to specific walking training  
11  
12 107 need to be further explored in pwMS. Extending the study by Tavazzi et al.,<sup>29</sup> who  
13  
14 108 showed a reduced extent of the widespread brain activation during a motor task  
15  
16 109 (plantar dorsiflexion) after gait rehabilitation in pwMS, we will assess potential changes  
17  
18 110 in brain activation associated with cued MI and/or cued gait training. In line, beneficial  
19  
20 111 training might be associated with an increased activation of the primary motor areas,  
21  
22 112 along with decreased activation outside the sensorimotor network (e.g., frontal  
23  
24 113 areas).<sup>29 32 33</sup> We expect that MI training leads to similar neural reorganisation patterns  
25  
26 114 as actual practice.<sup>34</sup>

27  
28  
29  
30 115 Therefore, the purpose of this study is to determine the effects of actual and imagined  
31  
32 116 rhythmic-cued gait training versus their combination on walking, cognitive and  
33  
34 117 emotional functioning in pwMS. Further aims are to compare brain activation changes  
35  
36 118 during a motor or MI task between groups and determine which changes are  
37  
38 119 specifically associated with improvements in gait function.

## 41 120 **ALTERNATIVE HYPOTHESES**

42  
43  
44 121 H1: All trainings will significantly improve walking, fatigue, QoL, emotional and  
45  
46 122 cognitive functioning, and normalise brain activation (i.e., a more focal activation of the  
47  
48 123 sensorimotor network as observed in healthy controls) in pwMS.

49  
50  
51 124 H2: The effects of cued MI combined with cued gait training are superior to those of  
52  
53 125 cued MI and cued gait training alone.

## 54 126 **METHODS AND ANALYSES**

### 55 56 127 **Study design, setting and timeline**

1  
2  
3 128 This study is designed as a multicentre, randomised, parallel, double-blind trial in  
4  
5 129 pwMS with mild to moderate disability and follows the SPIRIT 2013 and SPIRIT-PRO  
6  
7 130 Extension Checklist (Supplemental File 1). Study results will be reported in  
8  
9 131 accordance with the Consolidated Standards of Reporting Statement (CONSORT).<sup>35</sup>  
10  
11  
12 132 The study will be conducted at the Clinical Department of Neurology, Medical  
13  
14 133 Universities of Innsbruck (Centre 1) and Graz (Centre 3) and Clinic for Rehabilitation  
15  
16 134 Muenster (Centre 2), Austria. The expected recruitment phase is from 01.02.2021 to  
17  
18 135 31.03.2023.

### 136 **Patient and public involvement**

137 The study intervention was developed based on previous study results<sup>27 28 36 37</sup> and  
138 patient involvement. An MS advisory group was consulted to clarify any questions, for  
139 example, with respect to their music preference and suggestions for the duration of  
140 the imagined and actual gait training. Semi-structured telephone interviews will be  
141 used to gain insight into patients' problems with and acceptability of the intervention.  
142 Patients' acceptance of the intervention is essential for adherence.

### 143 **Sample size and participants**

144 The sample size for this study was calculated using previous study data<sup>27</sup> and  
145 Cohen's d effect sizes of the walking distance endpoint, with 95% confidence interval  
146 (CI) and corrected estimates of pooled standard deviation. Based on 80% power  
147 ( $\beta=0.2$ ),  $\alpha=0.025$  and conservative effect sizes of  $d=0.74$ , a sample size of 37  
148 participants per group is required to detect a between-group difference. Including  
149 15% attrition and making the number divisible by 3, a total sample size of 132  
150 participants results. Thereof, 36 patients will also undergo MRI scanning, while 15  
151 healthy controls will be enrolled to provide reference values for the MRI analyses.  
152 Study procedures including screening for eligibility are presented in Supplemental  
153 Figure 1 (Flow Diagram).

154 Eligibility criteria for this study are listed in Table 1.

155 **Table 1** Eligibility criteria

| People with MS | Inclusion criteria                                                                                                                                                                                                                                                                                                                                                                                                                                                                                                                                                                                                                                                                                               |
|----------------|------------------------------------------------------------------------------------------------------------------------------------------------------------------------------------------------------------------------------------------------------------------------------------------------------------------------------------------------------------------------------------------------------------------------------------------------------------------------------------------------------------------------------------------------------------------------------------------------------------------------------------------------------------------------------------------------------------------|
|                | <ul style="list-style-type: none"> <li>• any MS phenotype according to the revised McDonald's criteria<sup>38 39</sup></li> <li>• aged 18 years or older</li> <li>• any ethnicity</li> <li>• disability status score on the Expanded Disability Status Scale (EDSS)<sup>40</sup> of 2.0 to 5.0</li> <li>• stable disease; no clinical evidence of disease activity</li> <li>• ability to speak and understand German language</li> </ul>                                                                                                                                                                                                                                                                         |
|                | <p><b>Exclusion criteria</b></p> <ul style="list-style-type: none"> <li>• significant concomitant diseases (such as malignant diseases, other neurological or psychiatric disorders, musculoskeletal problems affecting walking, pain, uncorrected visual or hearing impairment)</li> <li>• cognitive impairment as defined by a MoCA cut-off score of 26/30 (&lt;26 = impaired cognition)<sup>41</sup></li> <li>• anxiety or depression as signified by a HADS anxiety<sup>42</sup> or depression subscale score of 11/21<sup>43</sup> or suicidality as evaluated by a narrative screening<sup>44</sup></li> <li>• pregnancy</li> <li>• relapse of MS within the last three months before the study</li> </ul> |

|                                   |                                                                                                                                                                                                                                                                                                                                                                                                                                                                                                                        |
|-----------------------------------|------------------------------------------------------------------------------------------------------------------------------------------------------------------------------------------------------------------------------------------------------------------------------------------------------------------------------------------------------------------------------------------------------------------------------------------------------------------------------------------------------------------------|
|                                   | <ul style="list-style-type: none"> <li>• any medication initiation or change (including corticosteroids) or any physiotherapy change or inpatient rehabilitation within three months prior to the study</li> <li>• any change of symptomatic treatment affecting walking (medication or physiotherapy) or of disease modifying treatment during the study will lead to an exclusion of the participant from further analysis</li> </ul>                                                                                |
| <b>Healthy controls</b>           | <ul style="list-style-type: none"> <li>• age- and gender-matched</li> <li>• without any history of neurological, psychiatric, or orthopaedic disorders</li> </ul>                                                                                                                                                                                                                                                                                                                                                      |
| <b>MRI/fMRI contraindications</b> | <ul style="list-style-type: none"> <li>• metallic or electricity conducting implants or prostheses (cardiac pacemaker, insulin pump, middle-ear implants, heart valve or hip prostheses, artificial teeth, hearing aid etc.) in or on the body</li> <li>• non-removable metal parts (coil, braces etc.) or metal shrapnel in or on the body</li> <li>• tattoos in the head or neck area, nicotine plasters or cosmetic eye modifications</li> <li>• pregnancy</li> <li>• epilepsy</li> <li>• claustrophobia</li> </ul> |

156 EDSS, Expanded Disability Status Scale;<sup>40</sup> HADS, Hospital and Anxiety and

157 Depression Scale;<sup>45</sup> MoCA, Montreal Cognitive Assessment;<sup>46</sup> MS, multiple sclerosis

158 **Recruitment, randomisation and blinding**

1  
2  
3 159 Information brochures and invitations for study participation will be displayed in the  
4  
5 160 study Centres 1-3 and on the Austrian MS Society website, with pwMS notified about  
6  
7 161 the study by clinical department staff. Written informed consent will be obtained from  
8  
9 162 all participants (see Supplemental File 2 for an English version of the patient  
10  
11 163 information sheet and informed consent form). Healthy controls will be enrolled at  
12  
13  
14 164 Centre 3 only.

15  
16  
17 165 Patients fulfilling the eligibility criteria will be randomised into one of three groups with  
18  
19 166 stratified blocked randomisation performed by an independent researcher at Centre 1  
20  
21 167 using an online software-based random number generator (Sealed Envelope,  
22  
23 168 London, UK), blocks of prespecified size and 1:1:1 allocation. Stratification will be  
24  
25 169 performed according to relevant predictive factors for a change in walking i.e.,<sup>47</sup> age  
26  
27 170 (<40, ≥40), gender (female, male)<sup>48 49</sup> and disability (EDSS<sup>40</sup> 2.0–3.5, 4.0–5.0).

28  
29  
30 171 Sequentially numbered sealed opaque envelopes including group allocation numbers  
31  
32 172 for groups 1-3 will be fabricated for each stratum. Allocation concealment will be  
33  
34 173 performed to avoid allocation bias, assessors blinded to participants' group allocation  
35  
36 174 and participants unaware of the study hypotheses.

### 37 38 39 40 175 **Intervention**

41  
42 176 Three intervention groups will receive home-based kinaesthetic MI and/or gait  
43  
44 177 training with music-, metronome- and verbal cueing for a total of 30 minutes, 4 times  
45  
46 178 per week, for 4 weeks. Participants will receive cued MI (Group 1), combined cued MI  
47  
48 179 and gait training (Group 2) or cued gait training (Group 3).

49  
50  
51 180 An audio-mix has been created specifically for this study (Audacity®. Version 3.0.0)<sup>50</sup>  
52  
53 181 for download on participants' electronic devices or available as study CDs (Group 1).  
54  
55 182 Instrumental motivational music at a regular beat in a 2/4 or 4/4 metre and strong ON  
56  
57 183 and OFF beat patterns (i.e., with every first or first and third music beats stressed)  
58  
59 184 will be utilised.<sup>6 51 52</sup> Additionally, metronome cues will accentuate the music beat and  
60

1  
2  
3 185 tempo and support gait synchronisation with the beat. Verbal cueing will be employed  
4  
5 186 as a reminder of the task to practise and aid participants' focus on the respective  
6  
7 187 body parts e.g., the feet.

8  
9  
10 188 Suitable rhythmical sequences at 80-120 beats per minute will be cut and mixed with  
11  
12 189 instructions on MI or gait training. Rhythmic-verbal cues will accentuate the cueing  
13  
14 190 intermittently, for example using "step-step" or "toe-off",<sup>53</sup> with different walking tasks  
15  
16 191 used. Familiarisation will occur individually with the rhythmic-cued MI and gait training  
17  
18 192 as previously recommended.<sup>21 54</sup> The audio mix will be changed weekly to gradually  
19  
20 193 increase the tempo and facilitate adherence. The PETTLEP approach to MI will be  
21  
22 194 applied, involving the "Physical, Environmental, Task, Timing, Learning, Emotional,  
23  
24 195 and Perspective" components of MI.<sup>55</sup> Using the template for intervention description  
25  
26 196 and replication (TIDieR) checklist,<sup>56</sup> detailed information on the PETTLEP approach  
27  
28 197 and intervention is provided in Supplemental Table 1. In Figure 1, key aspects of the  
29  
30 198 intervention are presented.

31  
32  
33  
34  
35 199 *Figure 1 around here*

36  
37 200 **Figure 1** Key elements of the intervention in the three groups

38  
39 201 Practice frequency will be noted in a diary with weekly reports on participants' practice  
40  
41 202 frequency prepared. Weekly phone calls will be used in the homebased training  
42  
43 203 support of all participants, additionally at 4-weeks post-intervention. Additional phone  
44  
45 204 call support will be provided upon request by the intervention providers. The content of  
46  
47 205 the semi-structured telephone interviews during and post-intervention is presented in  
48  
49 206 Figure 2 and Supplemental File 3.

50  
51  
52  
53 207 *Figure 2 around here*

54  
55 208 **Figure 2** Content of semi-structured interviews

56  
57 209 **Data collection**

1  
2  
3 210 Demographic and disease specific data will be collected as detailed in Table 2. Three  
4  
5 211 categories of disease modifying treatment (DMT) will be operationalised according to  
6  
7 212 the disease activity and course (1) no DMTs; (2) moderately effective and (3) highly  
8  
9 213 DMTs (active substances are detailed below Table 2). DMTs will be recorded and  
10  
11 214 handled as a covariate in the data analysis because they may affect the primary and  
12  
13 215 secondary outcomes. Clinical data will be collected by trained and blinded assessors  
14  
15 216 (physiotherapists, occupational therapists, sports scientists, and psychologists), with  
16  
17 217 the order of the patient-reported outcome measures being randomised for each  
18  
19 218 participant and visit to minimise order effects. A schedule of the study procedures is  
20  
21  
22  
23  
24 219 provided in Table 2.  
25  
26  
27  
28  
29  
30  
31  
32  
33  
34  
35  
36  
37  
38  
39  
40  
41  
42  
43  
44  
45  
46  
47  
48  
49  
50  
51  
52  
53  
54  
55  
56  
57  
58  
59  
60



220 **Table 2** Schedule of study procedures

|                                              | STUDY PERIOD |            |                        |                                  |                                |                           |
|----------------------------------------------|--------------|------------|------------------------|----------------------------------|--------------------------------|---------------------------|
|                                              | Enrolment    | Allocation | Post-allocation        |                                  |                                |                           |
|                                              | Screening    |            | Baseline test<br>Day 1 | Post-intervention test<br>Week 4 | Follow-up phone call<br>Week 8 | Follow-up test<br>Month 3 |
| TIMEPOINT                                    | $-T_1$       | $0$        | $T_1$                  | $T_2$                            | $T_3$                          | $T_4$                     |
| <b>ENROLMENT</b>                             |              |            |                        |                                  |                                |                           |
| Eligibility screen                           | X            |            |                        |                                  |                                |                           |
| Informed consent                             | X            |            |                        |                                  |                                |                           |
| Allocation                                   |              | X          |                        |                                  |                                |                           |
| <b>INTERVENTIONS</b>                         |              |            |                        |                                  |                                |                           |
| <i>Music-cued MI group</i>                   |              |            | ←————→                 |                                  |                                |                           |
| <i>Music-cued MI and gait training group</i> |              |            | ←————→                 |                                  |                                |                           |
| <i>Music-cued gait training group</i>        |              |            | ←————→                 |                                  |                                |                           |

|                                                                                                                 |   |   |   |  |   |
|-----------------------------------------------------------------------------------------------------------------|---|---|---|--|---|
| <b>OUTCOMES (ASSESSMENTS)</b>                                                                                   |   |   |   |  |   |
| <b>Baseline variables</b>                                                                                       |   |   |   |  |   |
| <i>Demographics (age, gender)</i>                                                                               | X |   |   |  |   |
| <i>Clinical characteristics (EDSS, MS phenotype, disease duration, disease modifying treatment<sup>1</sup>)</i> | X |   |   |  |   |
| <i>Global cognitive impairment (MoCA test)</i>                                                                  | X |   | X |  | X |
| <i>Anxiety and depression (HADS)</i>                                                                            | X |   | X |  | X |
| <i>Suicidality (narrative screening)</i>                                                                        | X |   | X |  | X |
| <b>Primary outcomes</b>                                                                                         |   |   |   |  |   |
| <i>Walking speed and distance (T25FW, 2MWT)</i>                                                                 |   | X | X |  | X |
| <b>Secondary outcomes</b>                                                                                       |   |   |   |  |   |
| <i>Brain activation patterns (fMRI)</i>                                                                         |   | X | X |  |   |
| <i>MS related fatigue (NFI-MS)</i>                                                                              |   | X | X |  | X |
| <i>Health-related QoL (MusiQoL)</i>                                                                             |   | X | X |  | X |
| <i>MI ability (KVIQ-10, mental chronometry test)</i>                                                            |   | X | X |  | X |
| <i>Cognitive functioning (SDMT)</i>                                                                             |   | X | X |  | X |

|                                                                                                                      |  |  |        |   |   |   |
|----------------------------------------------------------------------------------------------------------------------|--|--|--------|---|---|---|
| <i>Music-induced motivation in exercise (BMRI-II)</i>                                                                |  |  | X      | X |   | X |
| <i>Music-induced pleasure &amp; arousal (SAM)</i>                                                                    |  |  |        | X |   |   |
| <i>MS specific self-efficacy (USE-MS)</i>                                                                            |  |  |        |   |   |   |
| <i>Adverse events and adverse reactions (log)</i>                                                                    |  |  |        | X | X | X |
| <i>Falls (log)</i>                                                                                                   |  |  |        | X | X | X |
| <i>Acceptability of the intervention, adherence and coping (checklist, weekly semi-structured phone interviews)</i>  |  |  | ←————→ |   |   |   |
| <i>Self-report health status and feedback on the study intervention (follow-up semi-structured phone interviews)</i> |  |  |        |   | X |   |

1  
2  
3  
4  
5  
6  
7  
8  
9  
10  
11  
12  
13  
14  
15  
16  
17  
18  
19  
20  
21  
22  
23  
24 221 <sup>1</sup>Three categories of disease modifying treatment (DMT): (1) no DMTs; (2) moderately effective DMTs: interferon-b 1a and 1b,  
25  
26 222 pegylated interferon-b 1a, glatiramer acetate, dimethyl fumarate, teriflunomide, azathioprine, intravenous immunoglobulins; (3) highly  
27  
28 223 effective DMTs: alemtuzumab, cladribine, fingolimod, natalizumab, ocrelizumab, cyclophosphamide, mitoxantrone, rituximab,  
29  
30 224 siponimod, ofatumumab, and ozanimod.<sup>57</sup>  
31  
32  
33 225 BMRI-II, Brunel Music-Rating Inventory-II; EDSS, Expanded Disability Status Scale; fMRI, functional magnetic resonance imaging;  
34  
35  
36 226 HADS, Hospital Anxiety and Depression Scale; KVIQ-10, Kinaesthetic and Visual Imagery Questionnaire, short version; MI, motor  
37  
38 227 imagery; MoCA, Montreal Cognitive Assessment; MS, multiple sclerosis; MusiQoL, Multiple Sclerosis International Quality of Life; NFI-  
39  
40  
41  
42  
43  
44  
45  
46

1  
2  
3  
4  
5  
6  
7  
8  
9  
10  
11  
12  
13  
14  
15  
16  
17  
18  
19  
20  
21  
22  
23  
24  
25  
26  
27  
28  
29  
30  
31  
32  
33  
34  
35  
36  
37  
38  
39  
40  
41  
42  
43  
44  
45  
46

228 MS, Neurological Fatigue Index - Multiple Sclerosis; SAM, Self-Assessment Manikin; SDMT, Symbol Digit Modalities Test; T25FW,  
229 Timed 25-Foot Walk; USE-MS, Unidimensional Self-Efficacy Scale for Multiple Sclerosis; 2MWT, 2-Minute Walk Test.

For peer review only

## 230 **Primary outcomes**

231 Primary outcomes are walking speed as assessed by the Timed 25-Foot Walk  
232 (T25FW)<sup>58</sup> and walking distance as assessed by the 2-Minute Walk Test (2MWT).<sup>59</sup>

233 <sup>60</sup> For the T25FW, patients will be asked to walk a marked distance of 25 feet (7.62  
234 metres) as quickly as possible, though safely, with an assistive device as required.<sup>61</sup>  
235 Scoring is achieved by taking the average of two trials. Excellent psychometric  
236 properties of the T25FW have been demonstrated.<sup>62 63</sup> A 20% change in the T25FW  
237 is interpreted as a clinically significant difference in walking speed.<sup>64</sup>

238 The 2MWT will be performed as outlined in the American Thoracic Society Guidelines,  
239 which were developed for the 6-Minute Walking Test<sup>65</sup> and adapted by international  
240 experts from the NIH Toolbox.<sup>66</sup> For the 2MWT, excellent validity<sup>67 59</sup> and test-retest  
241 reliability have been found.<sup>68</sup> A 20% change represents a clinically significant  
242 difference in walking distance.<sup>69</sup>

## 243 **Secondary outcomes**

244 Brain activation patterns

245 MRI data will be acquired at T<sub>1</sub> and T<sub>2</sub> on a 3 Tesla scanner (Siemens PRISMA,  
246 Siemens Healthcare Erlangen) using a 20-channel head coil. The MRI protocol  
247 includes a high-resolution structural three-dimensional (3D) T1-weighted MPRAGE  
248 sequence with 1 mm isotropic resolution (repetition time (TR) = 1900 ms, echo time  
249 (TE) = 2.7 ms) and a T2-weighted sequence (1mm isotropic, TR = 2800 ms, TE =  
250 405 ms). A 3D fluid-attenuated inversion recovery (FLAIR) sequence (1 mm isotropic,  
251 TR = 5000 ms, TE = 393 ms) is administered to assess hyperintense T2-lesion load  
252 in patients. Additionally, diffusion tensor imaging (DTI; 1.5 mm isotropic, TR = 3318  
253 ms, 64 directions), task-related fMRI (2 mm isotropic; TR = 2500 ms; TE = 30; 198  
254 volumes, field of view = 192 × 192 mm<sup>2</sup>, acquisition time = 8.31 minutes) and resting-  
255 state fMRI (rsfMRI; 2 mm isotropic; TR = 1000 ms; TE = 35; field of view = 256 × 256

256 mm<sup>2</sup>, acquisition time = 5.20 minutes) will be performed. The scans will take  
257 approximately 35 minutes in total.

### 258 Task-related fMRI: experimental stimuli and procedure

259 The block-fMRI task will comprise a music-cued bipedal ankle movement on a  
260 treadmill i.e., alternating dorsi- and plantarflexion of both feet <sup>70</sup>, a corresponding  
261 music-cued MI, and a listen-to-music-only condition. Four instrumental music-  
262 excerpts were selected as cues based on the same criteria used in the interventions.<sup>6</sup>  
263 Pace is held constant at 110 BPM for all cues. Each condition is repeated four times,  
264 and presented in a pseudo-randomised order, so that no condition or music-cue  
265 occurs twice in a row, and identical music-cues never run successively.  
266 Before each condition, a coloured symbol cue appears in the centre of the screen for  
267 2.5 seconds, indicating the subsequent condition (orange feet for movement, blue  
268 think bubble for MI, violet ear for music-only condition; Figure 3a). At the start of each  
269 condition, a fixation cross in the corresponding colour appears and the music starts.  
270 Participants are instructed to perform the ankle movement at the pace of the music,  
271 starting with the right foot, and concentrate on the music beat during the music-only  
272 condition. After 22.5 seconds, the fixation cross turns black, indicating a period of  
273 total rest for 15 seconds (Figure 3b).

274 *Figure 3 around here*

### 275 **Figure 3** Schematic representation of the block fMRI-paradigm

276 Figure legend: a) Presentation of each condition (music-cued movement, music-cued  
277 motor imagery, music-only), the corresponding symbol cues and the treadmill used  
278 for the study. b) Timeline of the paradigm.

279 Prior to entering the scanner, participants will practice the paradigm. Throughout the  
280 whole paradigm, participants are instructed to fixate on the cross, not to move their  
281 heads, to relax their entire body, except their feet during the movement condition. To

1  
2  
3 282 decrease stimulus-correlated motion, participants' heads are fixed with foam-  
4  
5 283 cushions and their knees flexed to approximately 135° using a soft roll and cushion  
6  
7 284 beneath their knees (Figure 3a).<sup>70</sup> Vision is corrected with prism lenses if necessary.  
8  
9  
10 285 During the paradigm, participants are observed with correct and incorrect movements  
11  
12 286 recorded. After the scan, participants are asked to complete a short questionnaire on  
13  
14 287 whether they recognised the songs (yes/no), liked the music-cues and found them  
15  
16 288 motivating to move (both items: 7-point Likert scales). Three items will ask about the  
17  
18 289 MI conditions (7-point Likert scale): the perceived MI difficulty and the extent to which  
19  
20 290 they have "seen" or "felt" the MI (similar to the KVIQ-10 response format).  
21  
22

### 23 291 Fatigue

24  
25  
26 292 The Neurological Fatigue Scale - Multiple Sclerosis (NFI-MS) will be used to assess  
27  
28 293 fatigue, including subscales of physical and cognitive fatigue, relief through daytime  
29  
30 294 sleep or rest and abnormal nighttime sleep and sleepiness.<sup>71 72</sup> A summary score of  
31  
32 295 items 1-7, 9 and 11-12 is generated. A 4-point Likert scale is used, from 0 = 'strongly  
33  
34 296 disagree' to 3 = 'strongly agree', where higher scores represent more severe fatigue.  
35  
36  
37 297 The NFI-MS displayed good validity<sup>72</sup> and reliability.<sup>72</sup>  
38  
39

### 40 298 Health-related quality of life

41  
42 299 The 31-item Multiple Sclerosis International Quality of Life questionnaire (MusiQoL)<sup>73</sup>  
43  
44 300 <sup>74</sup> has been chosen to record patient-reported health-related QoL (HRQoL). Nine  
45  
46 301 dimensions of HRQoL are assessed: everyday activities, psychological wellbeing,  
47  
48 302 symptoms, relationships with friends, family and the health care system, emotional  
49  
50 303 and sex life, coping and rejection. A 5-point Likert scale from 1 = 'never/not at all' to 5  
51  
52 304 = 'always/a lot' is used with reverse scoring of negatively worded items. Nine domain  
53  
54 305 scores and the global index are standardised on a 0-100 scale, where 100  
55  
56 306 represents the best HRQoL. A good validity <sup>75</sup> and reliability have been shown for the  
57  
58  
59 307 MusiQoL.<sup>73 74</sup>  
60

1  
2  
3 308 MI ability  
4

5 309 MI ability should be assessed using at least two different approaches,<sup>76</sup> hence the  
6  
7 310 Kinaesthetic and Visual Imagery questionnaire,<sup>77 78</sup> utilising a German short version  
8  
9 311 (KVIQ-G-10)<sup>77</sup> and a mental chronometry (MC) test.<sup>79-81</sup>  
10  
11

12 312 The KVIQ-(G)10 is patient-reported and assessor-administered and measures visual  
13  
14 313 and kinaesthetic MI ability in neurological patients using five items.<sup>78</sup> Scoring is  
15  
16 314 achieved using a 5-point Likert scale from 1 = 'no image' to 5 = 'image as clear as  
17  
18 315 seeing' (visual subscale) and from 1 = 'no sensation' to 5 = 'as intense as executing  
19  
20 316 the action' (kinaesthetic subscale). The KVIQ-G-10 has excellent psychometric  
21  
22 317 properties.<sup>77</sup>  
23  
24

25  
26 318 MC tests are based on the theory of functional equivalence between MI and actual  
27  
28 319 movement.<sup>55 82 83</sup> Excellent temporal equivalence has been found for corresponding  
29  
30 320 imagined and real movements.<sup>81 84</sup> MC evaluation will be at a comfortable tempo on a  
31  
32 321 marked 6-metre path.<sup>79-81</sup> The "index of deviation from isochrony" will be calculated to  
33  
34 322 quantify the discrepancy between imagined and real walking: deviation index =  
35  
36 323 absolute value (1-(MI/motor execution)).<sup>85</sup> Values close to zero are indicative of high  
37  
38 324 MI ability.<sup>85</sup>  
39  
40

41  
42 325 Depression, anxiety, and suicidality  
43

44 326 The German version<sup>86</sup> of the Hospital Anxiety and Depression Scale (HADS)<sup>45</sup> and  
45  
46 327 narrative screening for suicidality<sup>44</sup> adapted from item 9 of the Beck Depression  
47  
48 328 Inventory<sup>87</sup> and a suicidality screening checklist<sup>88</sup> will be employed for screening. The  
49  
50 329 14-item HADS assesses patient-reported anxiety and depression during the previous  
51  
52 330 two weeks. Anxiety or depression will be signified by a HADS anxiety<sup>42</sup> or depression  
53  
54 331 subscale score of 11/21 points<sup>43</sup> or suicidality as evaluated by a narrative screening  
55  
56 332 44. Good validity, reliability<sup>89</sup> and a bifactorial structure has been shown for the  
57  
58  
59  
60 333 German HADS.<sup>86</sup>



1  
2  
3 334 Overall cognitive impairment  
4

5 335 Overall cognitive impairment (attention and concentration, executive functions,  
6  
7 336 memory, language, visuo-constructive abilities, conceptual thinking, arithmetic and  
8  
9 337 orientation) will be assessed using the German Montreal Cognitive Assessment  
10  
11 338 (MoCA).<sup>46 90</sup> The highest possible score is 30 points; values  $\geq 26$  are considered  
12  
13 339 normal,<sup>41</sup> with good psychometric properties demonstrated.<sup>41 91 92</sup>  
14

15  
16 340 Motivational qualities of music in exercise settings  
17

18  
19 341 The 6-item Brunel Music Rating Inventory-2 (BMRI-2)<sup>93</sup> has been chosen to assess  
20  
21 342 the music-induced motivation to move on a 7-point Likert scale. Music pieces selected  
22  
23 343 from the audio-mix will be played to participants (in relevant 90-second excerpts).<sup>93</sup>  
24

25  
26 344 Motivational properties of the musical rhythm, style, melody, tempo, instrumentation  
27  
28 345 and beat during physical exercise will be patient-rated. The BMRI-2 has shown good  
29  
30 346 validity and reliability.<sup>93 94</sup>  
31

32  
33 347 Music-induced pleasure and arousal  
34

35 348 The Self-Assessment Manikin (SAM) will be used to measure the emotional  
36  
37 349 responses of pleasure and arousal to the music selected for the study intervention.<sup>95</sup>  
38

39  
40 350 <sup>96</sup> The SAM consists of two series of pictograms, each of which displays a dimension  
41  
42 351 on a 9-point scale<sup>95 96</sup>. SAM validations have demonstrated good to excellent  
43  
44 352 validity<sup>96 97</sup> and reliability<sup>98</sup>.  
45

46  
47 353 Self-efficacy  
48

49 354 The validated German version<sup>99</sup> of the Unidimensional Self-Efficacy Scale for MS  
50  
51 355 (USE-MS)<sup>100</sup> will be used to assess self-efficacy. For this patient-reported 12-item  
52  
53 356 questionnaire using a 4-point Likert scale, excellent psychometric properties have  
54  
55 357 been seen.<sup>99 100</sup>  
56  
57  
58  
59  
60

1  
2  
3 358 Cognitive function  
4  
5 359 Cognitive function including attention, visual scanning, working memory and  
6  
7 360 psychomotor speed will be measured using the Symbol Digit Modalities Test  
8  
9 361 (SDMT)<sup>101</sup>. Patients will be asked to assign the numbers 1 through 9 to nine different  
10  
11 362 symbols within 90 seconds. The number of maximum possible substitutions is 110.  
12  
13 363 Excellent construct,<sup>102</sup> predictive<sup>103</sup> and discriminatory validity<sup>104</sup> and test-retest  
14  
15 364 reliability<sup>105</sup> for the SDMT is demonstrated in pwMS.  
16  
17 365 Falls, adherence, and acceptability of the intervention  
18  
19 366 Falls and adverse events will be recorded in structured logs, the relationship with the  
20  
21 367 intervention evaluated and treatment provided if necessary, which is covered by an  
22  
23 368 indemnity insurance policy. Semi-structured telephone interviews will gain information  
24  
25 369 on adherence and acceptability. Adherence will be monitored using a self-report  
26  
27 370 checklist (Figure 2).

### 371 **Data management**

372 As for confidentiality, the Austrian, Tyrolean and Styrian Data Protection Acts will be  
373 adhered to, and personal data codified by a participant ID. Only the research team will  
374 have access to the data. Data will be only used for the purposes for which they were  
375 collected and saved on a password-protected computer. Data will be digitised in double  
376 entry with double coding of interview data performed. Quality assurance measures  
377 such as spot checks of value ranges and field types and logical checks will be  
378 performed.

### 379 **Data analyses**

#### 380 Statistical data analyses

381 All statistical analyses employ IBM SPSS software, release 27.0 (IBM Corporation,  
382 Armonk, NY, USA) and GraphPad Prism 9, San Diego, California. A two-tailed p-value  
383 <0.05 will signify statistical significance. Using Little's test of missing completely at random

1  
2  
3 384 (MCAR) the assumption of missing completely at random will be tested, signified by a p-value  
4  
5 385  $>0.05$ .<sup>106</sup> With data missing (completely) at random, multiple imputation will be used for handling  
6  
7 386 missing data, or other strategies as appropriate.<sup>107</sup> Including all cases as originally allocated,  
8  
9 387 intention-to-treat analysis will be performed. Descriptive statistics will be used as  
10  
11 388 appropriate and continuous data tested for normal distribution using the Shapiro Wilk test,  
12  
13  
14 389 Q-Q-plots and histograms. For between-group comparisons at baseline, One-Way  
15  
16 390 Analysis of Variance (ANOVA), Kruskal Wallis and Chi square tests will be used.  
17  
18  
19 391 Mixed Design ANOVA test assumptions will be tested for e.g., sphericity (Mauchly's  
20  
21 392 test) and homogeneity of variance (Levene's test), and standard correction  
22  
23  
24 393 procedures applied where appropriate. For continuous variables (T25FW, 2MWT, MC  
25  
26 394 and SDMT), a 2-Way Mixed Design ANOVA will be conducted, using time as within-  
27  
28 395 subject factor and group as between-subject factor, and the three DMT categories as  
29  
30 396 covariates (no DMT; moderately effective DMT; highly effective DMT).<sup>108</sup> Post-hoc  
31  
32 397 Bonferroni adjustment performed as appropriate. For categorical data (NFI-MS,  
33  
34 398 MusiQoL, KVIQ-10, HADS, MoCA, BMRI-2, SAM, and USE-MS), calculation of  
35  
36 399 differences between post-intervention and baseline values will be followed by Kruskal  
37  
38 400 Wallis and Dunn's multiple comparisons tests.

#### 401 Structural MRI analyses

402 Using the Statistical Parametric Mapping - Lesion segmentation toolbox, T2-lesion  
403 load (T2-LL) will be assessed on T2-FLAIR images by the lesion prediction  
404 algorithm<sup>109</sup> controlled by a single experienced rater. Individual binarised T2-LL  
405 masks will be registered to MNI and lesion probability mapping performed to identify  
406 the lesion locations, using FSL randomise. After lesion filling with the FSL lesion  
407 filling toolbox, brain volumes will be assessed from T1-weighted MPRAGE images  
408 using SIENAX.

#### 409 Functional MRI analyses

1  
2  
3 410 Individual resting state and task-fMRI data will be pre-processed using FEAT  
4  
5 411 (FMRIB's Expert Analysis Tool, v 6.0, part of FSL v 6.0.<sup>110</sup> Pre-processing includes:  
6  
7 412 motion correction using MCFLIRT, brain extraction, spatial smoothing using a  
8  
9 413 Gaussian kernel of FWHM (full width at half maximum) of 5 mm,<sup>111</sup> high pass  
10  
11 414 temporal filtering using a cut-off of 150 s (0.007 Hz), linear registration to main  
12  
13 415 structural image (BBR) and nonlinear registration warp resolution of 10 mm. High-  
14  
15 416 resolution T1 scans are used for image registration.

16  
17 417 First-level task fMRI analyses will be performed for each participant, assessing  
18  
19 418 activation patterns of the three conditions (movement, MI, music-only) and related  
20  
21 419 contrasts. Higher-level analyses will be used to examine potential differences  
22  
23 420 between intervention groups. Independent Component Analysis (ICA) will be  
24  
25 421 performed for rs-fMRI data (FSL-MELODIC, v 3.12). The resulting denoised  
26  
27 422 functional images will be resampled to standard space (MNI152 template 2 mm).  
28  
29 423 Dual-regression analyses on the denoised, registered functional images of each  
30  
31 424 subject will be performed to obtain individual spatial maps of the resting-state  
32  
33 425 networks, focusing on the sensorimotor and salience network. Group functional  
34  
35 426 connectivity maps for timepoints 1 and 2 and longitudinal change will be computed  
36  
37 427 for each subject (using FSL Randomise).

#### 428 Qualitative data analysis

429 A thematic analysis, understood as a 'method for identifying, analysing, and reporting  
430 patterns or themes within data'<sup>112</sup> of the interview material will be performed.<sup>113 114</sup>  
431 Semantic and latent themes will be identified, summarised and interpreted,<sup>112</sup> with data  
432 coded, segmented and extracted. From this data, broader themes will be developed.  
433 Themes will be reviewed, refined and validated in an iterative and reflexive process,<sup>115</sup>  
434 data recoded as appropriate, and subthemes identified. Subthemes or categories will  
435 be judged by the criteria of internal homogeneity (meaningful coherence within a

1  
2  
3 436 category) and external heterogeneity (clear differences between categories).<sup>116</sup> The  
4  
5 437 consolidated criteria for reporting qualitative research (COREQ) will be followed to  
6  
7  
8 438 enhance rigour, credibility and reliability.<sup>117</sup>  
9

## 10 439 **DISCUSSION**

11  
12 440 This study will investigate the effects of three variants of home-based cued gait training  
13  
14 441 interventions on walking, fatigue, emotional and cognitive function, and brain  
15  
16 442 activation. Music will be included to both provide a temporal cueing to the real or  
17  
18 443 imagined walking and potentially induce pleasure in practitioners. Pleasurable,  
19  
20 444 motivating music is known to induce highly enjoyable emotions, motivation and  
21  
22 445 arousal.<sup>118</sup> Music-based interventions have been found to improve motor performance,  
23  
24 446 mood and cognition in healthy people and patients with neurological disorders  
25  
26 447 including MS.<sup>119 120</sup> This may be relevant because studies have further shown that  
27  
28 448 depression<sup>121</sup> and cognitive or higher levels of motor impairment<sup>122 123</sup> reduce the MI  
29  
30 449 ability in pwMS. Therefore, it seems relevant to include screening for anxiety,  
31  
32 450 depression, and cognitive impairment in the planned study. Moreover, other aspects,  
33  
34 451 such as music-induced motivation, pleasure or arousal have not been previously  
35  
36 452 measured in pwMS.  
37

38  
39  
40 453 Functional MRI is a state-of-the-art method for assessing potential underlying  
41  
42 454 mechanisms of motor impairment and rehabilitation. Despite the paucity of recent  
43  
44 455 literature, we expect a training-induced decrease of the widespread activation,  
45  
46 456 leading to a more focal activation of the primary sensorimotor network during the  
47  
48 457 motor tasks.<sup>1-3</sup> This would also be in line with previous research indicating a  
49  
50 458 rehabilitation-induced “normalization” in brain activation, i.e. activation patterns more  
51  
52 459 similar to those observed in healthy controls<sup>3</sup>. In accordance with previous studies,  
53  
54 460 we expect that pwMS recruit similar brain areas during MI and actual movement,  
55  
56 461 albeit sensorimotor regions might be activated to a lesser and premotor and parietal  
57  
58  
59  
60

1  
2  
3 462 regions recruited to a higher extent during MI.<sup>124 125</sup> Additionally, cued MI training  
4  
5 463 may lead to similar reorganisation patterns compared to training of the actual  
6  
7 464 movement.<sup>34</sup>  
8  
9

10 465 The absence of a physiotherapist during the homebased intervention could be a  
11  
12 466 potential limitation of this study. Using a thorough familiarisation to the music-  
13  
14 467 supported MI and gait training, as well as regular telephone support, this limitation  
15  
16 468 should be overcome. A further limitation could be a lack of motivation and adherence  
17  
18 469 in participants, which we aim to counterbalance using weekly support phone calls and  
19  
20 470 further support calls upon request. A potential limitation in achieving the study  
21  
22 471 objectives may be patients' hesitancy to undergo two extra MRI investigations at  
23  
24 472 Centre 3. Patients will be explained that they will be provided with the examination  
25  
26 473 results at their request, which their treating doctors may include in their consultation  
27  
28 474 and treatment planning.  
29  
30  
31

32  
33 475 Advantages of a home-based intervention are that pwMS can practise independently,  
34  
35 476 provided that specifically trained physiotherapists familiarise them with the programme  
36  
37 477 and guide their initial training phases. Depending on the results from this study, the  
38  
39 478 most effective music-cued gait intervention can easily be put into practice.  
40  
41

## 42 479 **DECLARATIONS**

### 43 480 **Ethics, licences and dissemination plan**

44  
45  
46 481 The study will be conducted in accordance with the principles of the Declaration of  
47  
48 482 Helsinki (1964; 2013) and ICH E6(R2) Guideline for Good Clinical Practice (2016). The  
49  
50 483 study protocol was approved by the Ethics Committees of the Medical Universities of  
51  
52 484 Innsbruck and Graz on the 22.12.2020 (references 1347/2020 and 33-056 ex 20/21).  
53  
54 485 A licence was obtained for using the MoCA, SDMT and MusiQoL from MoCA Test Inc.  
55  
56 486 (Greenfield Park, Quebec), Hogrefe Austria GmbH (Vienna, Austria) and Mapi  
57  
58  
59  
60

1  
2  
3 487 Research Trust (Lyon, France). Results will be disseminated to participants via letters  
4  
5 488 and to clinicians and researchers via conferences and peer-reviewed publications.  
6  
7

### 8 489 **Acknowledgements**

9  
10 490 The authors would like to thank patients in previous studies for their support and Prof.  
11  
12 491 Markus Reindl for helpful comments.  
13

### 14 492 **Author Contributions**

15  
16 493 BS devised and designed the study, qualitative methodology and overall data  
17  
18 494 analyses. FD, CB, CE and DP substantially contributed to the conception and design  
19  
20 495 of the study. BS, DP and BH drafted the manuscript. DP, BH, SR and GR devised the  
21  
22 496 MRI analyses. RE and HH provided substantial input on the study methodology. FD,  
23  
24 497 CE and CB are study managers at their centres. All authors critically revised and  
25  
26 498 approved the final manuscript.  
27  
28  
29

### 30 499 **Funding**

31  
32  
33 500 This is an academic study, which is conducted with the financial support of Celgene, a  
34  
35 501 company of Bristol Myers Squibb (NA-CL-MS-PI-13909). The people involved in  
36  
37 502 decision-making about this funding have no influence on the study planning, conduct  
38  
39 503 and publication.  
40

### 41 504 **Competing interests**

42  
43  
44 505 None declared.  
45

### 46 506 **Data sharing statement**

47  
48  
49 507 Data generated by this research that support any publications will be made available  
50  
51 508 upon reasonable request as soon as possible. It will be considered submitting these  
52  
53 509 data to the Open Science initiative once future analyses related to this data set are  
54  
55 510 completed. The informed consent form includes the consent to controlled data sharing.  
56  
57

### 58 511 **REFERENCES**

59  
60

1  
2  
3  
4  
5  
6  
7  
8  
9  
10  
11  
12  
13  
14  
15  
16  
17  
18  
19  
20  
21  
22  
23  
24  
25  
26  
27  
28  
29  
30  
31  
32  
33  
34  
35  
36  
37  
38  
39  
40  
41  
42  
43  
44  
45  
46  
47  
48  
49  
50  
51  
52  
53  
54  
55  
56  
57  
58  
59  
60  
567

1. Compston A, Confavreux C, Lassmann H, et al. *McAlpine's multiple sclerosis*. 4<sup>th</sup> ed ed. London: Elsevier 2006.
2. Induruwa I, Constantinescu CS, Gran B. Fatigue in multiple sclerosis -a brief review. *J Neurol Sci* 2012;323(1-2):9-15. doi: 10.1016/j.jns.2012.08.007
3. Krupp L. Fatigue is intrinsic to multiple sclerosis (MS) and is the most commonly reported symptom of the disease. *Multiple Sclerosis Journal* 2006;12(4):367-8.
4. Kamran F, Samaei A, Asghari N, et al. The associations between fatigue, disability, and mobility and the quality of life in patients with multiple sclerosis. *Middle East Journal of Rehabilitation and Health* 2016;3(1):e34037. doi: 10.17795/mejrh-34037
5. Guillot A, Di Rienzo F, Macintyre T, et al. Imagining is not doing but involves specific motor commands: a review of experimental data related to motor inhibition. *Frontiers in human neuroscience* 2012;6:247. doi: 10.3389/fnhum.2012.00247
6. Thaut MH. *Rhythm, music and the brain. Scientific foundations and clinical applications*. New York: Routledge 2007:272.
7. Thaut MH, Leins AK, Rice RR, et al. Rhythmic auditory stimulation improves gait more than NDT/Bobath training in near-ambulatory patients early poststroke: a single-blind, randomized trial. *Neurorehabil Neural Repair* 2007;21(5):455-9. doi: 10.1177/1545968307300523
8. Hove MJ, Suzuki K, Uchitomi H, et al. Interactive rhythmic auditory stimulation reinstates natural 1/f timing in gait of Parkinson's patients. *PloS one* 2012;7(3):e32600. doi: 10.1371/journal.pone.0032600
9. Wittwer JE, Webster KE, Hill K. Music and metronome cues produce different effects on gait spatiotemporal measures but not gait variability in healthy older adults. *Gait & posture* 2013;37(2):219-22. doi: 10.1016/j.gaitpost.2012.07.006
10. Cason N, Schon D. Rhythmic priming enhances the phonological processing of speech. *Neuropsychologia* 2012;50(11):2652-8. doi: 10.1016/j.neuropsychologia.2012.07.018
11. Hausen M, Torppa R, Salmela VR, et al. Music and speech prosody: a common rhythm. *Frontiers in psychology* 2013;4:566. doi: 10.3389/fpsyg.2013.00566
12. Baram Y. Virtual sensory feedback for gait improvement in neurological patients. *Frontiers in neurology* 2013;4:138. doi: 10.3389/fneur.2013.00138
13. Uchitomi H, Ota L, Ogawa K-I, et al. Interactive rhythmic cue facilitates gait relearning in patients with Parkinson's disease. *PloS one* 2013;8(9) doi: 10.1371/journal.pone.0072176.g001
14. Muto T, Herzberger B, Hermsdoerfer J, et al. Interactive cueing with Walk-Mate for hemiparetic stroke rehabilitation. *Journal of neuroengineering and rehabilitation* 2012;9:58. doi: 10.1186/1743-0003-9-58
15. Conklyn D, Stough D, Novak E, et al. A home-based walking program using rhythmic auditory stimulation improves gait performance in patients with multiple sclerosis: a pilot study. *Neurorehabil Neural Repair* 2010;24(9):835-42. doi: 10.1177/1545968310372139 [published Online First: 2010/07/21]
16. Shahraki M, Sohrabi M, Taheri Torbati HR, et al. Effect of rhythmic auditory stimulation on gait kinematic parameters of patients with multiple sclerosis. *Journal of medicine and life* 2017;10(1):33-37.
17. Janata P, Tomic ST, Haberman JM. Sensorimotor coupling in music and the psychology of the groove. *Journal of Experimental Psychology: General* 2012;141(1):54-75. doi: 10.1037/a0024208
18. Jeannerod M. Mental imagery in the motor context. *Neuropsychologia* 1995;33(11):1419-32.
19. Kosslyn SM, Ganis G, Thompson WL. Neural foundations of imagery. *Nature Reviews Neuroscience* 2001;2(9):635-42. doi: 10.1038/35090055
20. Munzert J, Lorey B, Zentgraf K. Cognitive motor processes: the role of motor imagery in the study of motor representations. *Brain research reviews* 2009;60(2):306-26. doi: 10.1016/j.brainresrev.2008.12.024
21. Schuster C, Hilfiker R, Amft O, et al. Best practice for motor imagery: a systematic literature review on motor imagery training elements in five different disciplines. *BMC Med* 2011;9:75. doi: 10.1186/1741-7015-9-75 [published Online First: 2011/06/21]



- 1  
2  
3 568 22. Jeannerod M. The cognitive neuroscience of action. Oxford: Blackwell 1997.
- 4 569 23. Callow N, Hardy L. The relationship between the use of kinaesthetic imagery and  
5 570 different visual imagery perspectives. *Journal of Sports Science* 2004;22(2):167-77.  
6 571 doi: 10.1080/02640410310001641449
- 7 572 24. Guillot A, Collet C, Dittmar A. Relationship between visual and kinesthetic imagery, field  
8 573 dependence-independence, and complex motor skills. *Journal of Psychophysiology*  
9 574 2004;18(4):190-8. doi: 10.1027/0269-8803.18.4.190
- 10 575 25. Mohammadzadeh M, Haghgoo HA, Biglarian A. Effects of Combined Mental and  
11 576 Physical Practices on Walking and Daily Living Activities in Individuals With Multiple  
12 577 Sclerosis. *Iranian-Rehabilitation-Journal* 2020;18(4):455-64. doi:  
13 578 10.32598/irj.18.4.1070.1
- 14 579 26. Kahraman T, Savci S, Ozdogar AT, et al. Physical, cognitive and psychosocial effects of  
15 580 telerehabilitation-based motor imagery training in people with multiple sclerosis: A  
16 581 randomized controlled pilot trial. *Journal of telemedicine and telecare* 2020;26(5):251-  
17 582 60. doi: 10.1177/1357633X18822355 [published Online First: 2019/02/13]
- 18 583 27. Seebacher B, Kuisma R, Glynn A, et al. The effect of rhythmic-cued motor imagery on  
19 584 walking, fatigue and quality of life in people with multiple sclerosis: A randomised  
20 585 controlled trial. *Mult Scler* 2017;23(2):286-96. doi: 10.1177/1352458516644058
- 21 586 28. Seebacher B, Kuisma R, Glynn A, et al. Effects and mechanisms of differently cued and  
22 587 non-cued motor imagery in people with multiple sclerosis: A randomised controlled  
23 588 trial. *Mult Scler* 2019;25(12):1593-604. doi: 10.1177/1352458518795332 [published  
24 589 Online First: 2018/08/15]
- 25 590 29. Tavazzi E, Bergsland N, Cattaneo D, et al. Effects of motor rehabilitation on mobility and  
26 591 brain plasticity in multiple sclerosis: a structural and functional MRI study. *Journal of*  
27 592 *neurology* 2018;265(6):1393-401. doi: 10.1007/s00415-018-8859-y
- 28 593 30. Hanson M, Concialdi M. Motor imagery in multiple sclerosis: exploring applications in  
29 594 therapeutic treatment. *J Neurophysiol* 2019;121(2):347-49. doi:  
30 595 10.1152/jn.00291.2018
- 31 596 31. Sandroff BM, Jones CD, Baird JF, et al. Systematic Review on Exercise Training as a  
32 597 Neuroplasticity-Inducing Behavior in Multiple Sclerosis. *Neurorehabil Neural Repair*  
33 598 2020;34(7):575-88. doi: 10.1177/1545968320921836 [published Online First:  
34 599 2020/05/27]
- 35 600 32. Bast T, Pezze M, McGarrity S. Cognitive deficits caused by prefrontal cortical and  
36 601 hippocampal neural disinhibition. *Br J Pharmacol* 2017;174(19):3211-25. doi:  
37 602 10.1111/bph.13850 [published Online First: 2017/05/10]
- 38 603 33. Prosperini L, Piattella MC, Gianni C, et al. Functional and structural brain plasticity  
39 604 enhanced by motor and cognitive rehabilitation in multiple sclerosis. *Neural plasticity*  
40 605 2015;2015:481574. doi: 10.1155/2015/481574
- 41 606 34. Vogt S, Rienzo FD, Collet C, et al. Multiple roles of motor imagery during action  
42 607 observation. *Frontiers in human neuroscience* 2013;7:807. doi:  
43 608 10.3389/fnhum.2013.00807
- 44 609 35. Schulz KF, Altman DG, Moher D, et al. CONSORT 2010 statement: updated guidelines  
45 610 for reporting parallel group randomised trials. *PLoS medicine* 2010;7(3):e1000251.  
46 611 doi: 10.1371/journal.pmed.1000251
- 47 612 36. Seebacher B, Kuisma R, Glynn A, et al. Rhythmic cued motor imagery and walking in  
48 613 people with multiple sclerosis: a randomised controlled feasibility study. *Pilot*  
49 614 *Feasibility Stud* 2015;1(25):25. doi: 10.1186/s40814-015-0021-3
- 50 615 37. Seebacher B, Kuisma R, Glynn A, et al. Exploring cued and non-cued motor imagery  
51 616 interventions in people with multiple sclerosis: a randomised feasibility trial and  
52 617 reliability study. *Arch Physiother* 2018;8(1):6. doi: 10.1186/s40945-018-0045-0  
53 618 [published Online First: 2018/03/07]
- 54 619 38. Thompson AJ, Banwell BL, Barkhof F, et al. Diagnosis of multiple sclerosis: 2017  
55 620 revisions of the McDonald criteria. *The Lancet Neurology* 2018;17(2):162-73. doi:  
56 621 10.1016/s1474-4422(17)30470-2
- 57  
58  
59  
60

1  
2  
3  
4  
5  
6  
7  
8  
9  
10  
11  
12  
13  
14  
15  
16  
17  
18  
19  
20  
21  
22  
23  
24  
25  
26  
27  
28  
29  
30  
31  
32  
33  
34  
35  
36  
37  
38  
39  
40  
41  
42  
43  
44  
45  
46  
47  
48  
49  
50  
51  
52  
53  
54  
55  
56  
57  
58  
59  
60

- 622 39. Polman CH, Reingold SC, Banwell B, et al. Diagnostic criteria for multiple sclerosis: 2010  
623 revisions to the McDonald criteria. *Ann Neurol* 2011;69(2):292-302. doi:  
624 10.1002/ana.22366 [published Online First: 2011/03/10]
- 625 40. Kurtzke JF. Rating neurologic impairment in multiple sclerosis: an Expanded Disability  
626 Status Scale (EDSS). *Neurology* 1983;33(11):1444-52. [published Online First:  
627 1983/11/01]
- 628 41. Freitas S, Batista S, Afonso AC, et al. The Montreal Cognitive Assessment (MoCA) as a  
629 screening test for cognitive dysfunction in multiple sclerosis. *Appl Neuropsychol Adult*  
630 2018;25(1):57-70. doi: 10.1080/23279095.2016.1243108
- 631 42. Litster B, Fiest KM, Patten SB, et al. Screening Tools for Anxiety in People with Multiple  
632 Sclerosis: A Systematic Review. *Int J MS Care* 2016;18(6):273-81. doi:  
633 10.7224/1537-2073.2016-004
- 634 43. Watson TM, Ford E, Worthington E, et al. Validation of Mood Measures for People with  
635 Multiple Sclerosis. *Int J MS Care* 2014;16:105-09.
- 636 44. Hanna J, Santo JB, Blair M, et al. Comparing depression screening tools in persons with  
637 multiple sclerosis (MS). *Rehabilitation psychology* 2017;62(1):20-24. doi:  
638 10.1037/rep0000115
- 639 45. Zigmond AS, Snaith RP. The hospital anxiety and depression scale. *Acta psychiatrica*  
640 *Scandinavica* 1983;67(6):361-70.
- 641 46. Nasreddine ZS, Phillips NA, Bedirian V, et al. The Montreal Cognitive Assessment,  
642 MoCA: a brief screening tool for mild cognitive impairment. *Journal of the American*  
643 *Geriatrics Society* 2005;53(4):695-9. doi: 10.1111/j.1532-5415.2005.53221.x
- 644 47. Baert I, Freeman J, Smedal T, et al. Responsiveness and clinically meaningful  
645 improvement, according to disability level, of five walking measures after rehabilitation  
646 in multiple sclerosis: a European multicenter study. *Neurorehabil Neural Repair*  
647 2014;28(7):621-31. doi: 10.1177/1545968314521010
- 648 48. Pau M, Casu G, Porta M, et al. Timed Up and Go in men and women with Multiple  
649 Sclerosis: Effect of muscular strength. *Journal of Bodywork and Movement Therapies*  
650 2020;24(4):124-30. doi: <https://doi.org/10.1016/j.jbmt.2020.06.014>
- 651 49. Røislien J, Skare Ø, Gustavsen M, et al. Simultaneous estimation of effects of gender,  
652 age and walking speed on kinematic gait data. *Gait & posture* 2009;30(4):441-5. doi:  
653 10.1016/j.gaitpost.2009.07.002 [published Online First: 2009/08/12]
- 654 50. Audacity®. Version 3.0.0. Audio editor and recorder: Audacity Team; 2012 [It is free  
655 software distributed under the terms of the GNU General Public License. The name  
656 Audacity® is a registered trademark.]. Available from: <http://audacityteam.org/>  
657 accessed 19.11. 2020.
- 658 51. Thaut CP, Rice RR. Rhythmic auditory stimulation (RAS). In: Thaut MH, Hoemberg V,  
659 eds. *Handbook of neurologic music therapy*. Oxford: Oxford University Press  
660 2014:94-105.
- 661 52. Karageorghis CI, Terry PC, Lane AM, et al. The BASES Expert Statement on use of  
662 music in exercise. *Journal of sports sciences* 2012;30(9):953-6. doi:  
663 10.1080/02640414.2012.676665
- 664 53. Edwards WH. *Motor learning and control: from theory to practice*. Belmont: Wadsworth  
665 2011.
- 666 54. Wondrusch C, Schuster-Amft C. A standardized motor imagery introduction program  
667 (MIIP) for neuro-rehabilitation: development and evaluation. *Frontiers in human*  
668 *neuroscience* 2013;7:477. doi: 10.3389/fnhum.2013.00477
- 669 55. Holmes PS, Collins DJ. The PETTLEP approach to motor imagery: A functional  
670 equivalence model for sport psychologists. *J Appl Sport Psychol* 2001;13(1):60-83.
- 671 56. Hoffmann TC, Glasziou PP, Boutron I, et al. Better reporting of interventions: template for  
672 intervention description and replication (TIDieR) checklist and guide. *Bmj*  
673 2014;348:g1687. doi: 10.1136/bmj.g1687
- 674 57. Wiendl H, Gold R, Berger T, et al. Multiple Sclerosis Therapy Consensus Group  
675 (MSTCG): position statement on disease-modifying therapies for multiple sclerosis  
676 (white paper). *Therapeutic advances in neurological disorders*

- 2021;14:17562864211039648. doi: 10.1177/17562864211039648 [published Online First: 2021/08/24]
58. Kaufman M, Moyer D, Norton J. The significant change for the Timed 25-foot Walk in the Multiple Sclerosis Functional Composite. *Mult Scler* 2000;6(4):286-90. [published Online First: 2000/08/30]
59. Gijbels D, Eijnde BO, Feys P. Comparison of the 2- and 6-minute walk test in multiple sclerosis. *Mult Scler* 2011;17(10):1269-72. doi: 10.1177/1352458511408475 [published Online First: 2011/06/07]
60. Butland RJ, Pang J, Gross ER, et al. Two-, six-, and 12-minute walking tests in respiratory disease. *Br Med J (Clin Res Ed)* 1982;284(6329):1607-8.
61. Cutter GR, Baier ML, Rudick RA, et al. Development of a multiple sclerosis functional composite as a clinical trial outcome measure. *Brain : a journal of neurology* 1999;122 ( Pt 5):871-82.
62. Nieuwenhuis MM, Van Tongeren H, Sorensen PS, et al. The six spot step test: a new measurement for walking ability in multiple sclerosis. *Multiple Sclerosis Journal* 2006;12(4):495-500. [published Online First: 2006/08/12]
63. Bosma LV, Sonder JM, Kragt JJ, et al. Detecting clinically-relevant changes in progressive multiple sclerosis. *Multiple Sclerosis Journal* 2015;21(2):171-9. doi: 10.1177/1352458514540969
64. Hobart J, Blight AR, Goodman A, et al. Timed 25-foot walk: direct evidence that improving 20% or greater is clinically meaningful in MS. *Neurology* 2013;80(16):1509-17. doi: 10.1212/WNL.0b013e31828cf7f3
65. A. T. S. Committee on Proficiency Standards for Clinical Pulmonary Function Laboratories. ATS statement: guidelines for the six-minute walk test. *American Journal of Respiratory and Critical Care Medicine* 2002;166(1):111-7. doi: 10.1164/ajrccm.166.1.at1102
66. Gershon RC, Wagster MV, Hendrie HC, et al. NIH toolbox for assessment of neurological and behavioral function. *Neurology* 2013;80(11 Suppl 3):S2-6. doi: 10.1212/WNL.0b013e3182872e5f [published Online First: 2013/03/27]
67. Gijbels D, Dalgas U, Romberg A, et al. Which walking capacity tests to use in multiple sclerosis? A multicentre study providing the basis for a core set. *Multiple Sclerosis Journal* 2012;18(3):364-71. doi: 10.1177/1352458511420598 [published Online First: 2011/09/29]
68. Valet M, Lejeune T, Devis M, et al. Timed Up-and-Go and 2-Minute Walk Test in patients with multiple sclerosis with mild disability: reliability, responsiveness and link with perceived fatigue. *European journal of physical and rehabilitation medicine* 2019;55(4):450-55. doi: 10.23736/s1973-9087.18.05366-2 [published Online First: 2018/10/13]
69. Learmonth YC, Dlugonski DD, Pilutti LA, et al. The reliability, precision and clinically meaningful change of walking assessments in multiple sclerosis. *Mult Scler* 2013;19(13):1784-91. doi: 10.1177/1352458513483890
70. Enzinger C, Johansen-Berg H, Dawes H, et al. Functional MRI correlates of lower limb function in stroke victims with gait impairment. *Stroke; a journal of cerebral circulation* 2008;39(5):1507-13. doi: 10.1161/strokeaha.107.501999 [published Online First: 2008/03/15]
71. NFI-MS Neurologischer Fragebogen zur Müdigkeit. *NFI-MS Austria/German - Version of 30 Sep 13 - Mapi ID7555 / NFI-MS\_AU10\_deu-ATdoc* 2010.
72. Mills RJ, Young CA, Pallant JF, et al. Development of a patient reported outcome scale for fatigue in multiple sclerosis: The Neurological Fatigue Index (NFI-MS). *Health and quality of life outcomes* 2010;8:22. doi: 10.1186/1477-7525-8-22
73. Simeoni M, Auquier P, Fernandez O, et al. Validation of the Multiple Sclerosis International Quality of Life questionnaire. *Mult Scler* 2008;14(2):219-30. doi: 10.1177/1352458507080733
74. Flachenecker P, Vogel U, Simeoni MC, et al. [MusIQoL: international questionnaire investigating quality of life in multiple sclerosis: validation results for the German

1  
2  
3  
4  
5  
6  
7  
8  
9  
10  
11  
12  
13  
14  
15  
16  
17  
18  
19  
20  
21  
22  
23  
24  
25  
26  
27  
28  
29  
30  
31  
32  
33  
34  
35  
36  
37  
38  
39  
40  
41  
42  
43  
44  
45  
46  
47  
48  
49  
50  
51  
52  
53  
54  
55  
56  
57  
58  
59  
60  
787

- subpopulation in an international comparison]. *Der Nervenarzt* 2011;82(10):1281-9. doi: 10.1007/s00115-011-3276-9
75. Moore F, Vickrey B, Fortin K, et al. Two Multiple Sclerosis Quality-of-Life Measures: Comparison in a National Sample. *Canadian Journal of Neurological Sciences / Journal Canadien des Sciences Neurologiques* 2015;42(1):55-63. doi: 10.1017/cjn.2014.128 [published Online First: 2015/01/14]
76. Guillot A, Collet C. *The neurophysiological foundations of mental and motor imagery*. New York: Oxford University Press 2010.
77. Schuster C, Lussi A, Wirth B, et al. Two assessments to evaluate imagery ability: translation, test-retest reliability and concurrent validity of the German KVIQ and Imaprax. *BMC medical research methodology* 2012;12(1):127. doi: 10.1186/1471-2288-12-127
78. Malouin F, Richards CL, Jackson PL, et al. The Kinesthetic and Visual Imagery Questionnaire (KVIQ) for assessing motor imagery in persons with physical disabilities: a reliability and construct validity study. *Journal of neurologic physical therapy : JNPT* 2007;31(1):20-9. doi: 10.1097/01.npt.0000260567.24122.64
79. Collet C, Guillot A, Lebon F, et al. Measuring motor imagery using psychometric, behavioral, and psychophysiological tools. *Exercise and sport sciences reviews* 2011;39(2):85-92. doi: 10.1097/JES.0b013e31820ac5e0
80. Lee WH, Kim E, Seo HG, et al. Target-oriented motor imagery for grasping action: different characteristics of brain activation between kinesthetic and visual imagery. *Scientific reports* 2019;9(1):12770. doi: 10.1038/s41598-019-49254-2 [published Online First: 2019/09/06]
81. Papaxanthis C, Pozzo T, Skoura X, et al. Does order and timing in performance of imagined and actual movements affect the motor imagery process? The duration of walking and writing task. *Behavioural brain research* 2002;134(1-2):209-15.
82. Decety J, Grezes J. Neural mechanisms subserving the perception of human actions. *Trends in cognitive sciences* 1999;3(5):172-78.
83. Jeannerod M. The 25th Bartlett Lecture: To act or not to act: Perspectives on the representation of actions. *The Quarterly Journal of Experimental Psychology A: Human Experimental Psychology* 1999;52A(1):1-29. doi: 10.1080/027249899391205
84. Decety J, Jeannerod M, Prablanc C. The timing of mentally represented actions. *Behavioural brain research* 1989;34(1-2):35-42.
85. Marchesotti S, Bassolino M, Serino A, et al. Quantifying the role of motor imagery in brain-machine interfaces. *Scientific reports* 2016;6:24076. doi: 10.1038/srep24076 [published Online First: 2016/04/08]
86. Petermann F. Hospital Anxiety and Depression Scale, Deutsche Version (HADS-D). *Zeitschrift für Psychiatrie, Psychologie und Psychotherapie* 2011;59(3):251-53. doi: 10.1024/1661-4747/a000077
87. Beck AT, Ward CH, Mendelson M, et al. An inventory for measuring depression. *Archives of general psychiatry* 1961;4:561-71.
88. Kozel B. *Professionelle Pflege bei Suizidalität*. Köln: Psychiatrie Verlag 2015:141.
89. Herrmann C, Buss U, Snaith RP. *HADS-D: Ein Fragebogen zur Erfassung von Angst und Depressivität in der somatischen Medizin. Testdokumentation und Handanweisung*. Bern: Verlag Hans Huber 1995.
90. Bartusch S, Zipper S. Montreal Cognitive Assessment (MoCA), deutsche Übersetzung 2004 [Available from: [www.mocatest.org](http://www.mocatest.org) accessed 2 Jan, 2018].
91. Dagenais E, Rouleau I, Demers M, et al. Value of the MoCA test as a screening instrument in multiple sclerosis. *The Canadian journal of neurological sciences Le journal canadien des sciences neurologiques* 2013;40(3):410-5. doi: 10.1017/s0317167100014384 [published Online First: 2013/04/23]
92. Sala G, Inagaki H, Iishioka Y, et al. The psychometric properties of the Montreal Cognitive Assessment (MoCA): A comprehensive investigation. *Swiss Journal of Psychology* 2020;79(3-4):155-61. doi: 10.1024/1421-0185/a000242
93. Karageorghis CI, Priest DL, Terry PC, et al. Redesign and initial validation of an instrument to assess the motivational qualities of music in exercise: the Brunel Music

- 1  
2  
3 788 Rating Inventory-2. *Journal of sports sciences* 2006;24(8):899-909. doi:  
4 789 10.1080/02640410500298107
- 5 790 94. Clark IN, Baker FA, Peiris CL, et al. The Brunel Music Rating Inventory-2 is a reliable and  
6 791 valid instrument for older cardiac rehabilitation patients selecting music for exercise.  
7 792 *Psychology of Music* 2015;44(2):249-62. doi: 10.1177/0305735614565830
- 8 793 95. Lang PJ, Bradley MM, Cuthbert BN. International Affective Picture System (IAPS):  
9 794 Technical Manual and Affective Ratings. 1997.
- 10 795 96. Bradley MM, Lang PJ. Measuring emotion: the Self-Assessment Manikin and the  
11 796 Semantic Differential. *Journal of behavior therapy and experimental psychiatry*  
12 797 1994;25(1):49-59.
- 13 798 97. Geethanjali B, Adalarasu K, Hemapraba A, et al. Emotion analysis using SAM (Self-  
14 799 Assessment Manikin) scale. *Biomedical Research* 2017;S18-S24
- 15 800 98. Backs RW, da Silva SP, Han K. A comparison of younger and older adults' self-  
16 801 assessment manikin ratings of affective pictures. *Experimental aging research*  
17 802 2005;31(4):421-40. doi: 10.1080/03610730500206808
- 18 803 99. Seebacher B, Mills RJ, Reindl M, et al. German translation, cultural adaptation and  
19 804 validation of the unidimensional self-efficacy scale for multiple sclerosis. *BMC Neurol*  
20 805 2021;21(1):163. doi: 10.1186/s12883-021-02183-y [published Online First:  
21 806 2021/04/19]
- 22 807 100. Young CA, Mills RJ, Woolmore J, et al. The unidimensional self-efficacy scale for MS  
23 808 (USE-MS): developing a patient based and patient reported outcome. *Mult Scler*  
24 809 2012;18(9):1326-33. doi: 10.1177/1352458512436592
- 25 810 101. Smith A. Symbol Digit Modalities Test (SDMT). Manual (Revised). Los Angeles, CA:  
26 811 Western Psychological Services 1982.
- 27 812 102. Benedict RH, Cookfair D, Gavett R, et al. Validity of the minimal assessment of  
28 813 cognitive function in multiple sclerosis (MACFIMS). *Journal of the International*  
29 814 *Neuropsychological Society : JINS* 2006;12(4):549-58. doi:  
30 815 10.1017/s1355617706060723 [published Online First: 2006/09/20]
- 31 816 103. Amato MP, Portaccio E, Goretti B, et al. Relevance of cognitive deterioration in early  
32 817 relapsing-remitting MS: a 3-year follow-up study. *Mult Scler* 2010;16(12):1474-82. doi:  
33 818 10.1177/1352458510380089 [published Online First: 2010/08/24]
- 34 819 104. Benedict RH, DeLuca J, Phillips G, et al. Validity of the Symbol Digit Modalities Test as  
35 820 a cognition performance outcome measure for multiple sclerosis. *Mult Scler*  
36 821 2017;23(5):721-33. doi: 10.1177/1352458517690821 [published Online First:  
37 822 2017/02/17]
- 38 823 105. Benedict RH. Effects of using same- versus alternate-form memory tests during short-  
39 824 interval repeated assessments in multiple sclerosis. *Journal of the International*  
40 825 *Neuropsychological Society : JINS* 2005;11(6):727-36. doi:  
41 826 10.1017/s1355617705050782 [published Online First: 2005/10/27]
- 42 827 106. Little RJA. A Test of Missing Completely at Random for Multivariate Data with Missing  
43 828 Values. *Journal of the American Statistical Association* 1988;83(404):1198-202. doi:  
44 829 10.1080/01621459.1988.10478722
- 45 830 107. Jakobsen JC, Gluud C, Wetterslev J, et al. When and how should multiple imputation be  
46 831 used for handling missing data in randomised clinical trials - a practical guide with  
47 832 flowcharts. *BMC medical research methodology* 2017;17(1):162. doi:  
48 833 10.1186/s12874-017-0442-1 [published Online First: 2017/12/07]
- 49 834 108. Wiendl H, Gold R, Berger T, et al. Multiple sclerosis treatment consensus group  
50 835 (MSTCG): position paper on disease-modifying treatment of multiple sclerosis 2021  
51 836 (white paper). *Der Nervenarzt* 2021;92(8):773-801. doi: 10.1007/s00115-021-01157-2  
52 837 [published Online First: 2021/07/23]
- 53 838 109. Schmidt P, Pongratz V, Küster P, et al. Automated segmentation of changes in FLAIR-  
54 839 hyperintense white matter lesions in multiple sclerosis on serial magnetic resonance  
55 840 imaging. *NeuroImage: Clinical* 2019;23:101849. doi:  
56 841 <https://doi.org/10.1016/j.nicl.2019.101849>
- 57 842 110. Jenkinson M, Beckmann CF, Behrens TEJ, et al. FSL. *NeuroImage* 2012;62(2):782-90.  
58 843 doi: <https://doi.org/10.1016/j.neuroimage.2011.09.015>

- 1  
2  
3 844 111. Poldrack RA, Mumford JA, Nichols TE. Handbook of Functional MRI Data Analysis.  
4 845 Cambridge: Cambridge University Press 2011.
- 5 846 112. Braun V, Clarke V. Using thematic analysis in psychology. *Qualitative Research in*  
6 847 *Psychology* 2006;3(2):77-101. doi: 10.1191/1478088706qp063oa
- 7 848 113. Bree RT, Gallagher T. Using Microsoft Excel to code and thematically analyse  
8 849 qualitative data: a simple, cost-effective approach. *All Ireland Journal of Teaching and*  
9 850 *Learning in Higher Education (AISHE-J)* 20216;8(2):2811-19.
- 10 851 114. Bree RT, Dunne K, Brereton B, et al. Engaging learning and addressing over-  
11 852 assessment in the Science laboratory: solving a pervasive problem. *The All Ireland*  
12 853 *Journal of Teaching and Learning in Higher Education (AISHE-J)* 2014;6(3):206.1-  
13 854 06.36.
- 14 855 115. Srivastava P, Hopwood N. A Practical Iterative Framework for Qualitative Data Analysis.  
15 856 *International Journal of Qualitative Methods* 2009;8(1):76-84. doi:  
16 857 10.1177/160940690900800107
- 17 858 116. Patton MQ. Qualitative evaluation and research methods, 2nd ed. Thousand Oaks, CA,  
18 859 US: Sage Publications, Inc 1990.
- 19 860 117. Tong A, Sainsbury P, Craig J. Consolidated criteria for reporting qualitative research  
20 861 (COREQ): a 32-item checklist for interviews and focus groups. *International journal*  
21 862 *for quality in health care : journal of the International Society for Quality in Health*  
22 863 *Care / ISQua* 2007;19(6):349-57. doi: 10.1093/intqhc/mzm042
- 23 864 118. Witek MA, Clarke EF, Wallentin M, et al. Syncopation, body-movement and pleasure in  
24 865 groove music. *PloS one* 2014;9(4):e94446. doi: 10.1371/journal.pone.0094446
- 25 866 119. Sihvonen AJ, Sarkamo T, Leo V, et al. Music-based interventions in neurological  
26 867 rehabilitation. *Lancet Neurol* 2017;16(8):648-60. doi: 10.1016/S1474-4422(17)30168-  
27 868 0 [published Online First: 2017/07/01]
- 28 869 120. Karageorghis CI, Terry PC. The psychological, psychophysical, and ergogenic effects of  
29 870 music in sport: a review and synthesis. In: Bateman AJ, Bale JR, eds. *Sporting*  
30 871 *sounds: relationships between sport and music*. London: Routledge 2009:13-36.
- 31 872 121. Tabrizi YM, Mazhari S, Nazari MA, et al. Abnormalities of motor imagery and  
32 873 relationship with depressive symptoms in mildly disabling relapsing-remitting multiple  
33 874 sclerosis. *Journal of neurologic physical therapy : JNPT* 2014;38(2):111-8. doi:  
34 875 10.1097/NPT.0000000000000033
- 35 876 122. Tacchino A, Bove M, Pedulla L, et al. Imagined actions in multiple sclerosis patients:  
36 877 evidence of decline in motor cognitive prediction. *Exp Brain Res* 2013;229(4):561-70.  
37 878 doi: 10.1007/s00221-013-3617-y
- 38 879 123. Heremans E, D'Hooge A M, De Bondt S, et al. The relation between cognitive and  
39 880 motor dysfunction and motor imagery ability in patients with multiple sclerosis. *Mult*  
40 881 *Scier* 2012;18(9):1303-9. doi: 10.1177/1352458512437812 [published Online First:  
41 882 2012/03/02]
- 42 883 124. Hetu S, Gregoire M, Saimpont A, et al. The neural network of motor imagery: An ALE  
43 884 meta-analysis. *Neuroscience and biobehavioral reviews* 2013 doi:  
44 885 10.1016/j.neubiorev.2013.03.017
- 45 886 125. Hardwick RM, Caspers S, Eickhoff SB, et al. Neural Correlates of Motor Imagery, Action  
46 887 Observation, and Movement Execution: A Comparison Across Quantitative Meta-  
47 888 Analyses. *bioRxiv* 2017:198432. doi: 10.1101/198432

889

890

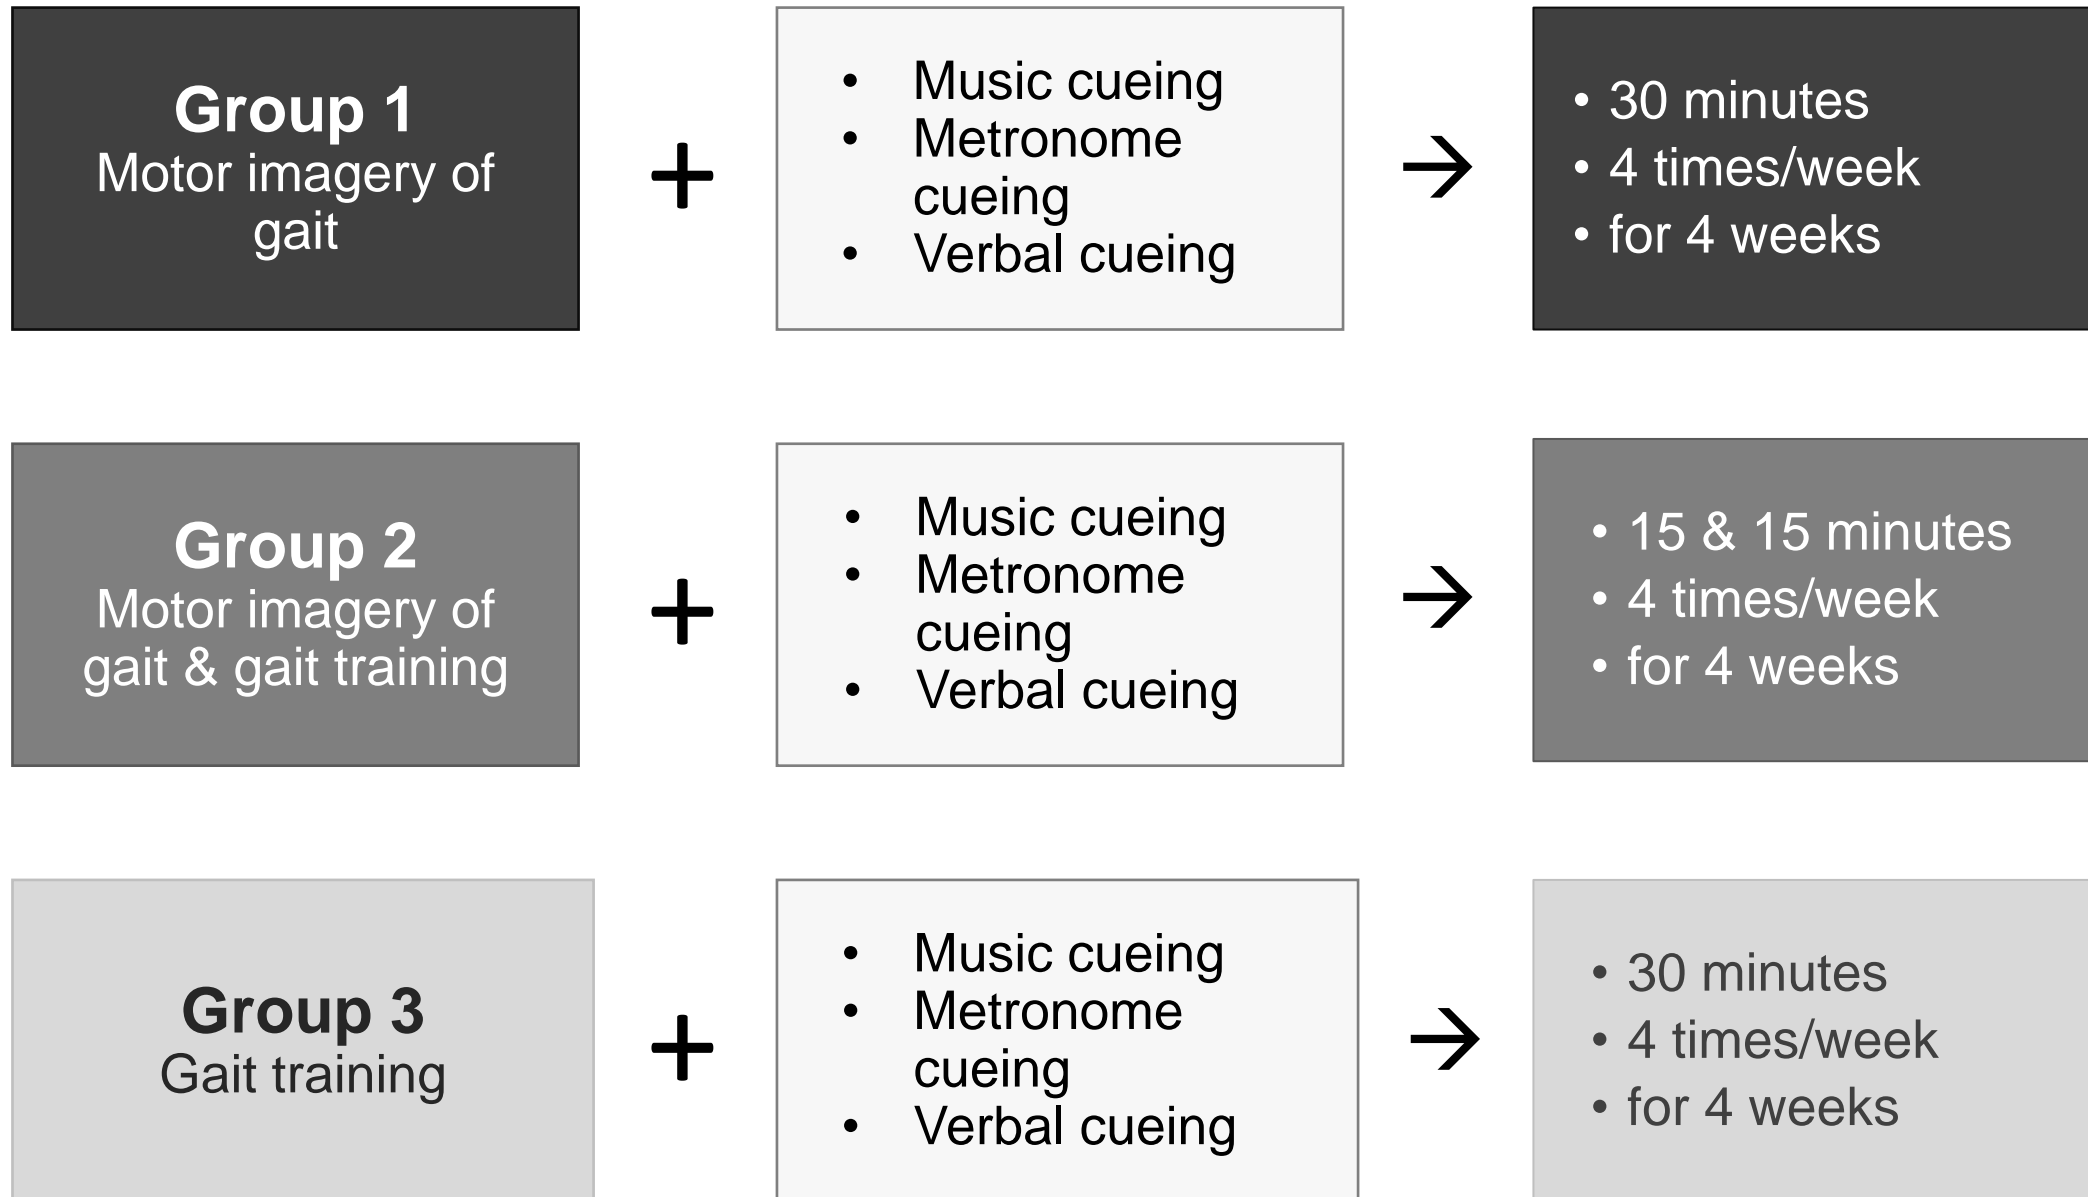1  
2  
3  
4  
5  
6  
7  
8  
9  
10  
11  
12  
13  
14  
15  
16  
17  
18  
19  
20  
21  
22  
23  
24  
25  
26  
27  
28  
29  
30  
31  
32  
33  
34  
35  
36  
37  
38  
39  
40  
41

# Weekly semi-structured phone interviews

# Follow-up semi-structured phone interviews

Semi-structured, open-ended questions aimed at gaining insight into patients' perspectives

Training duration

Training frequency

Management of training

Coping with training

Barriers to training

Facilitators for training

Training-related problems

Training-related support provided by interviewer

Documentation of training

Documentation of falls

Documentation-related challenges

General health status

Self-perceived walking as compared to before the study

Self-perceived fatigue as compared to before the study

Health status as compared to before the study

Recommendation of study participation to other people with multiple sclerosis (yes/no – reasons)

Suggestions for adaptations of the intervention in potential follow-up study (yes/no – what & why)

Any falls

Documentation of falls



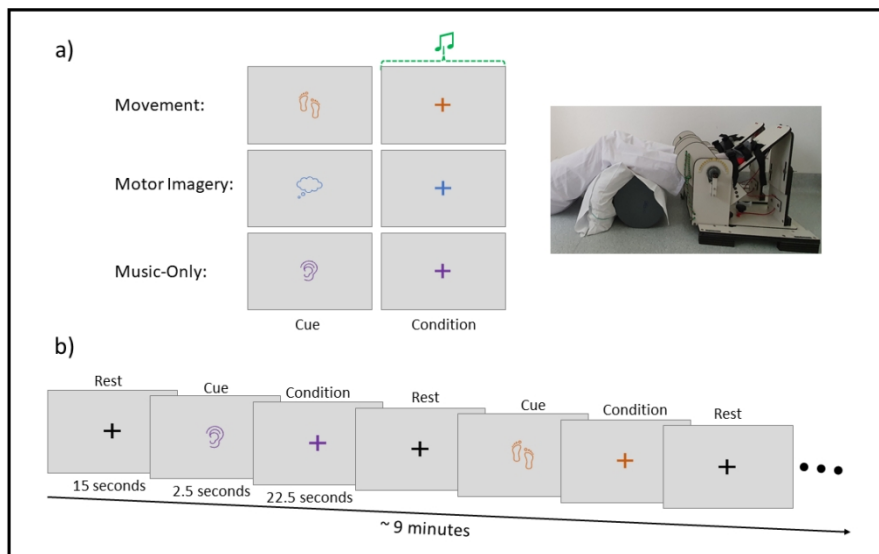

Figure 3

108x60mm (300 x 300 DPI)

**CONSORT Flow Diagram (Extension to randomised pilot and feasibility trials; Eldridge et al., 2016)**

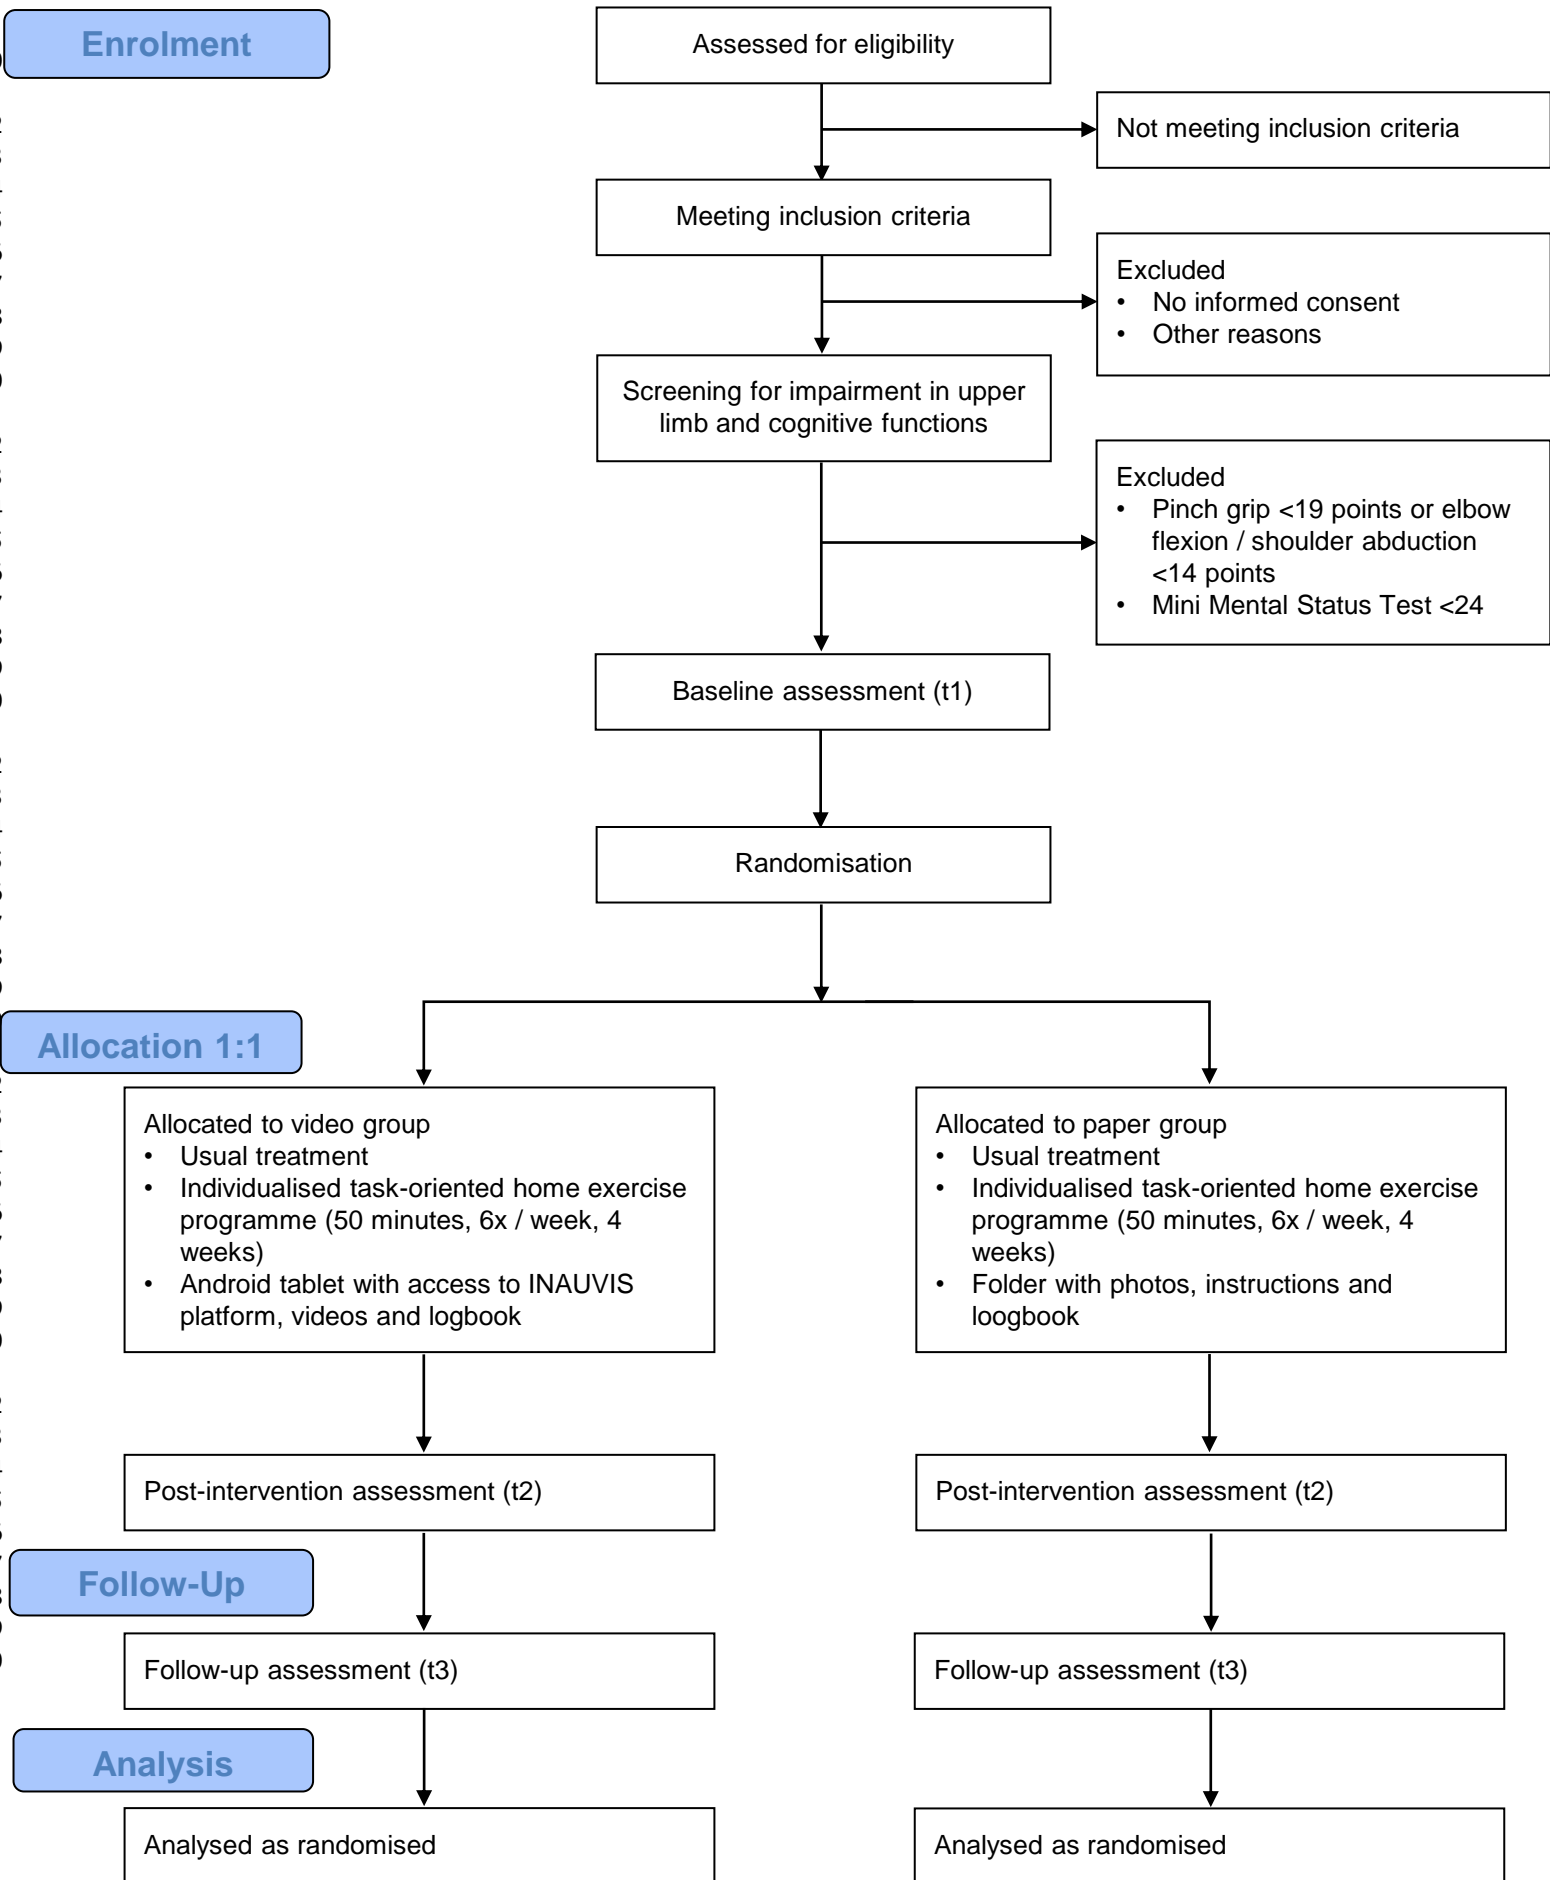

**Table 1** Intervention chart

| ITEM NO                 | ITEM DESCRIPTION                                                                                                                                                                                                                                                                               |                                                                   |                                                            |
|-------------------------|------------------------------------------------------------------------------------------------------------------------------------------------------------------------------------------------------------------------------------------------------------------------------------------------|-------------------------------------------------------------------|------------------------------------------------------------|
| <b>1 BRIEF NAME</b>     | <b>Group 1</b>                                                                                                                                                                                                                                                                                 | <b>Group 2</b>                                                    | <b>Group 3</b>                                             |
|                         | Motor imagery (MI) with music-,<br>metronome- and verbal cueing                                                                                                                                                                                                                                | MI and gait training with music-,<br>metronome- and verbal cueing | Gait training with music-,<br>metronome- and verbal cueing |
|                         | Music accentuated by metronome cues and intermittent concise verbal cueing                                                                                                                                                                                                                     |                                                                   |                                                            |
| <b>2 WHY</b>            | <ul style="list-style-type: none"> <li>- PETTLEP (Physical, Environment, Task, Timing, Learning, Emotion, Perspective) approach to MI (Holmes and Collins 2001)<sup>1</sup></li> <li>- Rhythmic-auditory stimulation (cueing) for gait training (Thaut 2007)<sup>2</sup></li> </ul>            |                                                                   |                                                            |
| <b>3 WHAT MATERIALS</b> | <ul style="list-style-type: none"> <li>- Dropbox link including the audio mix and download to smartphone, laptop, tablet or MP3-player, or study CDs in group 1</li> <li>- 4 sessions in each audiomix, one for each week</li> <li>- Headphones or earphones may be used if desired</li> </ul> |                                                                   |                                                            |
| <b>Audiomix Content</b> | - Kinaesthetic MI instructions                                                                                                                                                                                                                                                                 | - Kinaesthetic MI and gait training instructions                  | - Gait training instructions                               |

1  
2  
3  
4  
5  
6  
7  
8  
9  
10  
11  
12  
13  
14  
15  
16  
17  
18  
19  
20  
21  
22  
23  
24  
25  
26  
27  
28  
29  
30  
31  
32  
33  
34  
35  
36  
37  
38  
39  
40  
41  
42  
43  
44  
45  
46

|                          |                                                                                                                                                                                                                                                                                                                                                                                                                                            |                                                                                                                                                                                                        |                                                                           |
|--------------------------|--------------------------------------------------------------------------------------------------------------------------------------------------------------------------------------------------------------------------------------------------------------------------------------------------------------------------------------------------------------------------------------------------------------------------------------------|--------------------------------------------------------------------------------------------------------------------------------------------------------------------------------------------------------|---------------------------------------------------------------------------|
|                          | <ul style="list-style-type: none"> <li>- Instrumental music in 2/4 or 4/4 metre</li> <li>- Beat-accentuating metronome cues</li> <li>- Intermittent verbal cueing (e.g., “toe-off” or “step-step”)</li> <li>- Weekly change of music titles</li> <li>- Gradual increase in tempo</li> </ul>                                                                                                                                                |                                                                                                                                                                                                        |                                                                           |
| <b>4 WHAT PROCEDURES</b> | - Introduction to cued MI, familiarisation and training                                                                                                                                                                                                                                                                                                                                                                                    | - Introduction to MI and gait training with cueing, familiarisation and training                                                                                                                       | - Introduction to gait training with cueing, familiarisation and training |
|                          | <ul style="list-style-type: none"> <li>- In lay language; description of the concept of MI; its application in sports and neurorehabilitation; MI perspectives (internal and external) and modes (visual, kinaesthetic).</li> <li>- Measurement of actual and imagined walking duration over a 6-metre distance to monitor the mental process</li> <li>- Performance feedback for participants and repeated training if desired</li> </ul> |                                                                                                                                                                                                        |                                                                           |
|                          |                                                                                                                                                                                                                                                                                                                                                                                                                                            | <ul style="list-style-type: none"> <li>- In lay language; description of the concept of cued gait training and sensorimotor interaction; its application in sports and neurorehabilitation;</li> </ul> |                                                                           |

|                                   |                                                                                                                                                                                                                                                                                |                                                                                                                                                                                                                                                                                    |
|-----------------------------------|--------------------------------------------------------------------------------------------------------------------------------------------------------------------------------------------------------------------------------------------------------------------------------|------------------------------------------------------------------------------------------------------------------------------------------------------------------------------------------------------------------------------------------------------------------------------------|
|                                   |                                                                                                                                                                                                                                                                                | <p>gait synchronisation with the music/metronome beat; musical tempo modulations.</p> <ul style="list-style-type: none"> <li>- Additional introduction to rhythmic auditory stimulation plus its use in neurorehabilitation</li> <li>- Rhythmic-cued MI familiarisation</li> </ul> |
|                                   | <ul style="list-style-type: none"> <li>- Weekly phone calls for training support, adherence and adverse events reports</li> <li>- Phone calls at 4-week follow-up for feedback</li> </ul>                                                                                      |                                                                                                                                                                                                                                                                                    |
| <p><b>PETTLEP Elements</b></p>    |                                                                                                                                                                                                                                                                                | <p><b>Rhythmic-cued gait training</b></p>                                                                                                                                                                                                                                          |
| <p><b>Position (Physical)</b></p> | <ul style="list-style-type: none"> <li>- Practise at any time of the day when alert</li> <li>- Seated in an upright body position</li> <li>- Shoulders relaxed</li> <li>- Avoid tightening the muscles or moving</li> <li>- Eyes closed</li> <li>- Normal breathing</li> </ul> |                                                                                                                                                                                                                                                                                    |
|                                   |                                                                                                                                                                                                                                                                                | <ul style="list-style-type: none"> <li>- Practice at any time of the day when alert</li> <li>- Use of headphones or earplugs if desired</li> <li>- Walking on a hallway (indoors) and/or familiar straight path (outdoors)</li> </ul>                                              |

1  
2  
3  
4  
5  
6  
7  
8  
9  
10  
11  
12  
13  
14  
15  
16  
17  
18  
19  
20  
21  
22  
23  
24  
25  
26  
27  
28  
29  
30  
31  
32  
33  
34  
35  
36  
37  
38  
39  
40  
41  
42  
43  
44  
45  
46

1  
2  
3  
4  
5  
6  
7  
8  
9  
10  
11  
12  
13  
14  
15  
16  
17  
18  
19  
20  
21  
22  
23  
24  
25  
26  
27  
28  
29  
30  
31  
32  
33  
34  
35  
36  
37  
38  
39  
40  
41  
42  
43  
44  
45  
46

|                             |                                                                                                                                                                                                                                                                                                                                                                                                                                                                                                                          |
|-----------------------------|--------------------------------------------------------------------------------------------------------------------------------------------------------------------------------------------------------------------------------------------------------------------------------------------------------------------------------------------------------------------------------------------------------------------------------------------------------------------------------------------------------------------------|
|                             | <ul style="list-style-type: none"> <li>- Adjusting one’s steps with the music or metronome beat (every second music beat)</li> <li>- Use of walking sticks if required for reasons of safety</li> <li>- Avoid using walking sticks with balance related tasks if safe</li> <li>- Periods of rest as desired</li> </ul>                                                                                                                                                                                                   |
| <b>Environment</b>          | <ul style="list-style-type: none"> <li>- Practice in a quiet place at home</li> <li>- Imagine walking indoors (e.g., a long hallway) and walking outdoors (on a straight and familiar path)</li> </ul>                                                                                                                                                                                                                                                                                                                   |
| <b>Tasks for all groups</b> | <ul style="list-style-type: none"> <li>- Take long/giant strides</li> <li>- Take extremely slow/small and quick strides</li> <li>- Touch the ground with your heels first</li> <li>- Roll your feet on the ground and feel your body weight on your soles</li> <li>- Toe-off</li> <li>- Raise your knees</li> <li>- Pace elegantly and upright like a queen/king</li> <li>- Place/feel your weight on your feet/legs</li> <li>- - Feel the swinging of your arms while walking/swing your arms during walking</li> </ul> |

|                                                    |                                                                                                                                                                                                                          |                                                                                                                                                                                                                                            |
|----------------------------------------------------|--------------------------------------------------------------------------------------------------------------------------------------------------------------------------------------------------------------------------|--------------------------------------------------------------------------------------------------------------------------------------------------------------------------------------------------------------------------------------------|
|                                                    | <ul style="list-style-type: none"> <li>- Stamp your feet while walking, walk forcefully and energetically</li> <li>- Walk effortlessly, feeling lightly</li> <li>- Take wide/narrow steps</li> </ul>                     |                                                                                                                                                                                                                                            |
| <b>Timing of the MI and gait training</b>          | External timing is provided: “imagine yourself walking in time with the music or metronome and verbal cues”                                                                                                              |                                                                                                                                                                                                                                            |
|                                                    |                                                                                                                                                                                                                          | External timing is provided: “walk in time with the music or metronome and verbal cues”                                                                                                                                                    |
|                                                    | <ul style="list-style-type: none"> <li>- Tempo (cadence) is between 80 and 120 steps/minute</li> <li>- Slow, medium and fast music pieces alternate, with a gradual progression in the tempo over the 4 weeks</li> </ul> |                                                                                                                                                                                                                                            |
| <b>Learning</b>                                    | <ul style="list-style-type: none"> <li>- See familiarisation</li> <li>- Weekly phone call support is provided</li> </ul>                                                                                                 |                                                                                                                                                                                                                                            |
| <b>Emotion related to the MI and gait training</b> | <ul style="list-style-type: none"> <li>- MI instructions include motivational and arousal enhancing aspects. See instructions under Tasks.</li> <li>- Motivational instrumental music is used with the MI</li> </ul>     |                                                                                                                                                                                                                                            |
|                                                    |                                                                                                                                                                                                                          | <ul style="list-style-type: none"> <li>- Gait training instructions include motivational and arousal enhancing aspects. See instructions under Tasks.</li> <li>- Motivational instrumental music is used with the gait training</li> </ul> |

1  
2  
3  
4  
5  
6  
7  
8  
9  
10  
11  
12  
13  
14  
15  
16  
17  
18  
19  
20  
21  
22  
23  
24  
25  
26  
27  
28  
29  
30  
31  
32  
33  
34  
35  
36  
37  
38  
39  
40  
41  
42  
43  
44  
45  
46

|                                   |                                                                                                                                                                                                                                                                                                                                                                                                                                                                                                                                                                                                                      |                                                                                                                                                                                                                        |
|-----------------------------------|----------------------------------------------------------------------------------------------------------------------------------------------------------------------------------------------------------------------------------------------------------------------------------------------------------------------------------------------------------------------------------------------------------------------------------------------------------------------------------------------------------------------------------------------------------------------------------------------------------------------|------------------------------------------------------------------------------------------------------------------------------------------------------------------------------------------------------------------------|
| <b>Perspective</b>                | Kinaesthetic MI from an internal, first-person perspective                                                                                                                                                                                                                                                                                                                                                                                                                                                                                                                                                           | No MI                                                                                                                                                                                                                  |
| <b>5 WHO PROVIDES</b>             | <ul style="list-style-type: none"> <li>- The audiomix was created by the lead researcher (BS), an experienced neurological physiotherapist with 11 years of musical training and a PhD in physiotherapy.</li> <li>- The introduction, familiarisation and training is provided by neurological physiotherapists, occupational therapists and psychologists who received a structured and specific training by the lead researcher</li> <li>- All therapist researchers are supervised and supported by the lead researcher</li> <li>- Any intervention related processes are documented by the study team</li> </ul> |                                                                                                                                                                                                                        |
| <b>6 HOW – all delivery modes</b> | <ul style="list-style-type: none"> <li>- MI introduction, familiarisation and training: individually</li> <li>- Monitoring of mental process: individually</li> </ul>                                                                                                                                                                                                                                                                                                                                                                                                                                                |                                                                                                                                                                                                                        |
|                                   |                                                                                                                                                                                                                                                                                                                                                                                                                                                                                                                                                                                                                      | <ul style="list-style-type: none"> <li>- Cued gait training introduction, familiarisation and training: individually</li> <li>- Monitoring of understanding of gait synchronisation with beat: individually</li> </ul> |
|                                   | <ul style="list-style-type: none"> <li>- Weekly phone calls: individually</li> </ul>                                                                                                                                                                                                                                                                                                                                                                                                                                                                                                                                 |                                                                                                                                                                                                                        |
| <b>7 WHERE</b>                    | <ul style="list-style-type: none"> <li>- MI introduction, familiarisation, training and monitoring of mental process: at Medical University of Innsbruck (Centre 1) or Graz (Centre 3), Clinical Department of Neurology or Rehab Centre Münster (Centre 2), Austria</li> </ul>                                                                                                                                                                                                                                                                                                                                      |                                                                                                                                                                                                                        |



|                            |                                                                                                                                                                                                                                                                                                                                                                                                                                                                                                                       |                                                                                                                                                                                                                 |                                         |
|----------------------------|-----------------------------------------------------------------------------------------------------------------------------------------------------------------------------------------------------------------------------------------------------------------------------------------------------------------------------------------------------------------------------------------------------------------------------------------------------------------------------------------------------------------------|-----------------------------------------------------------------------------------------------------------------------------------------------------------------------------------------------------------------|-----------------------------------------|
|                            |                                                                                                                                                                                                                                                                                                                                                                                                                                                                                                                       | - Cued gait training introduction, familiarisation and training: at Medical University of Innsbruck (Centre 1) or Graz (Centre 3), Clinical Department of Neurology or Rehab Centre Münster (Centre 2), Austria |                                         |
|                            | - Cued MI practice: at participants' homes                                                                                                                                                                                                                                                                                                                                                                                                                                                                            |                                                                                                                                                                                                                 |                                         |
|                            |                                                                                                                                                                                                                                                                                                                                                                                                                                                                                                                       | Cued gait training: at participants' homes                                                                                                                                                                      |                                         |
| <b>8 WHEN AND HOW MUCH</b> | 30 minutes, 6 times a week, for 4 weeks                                                                                                                                                                                                                                                                                                                                                                                                                                                                               | 15 & 15 minutes, 6 times a week, for 4 weeks                                                                                                                                                                    | 30 minutes, 6 times a week, for 4 weeks |
| <b>9 TAILORING</b>         | Same intervention for all participants                                                                                                                                                                                                                                                                                                                                                                                                                                                                                | Same intervention for all participants                                                                                                                                                                          | Same intervention for all participants  |
| <b>10 MODIFICATIONS</b>    | No modifications                                                                                                                                                                                                                                                                                                                                                                                                                                                                                                      | No modifications                                                                                                                                                                                                | No modifications                        |
| <b>11 HOW WELL PLANNED</b> | <ul style="list-style-type: none"> <li>- Intervention adherence is assessed using a participant diary and also during weekly phone calls and at post-intervention</li> <li>- Support to intervention adherence is performed by the researchers who instruct participants (guidance and motivation)</li> <li>- Recording in structured support call logs is performed by the researchers who instruct participants</li> <li>- Recording in excel sheets is performed in excel sheets by the lead researcher</li> </ul> |                                                                                                                                                                                                                 |                                         |

1  
2  
3  
4  
5  
6  
7  
8  
9  
10  
11  
12  
13  
14  
15  
16  
17  
18  
19  
20  
21  
22  
23  
24  
25  
26  
27  
28  
29  
30  
31  
32  
33  
34  
35  
36  
37  
38  
39  
40  
41  
42  
43  
44  
45  
46

|                    |                                                                         |
|--------------------|-------------------------------------------------------------------------|
| <b>12 HOW WELL</b> | This is a study protocol and the adherence rates are not yet available. |
| <b>ACTUAL</b>      |                                                                         |

**References**

1. Holmes PS, Collins DJ. The PETTLEP approach to motor imagery: A functional equivalence model for sport psychologists. *J Appl Sport Psychol* 2001;13(1):60-83.
2. Thaut MH. Rhythm, music and the brain. Scientific foundations and clinical applications. New York: Routledge 2007:272.

For peer review only

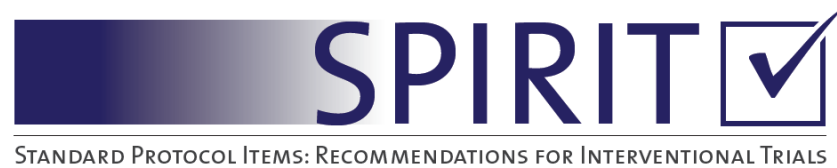

**SPIRIT 2013 and SPIRIT-PRO Extension Checklist:** Recommended Items to Address in a Clinical Trial Protocol

Calvert M, Kyte D, Mercieca-Bebber R, et al. Guidelines for Inclusion of Patient-Reported Outcomes in Clinical Trial Protocols: The SPIRIT-PRO Extension. JAMA : the journal of the American Medical Association 2018;319(5):483-94 doi: 10.1001/jama.2017.21903[published Online First: Epub Date]

| Section/item                      | ItemNo | Description                                                                                                  | SPIRIT-PRO Item No. | SPIRIT-PRO Extension or Elaboration Item Description | Addressed on Page No.   |
|-----------------------------------|--------|--------------------------------------------------------------------------------------------------------------|---------------------|------------------------------------------------------|-------------------------|
| <b>Administrative information</b> |        |                                                                                                              |                     |                                                      |                         |
| Title                             | 1      | Descriptive title identifying the study design, population, interventions, and, if applicable, trial acronym |                     |                                                      | Title page              |
| Trial registration                | 2a     | Trial identifier and registry name. If not yet registered, name of intended registry                         |                     |                                                      | Abstract                |
|                                   | 2b     | All items from the World Health Organization Trial Registration Data Set                                     |                     |                                                      | See below (pages 14-20) |
| Protocol version                  | 3      | Date and version identifier                                                                                  |                     |                                                      | Abstract                |
| Funding                           | 4      | Sources and types of financial, material, and other support                                                  |                     |                                                      | 27                      |

1  
2  
3  
4  
5  
6  
7  
8  
9  
10  
11  
12  
13  
14  
15  
16  
17  
18  
19  
20  
21  
22  
23  
24  
25  
26  
27  
28  
29  
30  
31  
32  
33  
34  
35  
36  
37  
38  
39  
40  
41  
42  
43  
44  
45  
46

|                            |    |                                                                                                                                                                                                                                                                                          |                           |                                                                                  |                              |
|----------------------------|----|------------------------------------------------------------------------------------------------------------------------------------------------------------------------------------------------------------------------------------------------------------------------------------------|---------------------------|----------------------------------------------------------------------------------|------------------------------|
| Roles and responsibilities | 5a | Names, affiliations, and roles of protocol contributors                                                                                                                                                                                                                                  |                           |                                                                                  | 27                           |
|                            | 5b | Name and contact information for the trial sponsor                                                                                                                                                                                                                                       | SPIRIT-5a-PRO Elaboration | Specify the individual(s) responsible for the PRO content of the trial protocol. | See Spirit Item 2B below     |
|                            | 5c | Role of study sponsor and funders, if any, in study design; collection, management, analysis, and interpretation of data; writing of the report; and the decision to submit the report for publication, including whether they will have ultimate authority over any of these activities |                           |                                                                                  | See Spirit Item 2B below; 27 |
|                            | 5d | Composition, roles, and responsibilities of the coordinating centre, steering committee, endpoint adjudication committee, data management team, and other individuals or groups overseeing the trial, if applicable (see Item 21a for data monitoring committee)                         |                           |                                                                                  | 10 and 22                    |
| <b>Introduction</b>        |    |                                                                                                                                                                                                                                                                                          |                           |                                                                                  |                              |

|                                                           |    |                                                                                                                                                                                                           |                         |                                                                                                                              |                          |
|-----------------------------------------------------------|----|-----------------------------------------------------------------------------------------------------------------------------------------------------------------------------------------------------------|-------------------------|------------------------------------------------------------------------------------------------------------------------------|--------------------------|
| Background and rationale                                  | 6a | Description of research question and justification for undertaking the trial, including summary of relevant studies (published and unpublished) examining benefits and harms for each intervention        | SPIRIT-6a-PRO Extension | Describe the PRO-specific research question and rationale for PRO assessment and summarize PRO findings in relevant studies. | 5-6                      |
|                                                           | 6b | Explanation for choice of comparators                                                                                                                                                                     |                         |                                                                                                                              | 5-6                      |
| Objectives                                                | 7  | Specific objectives or hypotheses                                                                                                                                                                         | SPIRIT-7-PRO Extension  | State specific PRO objectives or hypotheses (including relevant PRO concepts/domains).                                       | 6                        |
| Trial design                                              | 8  | Description of trial design including type of trial (eg, parallel group, crossover, factorial, single group), allocation ratio, and framework (eg, superiority, equivalence, noninferiority, exploratory) |                         |                                                                                                                              | Title, Abstract, 4 and 7 |
| <b>Methods: Participants, interventions, and outcomes</b> |    |                                                                                                                                                                                                           |                         |                                                                                                                              |                          |
| Study setting                                             | 9  | Description of study settings (eg, community clinic, academic hospital) and list of countries where data will be collected. Reference to where list of study sites can be obtained                        |                         |                                                                                                                              | 6 and 10                 |

|                                                                                                                                                                                                    |                      |                                                                                                                                                                                                |                                                                                                                                                                                              |                         |                                                                                                                                                                                                                                                                   |                                       |
|----------------------------------------------------------------------------------------------------------------------------------------------------------------------------------------------------|----------------------|------------------------------------------------------------------------------------------------------------------------------------------------------------------------------------------------|----------------------------------------------------------------------------------------------------------------------------------------------------------------------------------------------|-------------------------|-------------------------------------------------------------------------------------------------------------------------------------------------------------------------------------------------------------------------------------------------------------------|---------------------------------------|
| 1<br>2<br>3<br>4<br>5<br>6<br>7<br>8<br>9<br>10<br>11<br>12<br>13                                                                                                                                  | Eligibility criteria | 10                                                                                                                                                                                             | Inclusion and exclusion criteria for participants. If applicable, eligibility criteria for study centres and individuals who will perform the interventions (eg, surgeons, psychotherapists) | SPIRIT-10-PRO Extension | Specify any PRO-specific eligibility criteria (eg, language/reading requirements or prerandomization completion of PRO). If PROs will not be collected from the entire study sample, provide a rationale and describe the method for obtaining the PRO subsample. | 7, Table 1                            |
| 14<br>15<br>16<br>17<br>18<br>19<br>20<br>21<br>22<br>23<br>24<br>25<br>26<br>27<br>28<br>29<br>30<br>31<br>32<br>33<br>34<br>35<br>36<br>37<br>38<br>39<br>40<br>41<br>42<br>43<br>44<br>45<br>46 | Interventions        | 11a                                                                                                                                                                                            | Interventions for each group with sufficient detail to allow replication, including how and when they will be administered                                                                   |                         |                                                                                                                                                                                                                                                                   | 10-11, Figure 1, Supplemental Table 1 |
| 11b                                                                                                                                                                                                |                      | Criteria for discontinuing or modifying allocated interventions for a given trial participant (eg, drug dose change in response to harms, participant request, or improving/worsening disease) |                                                                                                                                                                                              |                         | 22, Table 2                                                                                                                                                                                                                                                       |                                       |
| 11c                                                                                                                                                                                                |                      | Strategies to improve adherence to intervention protocols, and any procedures for monitoring adherence (eg, drug tablet return, laboratory tests)                                              |                                                                                                                                                                                              |                         | 7, 11, 15, Figure 2, Supplemental File 3                                                                                                                                                                                                                          |                                       |
| 11d                                                                                                                                                                                                |                      | Relevant concomitant care and interventions that are permitted or prohibited during the trial                                                                                                  |                                                                                                                                                                                              |                         | Tables 1 and 2 including legends                                                                                                                                                                                                                                  |                                       |

|                      |    |                                                                                                                                                                                                                                                                                                                                                                                |                         |                                                                                                                                                                                                                                                                                                                                 |                |
|----------------------|----|--------------------------------------------------------------------------------------------------------------------------------------------------------------------------------------------------------------------------------------------------------------------------------------------------------------------------------------------------------------------------------|-------------------------|---------------------------------------------------------------------------------------------------------------------------------------------------------------------------------------------------------------------------------------------------------------------------------------------------------------------------------|----------------|
| Outcomes             | 12 | Primary, secondary, and other outcomes, including the specific measurement variable (eg, systolic blood pressure), analysis metric (eg, change from baseline, final value, time to event), method of aggregation (eg, median, proportion), and time point for each outcome. Explanation of the clinical relevance of chosen efficacy and harm outcomes is strongly recommended | SPIRIT-12-PRO Extension | Specify the PRO concepts/domains used to evaluate the intervention (eg, overall health-related quality of life, specific domain, specific symptom) and, for each one, the analysis metric (eg, change from baseline, final value, time to event) and the principal time point or period of interest.                            | 12-22, Table 2 |
| Participant timeline | 13 | Time schedule of enrolment, interventions (including any run-ins and washouts), assessments, and visits for participants. A schematic diagram is highly recommended (see Figure)                                                                                                                                                                                               | SPIRIT-13-PRO Extension | Include a schedule of PRO assessments, providing a rationale for the time points, and justifying if the initial assessment is not prerandomization. Specify time windows, whether PRO collection is prior to clinical assessments, and, if using multiple questionnaires, whether order of administration will be standardized. | 10, Table 2    |
| Sample size          | 14 | Estimated number of participants needed to achieve study objectives and how it was determined, including clinical and statistical assumptions supporting any sample size calculations                                                                                                                                                                                          | SPIRIT-14-PRO Extension | When a PRO is the primary end point, state the required sample size (and how it was determined) and recruitment target (accounting for expected loss to follow-up). If sample size is not established based on the PRO end point, then discuss the power of the principal PRO analyses.                                         | 7              |

|   |                                                                     |     |                                                                                                                                                                                                                                                                                                                                                          |  |  |    |
|---|---------------------------------------------------------------------|-----|----------------------------------------------------------------------------------------------------------------------------------------------------------------------------------------------------------------------------------------------------------------------------------------------------------------------------------------------------------|--|--|----|
| 1 | Recruitment                                                         | 15  | Strategies for achieving adequate participant enrolment to reach target sample size                                                                                                                                                                                                                                                                      |  |  | 10 |
| 2 | <b>Methods: Assignment of interventions (for controlled trials)</b> |     |                                                                                                                                                                                                                                                                                                                                                          |  |  |    |
| 3 | Allocation:                                                         |     |                                                                                                                                                                                                                                                                                                                                                          |  |  |    |
| 4 | Sequence generation                                                 | 16a | Method of generating the allocation sequence (eg, computer-generated random numbers), and list of any factors for stratification. To reduce predictability of a random sequence, details of any planned restriction (eg, blocking) should be provided in a separate document that is unavailable to those who enrol participants or assign interventions |  |  | 10 |
| 5 | Allocation concealment mechanism                                    | 16b | Mechanism of implementing the allocation sequence (eg, central telephone; sequentially numbered, opaque, sealed envelopes), describing any steps to conceal the sequence until interventions are assigned                                                                                                                                                |  |  | 10 |
| 6 | Implementation                                                      | 16c | Who will generate the allocation sequence, who will enrol participants, and who will assign participants to interventions                                                                                                                                                                                                                                |  |  | 10 |



|                                                           |     |                                                                                                                                                                                                                                                                                                                                                                                                              |                               |                                                                                                                                                                                                                                                                                                                                                                                                                                                                                                                                    |                                        |
|-----------------------------------------------------------|-----|--------------------------------------------------------------------------------------------------------------------------------------------------------------------------------------------------------------------------------------------------------------------------------------------------------------------------------------------------------------------------------------------------------------|-------------------------------|------------------------------------------------------------------------------------------------------------------------------------------------------------------------------------------------------------------------------------------------------------------------------------------------------------------------------------------------------------------------------------------------------------------------------------------------------------------------------------------------------------------------------------|----------------------------------------|
| Blinding (masking)                                        | 17a | Who will be blinded after assignment to interventions (eg, trial participants, care providers, outcome assessors, data analysts), and how                                                                                                                                                                                                                                                                    |                               |                                                                                                                                                                                                                                                                                                                                                                                                                                                                                                                                    | 10                                     |
|                                                           | 17b | If blinded, circumstances under which unblinding is permissible, and procedure for revealing a participant's allocated intervention during the trial                                                                                                                                                                                                                                                         |                               |                                                                                                                                                                                                                                                                                                                                                                                                                                                                                                                                    | 10                                     |
| <b>Methods: Data collection, management, and analysis</b> |     |                                                                                                                                                                                                                                                                                                                                                                                                              |                               |                                                                                                                                                                                                                                                                                                                                                                                                                                                                                                                                    |                                        |
| Data collection methods                                   | 18a | Plans for assessment and collection of outcome, baseline, and other trial data, including any related processes to promote data quality (eg, duplicate measurements, training of assessors) and a description of study instruments (eg, questionnaires, laboratory tests) along with their reliability and validity, if known. Reference to where data collection forms can be found, if not in the protocol | SPIRIT-18a (i)-PRO Extension  | Justify the PRO instrument to be used and describe domains, number of items, recall period, and instrument scaling and scoring (eg, range and direction of scores indicating a good or poor outcome). Evidence of PRO instrument measurement properties, interpretation guidelines, and patient acceptability and burden should be provided or cited if available, ideally in the population of interest. State whether the measure will be used in accordance with any user manual and specify and justify deviations if planned. | 2, 12-22, Table 2, Figure 2            |
|                                                           |     |                                                                                                                                                                                                                                                                                                                                                                                                              | SPIRIT-18a (ii)-PRO Extension | Include a data collection plan outlining the permitted mode(s) of administration (eg, paper, telephone, electronic, other) and setting (eg, clinic, home, other).                                                                                                                                                                                                                                                                                                                                                                  | 2, 4, 11, Table 2, Supplemental File 3 |

1  
2  
3  
4  
5  
6  
7  
8  
9  
10  
11  
12  
13  
14  
15  
16  
17  
18  
19  
20  
21  
22  
23  
24  
25  
26  
27  
28  
29  
30  
31  
32  
33  
34  
35  
36  
37  
38  
39  
40  
41  
42  
43  
44  
45  
46

|                 |     |                                                                                                                                                                                                                                                                   |                                 |                                                                                                                                                                                                                                                               |                    |
|-----------------|-----|-------------------------------------------------------------------------------------------------------------------------------------------------------------------------------------------------------------------------------------------------------------------|---------------------------------|---------------------------------------------------------------------------------------------------------------------------------------------------------------------------------------------------------------------------------------------------------------|--------------------|
|                 |     |                                                                                                                                                                                                                                                                   | SPIRIT-18a (iii)-PRO Extension  | Specify whether more than 1 language version will be used and state whether translated versions have been developed using currently recommended methods.                                                                                                      | 8, 20-21, 26-27    |
|                 |     |                                                                                                                                                                                                                                                                   | SPIRIT-18a (iv)-PRO Extension   | When the trial context requires someone other than a trial participant to answer on his or her behalf (a proxy-reported outcome), state and justify the use of a proxy respondent. Provide or cite evidence of the validity of proxy assessment if available. | NA                 |
|                 | 18b | Plans to promote participant retention and complete follow-up, including list of any outcome data to be collected for participants who discontinue or deviate from intervention protocols                                                                         | SPIRIT-18b (i)-PRO Extension    | Specify PRO data collection and management strategies for minimizing avoidable missing data.                                                                                                                                                                  | 7, 11, 22, Table 2 |
|                 |     |                                                                                                                                                                                                                                                                   | SPIRIT-18b (ii)-PRO Elaboration | Describe the process of PRO assessment for participants who discontinue or deviate from the assigned intervention protocol.                                                                                                                                   | 22-23              |
| Data management | 19  | Plans for data entry, coding, security, and storage, including any related processes to promote data quality (eg, double data entry; range checks for data values). Reference to where details of data management procedures can be found, if not in the protocol |                                 |                                                                                                                                                                                                                                                               | 22, 24-25          |

|                                                                      |                            |     |                                                                                                                                                                                                                                                                                                                                       |                                |                                                                                                                                                                          |        |
|----------------------------------------------------------------------|----------------------------|-----|---------------------------------------------------------------------------------------------------------------------------------------------------------------------------------------------------------------------------------------------------------------------------------------------------------------------------------------|--------------------------------|--------------------------------------------------------------------------------------------------------------------------------------------------------------------------|--------|
| 1<br>2<br>3<br>4<br>5<br>6<br>7<br>8<br>9                            | Statistical methods        | 20a | Statistical methods for analysing primary and secondary outcomes. Reference to where other details of the statistical analysis plan can be found, if not in the protocol                                                                                                                                                              | SPIRIT- 20a-PRO<br>Elaboration | State PRO analysis methods, including any plans for addressing multiplicity/type I ( $\alpha$ ) error.                                                                   | 22-24  |
| 10<br>11<br>12<br>13                                                 |                            | 20b | Methods for any additional analyses (eg, subgroup and adjusted analyses)                                                                                                                                                                                                                                                              |                                |                                                                                                                                                                          | 24     |
| 14<br>15<br>16<br>17<br>18<br>19<br>20                               |                            | 20c | Definition of analysis population relating to protocol non-adherence (eg, as randomised analysis), and any statistical methods to handle missing data (eg, multiple imputation)                                                                                                                                                       | SPIRIT- 20c-PRO<br>Elaboration | State how missing data will be described and outline the methods for handling missing items or entire assessments (eg, approach to imputation and sensitivity analyses). | 22-23  |
| 21<br>22                                                             | <b>Methods: Monitoring</b> |     |                                                                                                                                                                                                                                                                                                                                       |                                |                                                                                                                                                                          |        |
| 23<br>24<br>25<br>26<br>27<br>28<br>29<br>30<br>31<br>32<br>33<br>34 | Data monitoring            | 21a | Composition of data monitoring committee (DMC); summary of its role and reporting structure; statement of whether it is independent from the sponsor and competing interests; and reference to where further details about its charter can be found, if not in the protocol. Alternatively, an explanation of why a DMC is not needed |                                |                                                                                                                                                                          | 21, 27 |

1  
2  
3  
4  
5  
6  
7  
8  
9  
10  
11  
12  
13  
14  
15  
16  
17  
18  
19  
20  
21  
22  
23  
24  
25  
26  
27  
28  
29  
30  
31  
32  
33  
34  
35  
36  
37  
38  
39  
40  
41  
42  
43  
44  
45  
46

|                                 |     |                                                                                                                                                                                   |                           |                                                                                                                                                                                                                                                                                                                   |                            |
|---------------------------------|-----|-----------------------------------------------------------------------------------------------------------------------------------------------------------------------------------|---------------------------|-------------------------------------------------------------------------------------------------------------------------------------------------------------------------------------------------------------------------------------------------------------------------------------------------------------------|----------------------------|
|                                 | 21b | Description of any interim analyses and stopping guidelines, including who will have access to these interim results and make the final decision to terminate the trial           |                           |                                                                                                                                                                                                                                                                                                                   | NA                         |
| Harms                           | 22  | Plans for collecting, assessing, reporting, and managing solicited and spontaneously reported adverse events and other unintended effects of trial interventions or trial conduct | SPIRIT- 22- PRO Extension | State whether or not PRO data will be monitored during the study to inform the clinical care of individual trial participants and, if so, how this will be managed in a standardized way. Describe how this process will be explained to participants; eg, in the participant information sheet and consent form. | Table 2, Figure 2, page 22 |
| Auditing                        | 23  | Frequency and procedures for auditing trial conduct, if any, and whether the process will be independent from investigators and the sponsor                                       |                           |                                                                                                                                                                                                                                                                                                                   | NA                         |
| <b>Ethics and dissemination</b> |     |                                                                                                                                                                                   |                           |                                                                                                                                                                                                                                                                                                                   |                            |
| Research ethics approval        | 24  | Plans for seeking research ethics committee/institutional review board (REC/IRB) approval                                                                                         |                           |                                                                                                                                                                                                                                                                                                                   | 3, 26                      |

|                          |     |                                                                                                                                                                                                                                  |  |  |                         |
|--------------------------|-----|----------------------------------------------------------------------------------------------------------------------------------------------------------------------------------------------------------------------------------|--|--|-------------------------|
| Protocol amendments      | 25  | Plans for communicating important protocol modifications (eg, changes to eligibility criteria, outcomes, analyses) to relevant parties (eg, investigators, REC/IRBs, trial participants, trial registries, journals, regulators) |  |  | NA                      |
| Consent or assent        | 26a | Who will obtain informed consent or assent from potential trial participants or authorised surrogates, and how (see Item 32)                                                                                                     |  |  | 10, Supplemental File 2 |
|                          | 26b | Additional consent provisions for collection and use of participant data and biological specimens in ancillary studies, if applicable                                                                                            |  |  | NA                      |
| Confidentiality          | 27  | How personal information about potential and enrolled participants will be collected, shared, and maintained in order to protect confidentiality before, during, and after the trial                                             |  |  | 27, Supplemental File 2 |
| Declaration of interests | 28  | Financial and other competing interests for principal investigators for the overall trial and each study site                                                                                                                    |  |  | 27                      |
| Access to data           | 29  | Statement of who will have access to the final trial dataset, and disclosure of contractual agreements that limit such access for investigators                                                                                  |  |  | 22                      |

|                               |     |                                                                                                                                                                                                                                                                                     |  |  |                     |
|-------------------------------|-----|-------------------------------------------------------------------------------------------------------------------------------------------------------------------------------------------------------------------------------------------------------------------------------------|--|--|---------------------|
| Ancillary and post-trial care | 30  | Provisions, if any, for ancillary and post-trial care, and for compensation to those who suffer harm from trial participation                                                                                                                                                       |  |  | 22                  |
| Dissemination policy          | 31a | Plans for investigators and sponsor to communicate trial results to participants, healthcare professionals, the public, and other relevant groups (eg, via publication, reporting in results databases, or other data sharing arrangements), including any publication restrictions |  |  | 3, 27               |
|                               | 31b | Authorship eligibility guidelines and any intended use of professional writers                                                                                                                                                                                                      |  |  | 27                  |
|                               | 31c | Plans, if any, for granting public access to the full protocol, participant-level dataset, and statistical code                                                                                                                                                                     |  |  | 27                  |
| <b>Appendices</b>             |     |                                                                                                                                                                                                                                                                                     |  |  |                     |
| Informed consent materials    | 32  | Model consent form and other related documentation given to participants and authorised surrogates                                                                                                                                                                                  |  |  | Supplemental File 2 |

1  
2  
3  
4  
5  
6  
7  
8  
9  
10  
11  
12  
13  
14  
15  
16  
17  
18  
19  
20  
21  
22  
23  
24  
25  
26  
27  
28  
29  
30  
31  
32  
33  
34  
35  
36  
37  
38  
39  
40  
41  
42  
43  
44  
45  
46

|                      |    |                                                                                                                                                                                                |  |  |    |
|----------------------|----|------------------------------------------------------------------------------------------------------------------------------------------------------------------------------------------------|--|--|----|
| Biological specimens | 33 | Plans for collection, laboratory evaluation, and storage of biological specimens for genetic or molecular analysis in the current trial and for future use in ancillary studies, if applicable |  |  | NA |
|----------------------|----|------------------------------------------------------------------------------------------------------------------------------------------------------------------------------------------------|--|--|----|

Abbreviations: SPIRIT, Standard Protocol Items: Recommendations for Interventional Trials; PRO, patient-reported outcome.

\*It is strongly recommended that this checklist be read in conjunction with the SPIRIT 2013 Explanation & Elaboration for important clarification on the items. Amendments to the protocol should be tracked and dated. The SPIRIT checklist is copyrighted by the SPIRIT Group under the Creative Commons "[Attribution-NonCommercial-NoDerivs 3.0 Unported](#)" license and is reproduced with permission.

### Spirit Item 2B WHO Trial Registration Dataset

| Data Category                                 | Information                                                                                                                            |
|-----------------------------------------------|----------------------------------------------------------------------------------------------------------------------------------------|
| Primary registry and trial identifying number | German Clinical Trials Register<br><a href="https://www.drks.de/drks_web/">https://www.drks.de/drks_web/</a><br>Trial ID: DRKS00023978 |
| Date of registration in primary registry      | 28.12.2020                                                                                                                             |
| Secondary identifying numbers                 | Universal Trials Number (UTN): U1111-1263-1856<br>Ethics approval reference number: 1347/2020                                          |

|                                           |                                                                                                                                                                                                                                                                                                                                                                                                                                                                                   |
|-------------------------------------------|-----------------------------------------------------------------------------------------------------------------------------------------------------------------------------------------------------------------------------------------------------------------------------------------------------------------------------------------------------------------------------------------------------------------------------------------------------------------------------------|
| Source(s) of monetary or material support | <p>This study is an independent academic study, which is conducted with the financial support of Celgene, a company of Bristol Myers Squibb (NA-CL-MS-PI-13909_Seebacher: Effects of actual and imagined music-cued gait training on motor functioning and brain activity in people with multiple sclerosis: a multicentre study).</p> <p>The people involved in decision-marking about this funding have no influence on the planning, conduct and publication of the study.</p> |
| Primary sponsor                           | Medical University of Innsbruck, Austria                                                                                                                                                                                                                                                                                                                                                                                                                                          |
| Secondary sponsor(s)                      | N/A                                                                                                                                                                                                                                                                                                                                                                                                                                                                               |
| Contact for public queries                | <p>Dr Barbara Seebacher</p> <p>Phone: +435050482499</p> <p>Email: barbara.seebacher@i-med.ac.at</p>                                                                                                                                                                                                                                                                                                                                                                               |
| Contact for scientific queries            | <p>Dr Barbara Seebacher</p> <p>Phone: +435050482499</p> <p>Email: barbara.seebacher@i-med.ac.at</p>                                                                                                                                                                                                                                                                                                                                                                               |



|                                           |                                                                                                                                                                                                                                                                                                                                                                                                                                                                                                                                                                     |
|-------------------------------------------|---------------------------------------------------------------------------------------------------------------------------------------------------------------------------------------------------------------------------------------------------------------------------------------------------------------------------------------------------------------------------------------------------------------------------------------------------------------------------------------------------------------------------------------------------------------------|
| Public Title                              | Effects of actual and imagined music-stimulated gait training on motor functioning and brain activity in people with multiple sclerosis: a multicentre study                                                                                                                                                                                                                                                                                                                                                                                                        |
| Scientific Title                          | Effects of actual and imagined music-cued gait training on motor functioning and brain activity in people with multiple sclerosis: a multicentre study                                                                                                                                                                                                                                                                                                                                                                                                              |
| Countries of recruitment                  | Austria                                                                                                                                                                                                                                                                                                                                                                                                                                                                                                                                                             |
| Health condition(s) or problem(s) studied | Multiple sclerosis (MS)                                                                                                                                                                                                                                                                                                                                                                                                                                                                                                                                             |
| Intervention(s)                           | <p>Group 1: Motor imagery (MI) with music cueing; the music beat is accentuated using metronome cueing and intermittent verbal cueing; 30 min, 4x per week, for 4 weeks</p> <p>Group 2: MI with music cueing (the music beat is accentuated using metronome cueing and intermittent verbal cueing) plus gait training with music cueing; 15 &amp; 15 min, 4x per week, for 4 weeks</p> <p>Group 3: Gait training alone with music cueing; the music beat is accentuated using metronome cueing and intermittent verbal cueing; 30 min, 4x per week, for 4 weeks</p> |

|                                                                                                                                                                                                                                                                                                                     |                                                                                                                                                                                                                                                                                                                                                                                                                                                                                                                                                                                                                                                                                                                                                                                                                                                                                                                                                                                                                                                                                                                              |
|---------------------------------------------------------------------------------------------------------------------------------------------------------------------------------------------------------------------------------------------------------------------------------------------------------------------|------------------------------------------------------------------------------------------------------------------------------------------------------------------------------------------------------------------------------------------------------------------------------------------------------------------------------------------------------------------------------------------------------------------------------------------------------------------------------------------------------------------------------------------------------------------------------------------------------------------------------------------------------------------------------------------------------------------------------------------------------------------------------------------------------------------------------------------------------------------------------------------------------------------------------------------------------------------------------------------------------------------------------------------------------------------------------------------------------------------------------|
| 1<br>2<br>3<br>4<br>5<br>6<br>7<br>8<br>9<br>10<br>11<br>12<br>13<br>14<br>15<br>16<br>17<br>18<br>19<br>20<br>21<br>22<br>23<br>24<br>25<br>26<br>27<br>28<br>29<br>30<br>31<br>32<br>33<br>34<br>35<br>36<br>37<br>38<br>39<br>40<br>41<br>42<br>43<br>44<br>45<br>46<br><br>Key inclusion and exclusion criteria | Inclusion criteria: people with any MS phenotype according to the revised McDonald's criteria; aged 18 years or over; any ethnicity; disability status score on the EDSS of 2.0 to 5.0; stable disease; no evidence of disease activity; and able to speak and understand German language.<br><br>Exclusion criteria: people with MS with concomitant diseases (such as malignant diseases, other neurological or psychiatric disorders, musculoskeletal problems affecting walking, pain, uncorrected visual or hearing impairment); cognitive impairment as defined by a MoCA cut-off score of 26/30 (<26 = impaired cognition; ≥26 = intact cognition); anxiety or depression as signified by a HADS anxiety subscale score of 11/21 or a depression subscale score of 11/21 or suicidality as evaluated by a narrative screening; pregnancy; a relapse of MS within the last three months; any medication initiation or change (including corticosteroids) or any physiotherapy change within three months prior to the study; any change of symptomatic treatment affecting walking (medication or physiotherapy) or of |
|---------------------------------------------------------------------------------------------------------------------------------------------------------------------------------------------------------------------------------------------------------------------------------------------------------------------|------------------------------------------------------------------------------------------------------------------------------------------------------------------------------------------------------------------------------------------------------------------------------------------------------------------------------------------------------------------------------------------------------------------------------------------------------------------------------------------------------------------------------------------------------------------------------------------------------------------------------------------------------------------------------------------------------------------------------------------------------------------------------------------------------------------------------------------------------------------------------------------------------------------------------------------------------------------------------------------------------------------------------------------------------------------------------------------------------------------------------|

|                         |                                                                                                                                                                                                                                                                                                                                                                                                                                                                                                                                                                                               |
|-------------------------|-----------------------------------------------------------------------------------------------------------------------------------------------------------------------------------------------------------------------------------------------------------------------------------------------------------------------------------------------------------------------------------------------------------------------------------------------------------------------------------------------------------------------------------------------------------------------------------------------|
|                         | <p>disease modifying treatment (DMT) during the study will lead to an exclusion of the participant from the further analysis.</p> <p>Any MRI/fMRI contraindications, e.g. implanted ferrous metal, heart pacemaker or claustrophobia.</p> <p>Healthy controls for the fMRI scanning: 15 age- and gender matched healthy controls without any history of neurological, psychiatric, orthopaedic or other disorder.</p>                                                                                                                                                                         |
| Study type              | <p>Prospective double-blind randomised parallel multicentre trial</p> <p>Allocation: stratified blocked randomisation with allocation concealment</p> <p>Intervention model: parallel assignment (1:1:1)</p> <p>Masking: assessor-blinded; patients blinded to the study hypotheses</p> <p>Primary study aim: to investigate whether there is a difference between the effects of accentuated music- and verbally cued MI, accentuated music- and verbally cued MI combined with gait training and accentuated music- and verbally cued gait training alone on walking in people with MS.</p> |
| Date of first enrolment | 09.02.2021                                                                                                                                                                                                                                                                                                                                                                                                                                                                                                                                                                                    |

|                                                                                                                                                                |                    |                                                                                                                                                                                                                                                                                                                                                                                                                                                                                                                                                                                                                                                                                                                                      |
|----------------------------------------------------------------------------------------------------------------------------------------------------------------|--------------------|--------------------------------------------------------------------------------------------------------------------------------------------------------------------------------------------------------------------------------------------------------------------------------------------------------------------------------------------------------------------------------------------------------------------------------------------------------------------------------------------------------------------------------------------------------------------------------------------------------------------------------------------------------------------------------------------------------------------------------------|
| 1<br>2<br>3<br>4                                                                                                                                               | Target sample size | 132 people with MS and 15 healthy controls (fMRT)                                                                                                                                                                                                                                                                                                                                                                                                                                                                                                                                                                                                                                                                                    |
| 5<br>6<br>7                                                                                                                                                    | Recruitment status | Recruiting                                                                                                                                                                                                                                                                                                                                                                                                                                                                                                                                                                                                                                                                                                                           |
| 8<br>9<br>10<br>11                                                                                                                                             | Primary outcome(s) | <ul style="list-style-type: none"> <li>• Walking speed as assessed by the Timed 25-Foot Walk (T25FW)</li> <li>• Walking distance as assessed by the 2-Minute Walk Test (2MWT)</li> </ul>                                                                                                                                                                                                                                                                                                                                                                                                                                                                                                                                             |
| 12<br>13<br>14<br>15<br>16<br>17<br>18<br>19<br>20<br>21<br>22<br>23<br>24<br>25<br>26<br>27<br>28<br>29<br>30<br>31<br>32<br>33<br>34<br>35<br>36<br>37<br>38 | Secondary outcomes | <ul style="list-style-type: none"> <li>• Brain activation patterns as assessed by fMRI (and structural MRI); in addition to patients, healthy controls will be scanned at baseline and 4 weeks later, corresponding with the intervention period of this study</li> <li>• MS related fatigue as assessed by the validated German version of the Neurological Fatigue Index (NFI-MS)</li> <li>• MS related health-related QoL, HRQoL as assessed by the validated German version of the Multiple Sclerosis International Quality of Life (MusiQoL) questionnaire</li> <li>• MI ability as measured by the validated German version KVIQ-G-10 of the Kinaesthetic and Visual Imagery Questionnaire, short version (KVIQ-10)</li> </ul> |

- |  |                                                                                                                                                                                                                                                                                                                                                                                                                                                                                                                                                                                                                                                                                                                                                                                                                                                                                                                                                                                         |
|--|-----------------------------------------------------------------------------------------------------------------------------------------------------------------------------------------------------------------------------------------------------------------------------------------------------------------------------------------------------------------------------------------------------------------------------------------------------------------------------------------------------------------------------------------------------------------------------------------------------------------------------------------------------------------------------------------------------------------------------------------------------------------------------------------------------------------------------------------------------------------------------------------------------------------------------------------------------------------------------------------|
|  | <ul style="list-style-type: none"><li>• MI ability as measured by a mental chronometry test comparing the duration of imagined and real walking on a 6-metre walkway</li><li>• Anxiety and depression as assessed by the German version of the HADS, complemented by additional narrative screening for suicidality</li><li>• Global cognitive impairment as assessed by the German version of the Montreal Cognitive Assessment (MoCA)</li><li>• Psychomotor speed, attention, visual scanning and tracking and working memory as assessed by the Symbol Digit Modalities Test (SDMT)</li><li>• Music-induced motivation / the motivational qualities of music as assessed by the Brunel Music Rating Inventory-2 (BMRI-2)</li><li>• Music-induced pleasure and arousal as assessed by the Pictorial Self-Assessment Manikin (SAM)</li><li>• MS specific self-efficacy as assessed by the validated German version of the Unidimensional Self-Efficacy Scale for MS (USE-MS)</li></ul> |
|--|-----------------------------------------------------------------------------------------------------------------------------------------------------------------------------------------------------------------------------------------------------------------------------------------------------------------------------------------------------------------------------------------------------------------------------------------------------------------------------------------------------------------------------------------------------------------------------------------------------------------------------------------------------------------------------------------------------------------------------------------------------------------------------------------------------------------------------------------------------------------------------------------------------------------------------------------------------------------------------------------|

1  
2  
3  
4  
5  
6  
7  
8  
9  
10  
11  
12  
13  
14  
15  
16  
17  
18  
19  
20  
21  
22  
23  
24  
25  
26  
27  
28  
29  
30  
31  
32  
33  
34  
35  
36  
37  
38  
39  
40  
41  
42  
43  
44  
45  
46

|  |                                                                                                                                                                                                                                                                                                                                                                                                                                                                                                                                                                                                                                                                                                      |
|--|------------------------------------------------------------------------------------------------------------------------------------------------------------------------------------------------------------------------------------------------------------------------------------------------------------------------------------------------------------------------------------------------------------------------------------------------------------------------------------------------------------------------------------------------------------------------------------------------------------------------------------------------------------------------------------------------------|
|  | <ul style="list-style-type: none"> <li>• Number of falls in the intervention and follow-up periods (falls log, telephone interviews)</li> <li>• Home-based training management and coping, barriers to, facilitators of and problems with the training, documentation of the training frequency and duration (support will be provided) (weekly semi-structured telephone interviews during the intervention period)</li> <li>• Feedback on the general health status, walking, fatigue, training content and suggestions for adaptations of the intervention in a potential follow-up study, falls and documentation of falls (semi-structured telephone interview at 4-weeks follow-up)</li> </ul> |
|--|------------------------------------------------------------------------------------------------------------------------------------------------------------------------------------------------------------------------------------------------------------------------------------------------------------------------------------------------------------------------------------------------------------------------------------------------------------------------------------------------------------------------------------------------------------------------------------------------------------------------------------------------------------------------------------------------------|

For peer review only

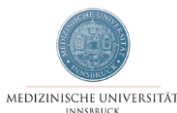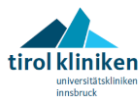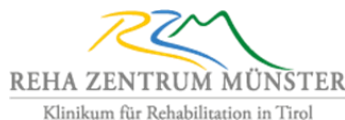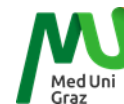

RIGMUC

PIS\_ICF, Version 1.1 of 28.11.2020

**Medizinische Universität Innsbruck  
UNIVERSITÄTSKLINIK FÜR NEUROLOGIE**

**Karl Landsteiner Institut für interdisziplinäre Forschung  
REHA ZENTRUM MÜNSTER**

**Steiermärkische Krankenanstalten Ges.m.b.H. Landeskrankenhaus -  
Universitätskliniken - Graz  
UNIVERSITÄTSKLINIK FÜR NEUROLOGIE  
MEDIZINISCHE UNIVERSITÄT GRAZ**

**Protocol RIGMUC, Version 1.1 of 28.11.2020**

***Patient Information Sheet and Informed Consent Form for  
participation in the clinical study***

**Effects of actual and imagined music-cued gait training on motor functioning  
and brain activity in people with multiple sclerosis: protocol of a randomised  
parallel multicentre trial (RIGMUC)**

Dear Patient,

We invite you to take part in the above mentioned clinical study. The patient information on the study details will take place as part of a medical consultation.

**Your participation in this clinical study is entirely voluntary. You can withdraw from the study at any time without giving a reason. The refusal to participate or a withdrawal from this study will not have any negative consequences for your medical care.**

Clinical studies are necessary for obtaining reliable new medical research results. An indispensable prerequisite for the conduct of a clinical study is that you provide written informed consent to participate in this clinical study. Please read the following text carefully - as a supplement to the consultation with your study physician - and do not hesitate to ask questions.

Please only provide written informed consent

- if you fully understand the type and process of the clinical trial,
- if you are ready to agree to participate and
- if you are aware of your rights as a participant in this clinical trial.

The responsible ethics committee issued a favourable opinion to this clinical study as well as on the patient information sheet and the informed consent form.

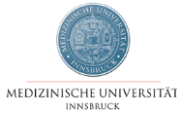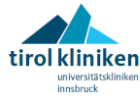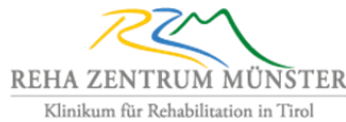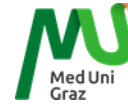

RIGMUC

PIS\_ICF, Version 1.1 of 28.11.2020

## 1. What is the purpose of this clinical study?

Rehabilitation is very important for people with multiple sclerosis (MS) in order to improve their independence in daily life. Physiotherapy serves to improve and maintain the ability to walk. Many novel physiotherapy approaches for people with MS have been developed in recent years. Among other things, the use of music was found to be helpful in training gait rhythm, walking speed and walking distance. The effectiveness of motor imagery on walking and fatigue in people with MS has also been demonstrated. However, some questions remain open: Is pure physical training superior to motor imagery, or is it the other way around? Does a combination of the two have a greater or lesser effect? Are there learning effects in the brain after such a therapy that can be detected with magnetic resonance imaging (MRI)? Which of the three approaches to physical therapy is most popular with people with MS at home? It is our aim to clarify these questions with a multicentre study. The purpose of the study is to examine the effectiveness of three different gait training types with music.

## 2. How does the clinical study work?

This clinical trial will be conducted at multiple locations and plans to enroll a total of 132 people with MS. Study centres are the Clinical Department of Neurology at the Medical Universities of Innsbruck and Graz and the Rehabilitation Centre in Münster.

The following measures will be carried out exclusively for study reasons:

Your therapy period within this study is expected to be 4 weeks. You can carry out your therapy at home with an electronic study file or CD and will be supported by your study therapist over the phone. A total of 3 examinations with a maximum duration of 90 minutes will take place: The first examination takes place before the 4-week therapy, the second examination takes place immediately after the 4-week therapy, and the third examination takes place 3 months after your last therapy takes place, so your participation in this clinical trial is expected to take 4 months.

You will be informed about the study in a detailed medical discussion and can calmly consider your participation and discuss it with relatives. If you are interested in participating, your suitability for the study will be examined with a questionnaire and a clinical test. In the event of suitability and after you have signed the informed consent form, information on your neurological history will be collected on the basis of existing medical records after your consent.

In the following you will be examined by a physiotherapist and occupational therapist and one of the three therapies will be randomly drawn. The examinations include walking tests, questionnaires and tests for motor imagery. You will then receive information about your therapy at home (4x per week, 30 minutes, for 4 weeks). The therapy groups include the following treatment: motor imagery with music stimulation (30 min, group 1); motor imagery with music stimulation plus gait training with music stimulation (15 & 15 min, group 2); gait training with music stimulation (30 min, group 3). You will also be informed how to use the electronic study files containing music and guidance. The file consists of 4 parts, so you will



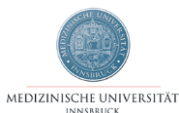

RIGMUC

PIS\_ICF, Version 1.1 of 28.11.2020

receive new training instructions and a new motor imagery and/or gait with music every week. After each week you will receive a call from your therapist for support. If you have any questions or problems, you can also contact your therapist between these phone calls at any time. Four weeks after this therapy period, you will also receive a call from your therapist to ask how you are.

You will be asked to travel to the Clinical Department of Neurology at the Medical Universities of Innsbruck and Graz or the Rehabilitation Centre in Münster for a total of three visits. Adhering to appointments and instructions from the study physician is critical to the success of this clinical trial.

### **3. What are the benefits of participating in the clinical study?**

Based on previous studies, it can be assumed that you will derive direct health benefits from participating in this clinical study. Since these are new therapy interventions, a direct benefit cannot be predicted with certainty. The purpose of this study is to compare three physiotherapy measures to determine whether there is any benefit to a particular therapy.

By participating in this study, you are helping to gain new knowledge about the targeted treatment of patients with MS.

### **4. Are there any risks, complaints and side effects?**

Performing the examinations and home therapy can trigger adverse events and side effects. But this is very unlikely. A short-term increased tiredness can occur or pre-existing balance deficits can be intensified for a short time. It is assumed that falls can occur in rare cases, but that they can also occur outside of the study in daily life in MS patients with a physical impairment. In order to keep the risk of falling as low as possible, you will receive appropriate instructions from the study team.

The travel to the Medical University of Innsbruck or Graz or the Rehabilitation Centre Münster for the study visits, the physical examination and the collection of the assessment scores represent a small additional burden.

### **5. Additional medication intake?**

Please discuss treatments and therapies outside of the study with your study investigator.

### **6. What should be done if symptoms, side effects and/or injuries occur?**

Should any symptoms, side effects or injuries occur in the course of the clinical study, we ask you to inform your study doctor about them, in the case of serious side effects immediately, if necessary by telephone (telephone numbers and other contact details see below).

### **7. Insurance**

As a participant in this clinical study, you have the legally required indemnity insurance coverage that covers all damage to your life or health that may be caused by the clinical

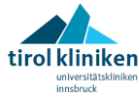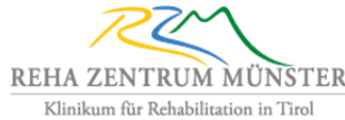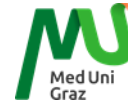

RIGMUC

PIS\_ICF, Version 1.1 of 28.11.2020

study measures, with the exception of damage due to changes in the genetic material in germline cells.

The insurance has been taken out for you at Zürich Versicherungs-Aktiengesellschaft, Schwarzenbergplatz 15, A-1010 Vienna, phone.: 0800 0808080, policy number 07225462-7. If you wish, you can inspect the insurance documents.

In the event of damage, you can contact the insurer directly and make your own claims. Austrian law applies to the insurance contract. Any insurance claims are enforceable in Austria.

You can also contact the patient representative for support.

In order to not endanger the insurance cover

- You may only undergo other medical treatment during your participation in this clinical study with the consent of your treating study doctor (with the exception of emergencies). This also applies to taking additional medication or participating in another study.
- you need to immediately notify the attending study doctor or the above-mentioned insurance company of any damage to your health occurs that could be a result of this clinical study.
- you need to do everything reasonable to clarify the cause, course and consequences of the insured event and to keep the damage to a minimum. This may also include authorising your treating doctor to provide information requested by the insurer.

Please note that the insurance does not provide cover for an accident that occurs to you on your way to and from the study.

## 8. When will the clinical trial be prematurely terminated?

You can revoke your willingness to participate and withdraw from the clinical study at any time without giving reasons, without incurring any disadvantages for your further medical care.

Your study doctor will inform you immediately of any new information that becomes known in relation to this clinical study and that could become material to you. On this basis, you can reconsider your decision to continue participating in this clinical study.

However, it is also possible that your study doctor may decide to terminate your participation in the clinical trial prematurely without first obtaining your consent. The reasons for this can be:

- a) You cannot meet the requirements of the clinical study.
- b) Your study doctor has the impression that your further participation in the clinical study is not in your interest.

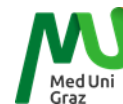

RIGMUC

PIS\_ICF, Version 1.1 of 28.11.2020

## 9. Data protection

As part of this clinical study, data about you will be collected and processed. There is a fundamental distinction between

- 1) those personal data by which a person can be directly identified (e.g., name, date of birth, address, social security number, images, ...).
- 2) Pseudonymised personal data i.e., data in which all information is removed that allows directly draw conclusions about a specific person, or replaced by a code (e.g., a number) or made illegible (e.g., in the case of pictures). Despite compliance with these measures, it cannot be completely ruled out that inadmissible re-identification occurs.
- 3) Anonymised data that cannot be traced back to the specific person.

The study doctor and other employees of the study centre who are involved in the clinical study or your medical care have access to the data by which you can be directly identified (see point 1). In addition, authorised representatives of the sponsor Medical University of Innsbruck, as well as representatives of national and/or international health authorities and the respective responsible ethics committees can inspect these data insofar as this is necessary or prescribed for the verification of the proper conduct of the clinical study. All persons who have access to this data are subject to the respective applicable national data protection regulations and/or the EU Data Protection Law (DSGVO) when handling the data.

The code that enables the pseudonymised data to be assigned to you will only be stored at your study centre.

Only the pseudonymised or anonymised data will be used for any publications.

In the context of this clinical study, no data will be transferred to countries outside the EU (third countries).

Your consent form is the legal basis for the processing of your personal data. You can revoke your consent to the collection and processing of your data at any time without giving a reason. After your revocation, no further data will be collected about you. The data collected up to the point of revocation can, however, continue to be processed in the context of this clinical study.

According to the DSGVO, you have the right to information, correction, deletion, restriction of processing, data portability and objection, as long as this does not make the aims of the clinical study impossible or seriously impaired and unless other legal regulations contradict this.

The expected overall duration of the clinical study is 26 months. The duration of the storage of your data beyond the end or termination of the clinical study is regulated by legal provisions.

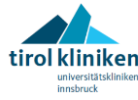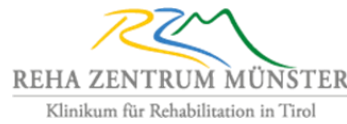

RIGMUC

PIS\_ICF, Version 1.1 of 28.11.2020

If you have any questions about the handling of your data in this clinical study, please contact your study doctor first. If necessary, they can forward your request to the persons responsible for data protection.

Contact details of the data protection officers of the institutions involved in this clinical study:

- Data protection officer of the Medical University of Innsbruck: datenschutzbeauftragter@i-med.ac.at
- Data protection officer of the Tirol Kliniken: datenschutzbeauftragte@tirol-kliniken.at
- Data protection officer of the Rehabilitation Centre Münster: datenschutz@reha-muenster.at
- Data protection officer of the Medical University of Graz: datenschutz@medunigraz.at, datenschutz@kages.at
- You have the right to lodge a complaint with the Austrian data protection authority about the handling of your data ([www.dsb.gv.at](http://www.dsb.gv.at); E-mail: [dsb@dsb.gv.at](mailto:dsb@dsb.gv.at))

### 10. Are there any costs for the participants? Is there a reimbursement or compensation?

No additional costs will be incurred for you by participating in this clinical study. Unfortunately, we cannot reimburse you for any travel costs that may arise. You will not receive any financial compensation for your participation in this study.

### 11. Opportunity to discuss further questions

Your study doctor and his staff will answer any further questions you may have in connection with this clinical study. We will also answer any questions you may have about your rights as a patient and participant in this clinical study.

|                                                                                      |            |
|--------------------------------------------------------------------------------------|------------|
| <b>Clinical Department of Neurology, Medical University of Innsbruck,</b> [REDACTED] |            |
| [REDACTED]                                                                           | [REDACTED] |
| <b>Rehabilitation Centre Münster,</b> [REDACTED]                                     |            |
| [REDACTED]                                                                           | [REDACTED] |
| [REDACTED]                                                                           | [REDACTED] |



RIGMUC

PIS\_ICF, Version 1.1 of 28.11.2020

|                                                                        |            |
|------------------------------------------------------------------------|------------|
| <b>Department of Neurology, Medical University of Graz,</b> [REDACTED] |            |
| [REDACTED]                                                             |            |
| [REDACTED]                                                             | [REDACTED] |
| [REDACTED]                                                             | [REDACTED] |

If you have any questions about the informed consent, you can also contact the Tyrolean patient representative:

[REDACTED]

[REDACTED]

[REDACTED]

[REDACTED]

Tel.: [REDACTED]

Fax: [REDACTED]

Email: [REDACTED]

WWW: <http://www.tirol.gv.at/patientenvertretung>

## 12. Informed Consent Form

Name of the patient: .....

Date of birth: .....

I agree to take part in the clinical study „Effects of actual and imagined music-cued gait training on motor functioning and brain activity in people with multiple sclerosis: protocol of a randomised parallel multicentre trial“ (short: RIGMUC). I have been informed that I can refuse participation without any negative consequences, in particular for my medical care.

I have been informed by Ms / Mr (MD) ..... in detail and understandably about the clinical study, possible burdens and risks, as well as about the type, meaning and scope of the clinical study and the requirements resulting for me. I have also read the text of this patient information and informed consent, which comprises a total of 8 [10] pages. Questions that arose were answered comprehensibly and satisfactorily by the study doctor. I had enough time to make up my mind. At the moment, I do not have any further questions.

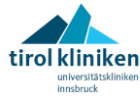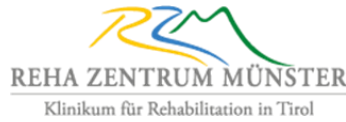

RIGMUC

PIS\_ICF, Version 1.1 of 28.11.2020

I will comply with the medical instructions required to carry out the clinical study, but I reserve the right to terminate my voluntary participation at any time without incurring any disadvantages, in particular for my medical care.

I particularly agree that my data collected as part of this clinical study will be processed as described in the "Data Protection" section of this document. Should I withdraw or be excluded from the study, I agree that my data are continued to be stored and analysed as described in this information.

Yes  No

I have received a copy of this patient information and informed consent. The original remains with the study doctor.

.....

(Date and signature of the patient)

.....

(Date, name and signature of the responsible study doctor)

(The patient receives a signed copy of the patient information and informed consent, the original remains with the study doctor's folder.)

For peer review only

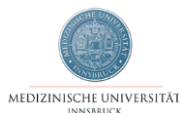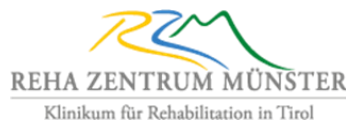

RIGMUC

PIS\_ICF, Version 1.1 of 28.11.2020

## Protocol RIGMUC, Version 1.1 of 14.11.2020

### ***Patient Information Sheet and Informed Consent Form for participation in the clinical study***

#### **Effects of actual and imagined music-cued gait training on motor functioning and brain activity in people with multiple sclerosis: protocol of a randomised parallel multicentre trial (RIGMUC)**

#### **Additional information for Centre 3 only (Department of Neurology, Medical University of Graz)**

#### **Magnet Resonance Imaging (MRI)**

##### **MRI:**

Idiopathic inflammatory, demyelinating diseases of the central nervous system (CNS), such as multiple sclerosis in particular, are caused by inflammation in the area of the nerve sheaths in the brain and spinal cord. Investigations such as magnetic resonance imaging (MRI) are needed to better understand the condition that you are suspected of having or have been diagnosed with. Multiple sclerosis is a disease in which there are foci of the disease at different times, in different places in the brain and spinal cord. MRI has been an examination method that has been used for years, which provides images of these changes in the brain and spinal cord without exposure to radiation. In the planned examinations using a 3-Tesla MRI device, the relatively new examination techniques, including functional MRI (fMRI), are to be used in order to obtain information about the function of the brain that goes beyond the nature and structure.

##### **1. A) How does the MRI investigation work?**

This clinical study will be carried out at the Department of Neurology, Medical University of Graz, and a total of 36 people with MS and 15 healthy people are expected to take part.

The examinations are carried out at the Department of Neuroradiology at the LKH University Hospital Graz. An MRI machine is an elongated tube that creates a magnetic field. The process uses **neither ionising radiation nor radioactive substances and is therefore not associated with any radiation exposure**. Rather, the images are created by signals from water particles in the body, which are generated with the help of a strong magnet and high-frequency pulses (radio waves).

**This technology is used worldwide and, according to the current state of knowledge, is completely harmless to the human organism and free of biological risks.**

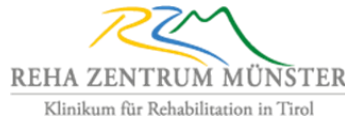

RIGMUC

PIS\_ICF, Version 1.1 of 28.11.2020

During the investigation you lie on your back, whereby a special mirror device allows you to look out of the tube (e.g., at an image projection). We also have "eye contact" with you via a camera. Verbal communication can take place via an intercom. In addition, you will be given an alarm button ("signal ball") with which you can indicate that the examination should be stopped immediately if you feel uncomfortable for any reason. The examination itself is relatively loud, which is why we will protect your hearing with headphones. During the exam, you should keep your head as still as possible.

However, if you are known to suffer from claustrophobia, you should not participate in this study.

As part of the MRI examination, the structure and function (using functional magnetic resonance tomography (fMRI for short) of your brain are precisely recorded. With this study, we want to investigate the way in which the brain reacts to changes in tissue function, such as those in the context of your disease can occur, reacts or tries to limit their consequences. During the fMRI examination you will be asked to perform certain movements, look at pictures or solve tasks. We will rehearse the processes that you are supposed to carry out during the fMRI examination together with you before the actual examination outside of the MRT machine.

With the help of this technology, we receive images on which parts of the brain "light up" that are activated during such tasks. However, do not expect to receive conventional radiological findings from this examination. **No contrast agent** is required for the fMRI examination. The total duration of the MRI examination is approx. 30 minutes.

### 3. Are there any risks, burdens and side effects?

If the following safety measures are observed, no harmful effects are to be expected:

Since a strong magnetic field is generated by the MRI machine, interference from pacemakers or heat build-up or relocation of metal parts in the body can occur. If one of these circumstances could apply (for example the presence of a pacemaker or metal parts in the body, such as metal clips after operations on the brain or after old injuries, especially in the eye area, etc.), you cannot participate in this study. This also applies to pregnancy. If you have any questions, we will of course be happy to answer any further questions you may have.

If you change your mind, you can of course revoke your consent at any time without giving reasons, without incurring any disadvantages.



### Supplemental File 3

#### 1. List of semi-structured questions for telephone support interviews once weekly during the intervention period

| No | Question                                                                                                                                                                                                                                                                                                                                                                                                                                            |
|----|-----------------------------------------------------------------------------------------------------------------------------------------------------------------------------------------------------------------------------------------------------------------------------------------------------------------------------------------------------------------------------------------------------------------------------------------------------|
| 1  | <p>Please tell me how often you practice music-supported walking / motor imagery per week.</p> <p>[If not 4x a week:]</p> <p>Who or what keeps you from attending the walking training programme?</p> <p>Who or what supports you in attending the walking training programme?</p>                                                                                                                                                                  |
| 2  | <p>Tell me how long you practice music-supported walking / motor imagery per session?</p> <p>[If not 30 minutes per session:]</p> <p>Who or what keeps you from practicing for 30 minutes per session?</p> <p>Who or what would support you in practising 30 minutes per session?</p>                                                                                                                                                               |
| 3  | <p>Could you please share your experiences with the music-supported walking / motor imagery?</p> <p>[If the participant reports any problems:]</p> <p>Can you explain this in more detail for me?</p> <p>Can you give me reasons for that?</p> <p>What do you feel as the easiest part about the music-supported walking / motor imagery?</p> <p>What do you feel as the most difficult part about the music-supported walking / motor imagery?</p> |
| 4  | <p>Are you using the compliance checklist for documentation (practiced / not practiced)?</p> <p>[If not:] Can you give me reasons for that?</p> <p>Who or what could support you in completing the checklist?</p>                                                                                                                                                                                                                                   |

|                              |                                                                                                                                                                                                                                                                                                                                                |
|------------------------------|------------------------------------------------------------------------------------------------------------------------------------------------------------------------------------------------------------------------------------------------------------------------------------------------------------------------------------------------|
| 5                            | <p>Did you experience a fall within the study period?</p> <p>[If so:] How often did you fall?</p> <p>Could you please describe under what circumstances the fall(s) occurred?</p> <p>Are you using the fall protocol?</p> <p>[If not:] Can you give me reasons for that?</p> <p>Who or what could support you in completing the checklist?</p> |
| Thank you for the interview! |                                                                                                                                                                                                                                                                                                                                                |

## 2. List of semi-structured questions for follow-up telephone interviews at 4-weeks post-intervention

| No | Question                                                                                                                                       |
|----|------------------------------------------------------------------------------------------------------------------------------------------------|
| 1  | Could you please describe your health since the end of the music-supported walking / motor imagery practice?                                   |
| 2  | Tell me about how your walking has been in the last few weeks compared to before the music-supported walking / motor imagery practice.         |
| 3  | How did you experience your fatigue / tiredness in the last few weeks compared to before the music-supported walking / motor imagery practice? |
| 4  | Please describe your present health as compared to before the music-supported walking / motor imagery practice.                                |
| 5  | How should the homebased music-supported walking / motor imagery programme be for you to recommend it to others?                               |
| 6  | Can you please share your thoughts on how we could improve the music-supported walking / motor imagery programme?                              |
| 7  | What should the homebased music-supported walking / motor imagery programme be like that you would carry it out for a longer period of time?   |
| 8  | Did you fall in the past 4 weeks?                                                                                                              |

|    |                                                                          |
|----|--------------------------------------------------------------------------|
| 1  |                                                                          |
| 2  |                                                                          |
| 3  | [If so:] How often did you fall?                                         |
| 4  |                                                                          |
| 5  | Could you please describe under what circumstances the fall(s) occurred? |
| 6  |                                                                          |
| 7  | Are you using the fall protocol?                                         |
| 8  |                                                                          |
| 9  | [If not:] Can you give me reasons for that?                              |
| 10 |                                                                          |
| 11 | Who or what could support you in completing the checklist?               |
| 12 |                                                                          |
| 13 |                                                                          |
| 14 | Thank you for the interview!                                             |
| 15 |                                                                          |

16

17

18

19

20

21

22

23

24

25

26

27

28

29

30

31

32

33

34

35

36

37

38

39

40

41

42

43

44

45

46

47

48

49

50

51

52

53

54

55

56

57

58

59

60

For peer review only
