# Supplementary material for: Effects of actual and imagined music-cued gait training on motor functioning and brain activity in people with multiple sclerosis: protocol of a randomised parallel multicentre trial
Source: PubMed Central journal article supplement — BMJ Open. 2022 Feb 7;12(2):e056666. doi: 10.1136/bmjopen-2021-056666 (PMC8823210; doi:10.1136/bmjopen-2021-056666), 2022-02-07
Supplement: bmjopen-2021-056666supp004.pdf [file bmjopen-2021-056666supp004.pdf]

**Table 1** Intervention chart

| ITEM NO                 | ITEM DESCRIPTION                                                                                                                                                                                                                                                                               |                                                                |                                                         |
|-------------------------|------------------------------------------------------------------------------------------------------------------------------------------------------------------------------------------------------------------------------------------------------------------------------------------------|----------------------------------------------------------------|---------------------------------------------------------|
| <b>1 BRIEF NAME</b>     | <b>Group 1</b>                                                                                                                                                                                                                                                                                 | <b>Group 2</b>                                                 | <b>Group 3</b>                                          |
|                         | Motor imagery (MI) with music-, metronome- and verbal cueing                                                                                                                                                                                                                                   | MI and gait training with music-, metronome- and verbal cueing | Gait training with music-, metronome- and verbal cueing |
|                         | Music accentuated by metronome cues and intermittent concise verbal cueing                                                                                                                                                                                                                     |                                                                |                                                         |
| <b>2 WHY</b>            | <ul style="list-style-type: none"> <li>- PETTLEP (Physical, Environment, Task, Timing, Learning, Emotion, Perspective) approach to MI (Holmes and Collins 2001)<sup>1</sup></li> <li>- Rhythmic-auditory stimulation (cueing) for gait training (Thaut 2007)<sup>2</sup></li> </ul>            |                                                                |                                                         |
| <b>3 WHAT MATERIALS</b> | <ul style="list-style-type: none"> <li>- Dropbox link including the audio mix and download to smartphone, laptop, tablet or MP3-player, or study CDs in group 1</li> <li>- 4 sessions in each audiomix, one for each week</li> <li>- Headphones or earphones may be used if desired</li> </ul> |                                                                |                                                         |
| <b>Audiomix Content</b> | - Kinaesthetic MI instructions                                                                                                                                                                                                                                                                 | - Kinaesthetic MI and gait training instructions               | - Gait training instructions                            |

|                          |                                                                                                                                                                                                                                                                                                                                                                                                                                            |                                                                                                                                                                                                        |                                                                           |
|--------------------------|--------------------------------------------------------------------------------------------------------------------------------------------------------------------------------------------------------------------------------------------------------------------------------------------------------------------------------------------------------------------------------------------------------------------------------------------|--------------------------------------------------------------------------------------------------------------------------------------------------------------------------------------------------------|---------------------------------------------------------------------------|
|                          | <ul style="list-style-type: none"> <li>- Instrumental music in 2/4 or 4/4 metre</li> <li>- Beat-accentuating metronome cues</li> <li>- Intermittent verbal cueing (e.g., “toe-off” or “step-step”)</li> <li>- Weekly change of music titles</li> <li>- Gradual increase in tempo</li> </ul>                                                                                                                                                |                                                                                                                                                                                                        |                                                                           |
| <b>4 WHAT PROCEDURES</b> | - Introduction to cued MI, familiarisation and training                                                                                                                                                                                                                                                                                                                                                                                    | - Introduction to MI and gait training with cueing, familiarisation and training                                                                                                                       | - Introduction to gait training with cueing, familiarisation and training |
|                          | <ul style="list-style-type: none"> <li>- In lay language; description of the concept of MI; its application in sports and neurorehabilitation; MI perspectives (internal and external) and modes (visual, kinaesthetic).</li> <li>- Measurement of actual and imagined walking duration over a 6-metre distance to monitor the mental process</li> <li>- Performance feedback for participants and repeated training if desired</li> </ul> |                                                                                                                                                                                                        |                                                                           |
|                          |                                                                                                                                                                                                                                                                                                                                                                                                                                            | <ul style="list-style-type: none"> <li>- In lay language; description of the concept of cued gait training and sensorimotor interaction; its application in sports and neurorehabilitation;</li> </ul> |                                                                           |

|                            |                                                                                                                                                                                                                                                                                |                                                                                                                                                                                                                                                                                    |
|----------------------------|--------------------------------------------------------------------------------------------------------------------------------------------------------------------------------------------------------------------------------------------------------------------------------|------------------------------------------------------------------------------------------------------------------------------------------------------------------------------------------------------------------------------------------------------------------------------------|
|                            |                                                                                                                                                                                                                                                                                | <p>gait synchronisation with the music/metronome beat; musical tempo modulations.</p> <ul style="list-style-type: none"> <li>- Additional introduction to rhythmic auditory stimulation plus its use in neurorehabilitation</li> <li>- Rhythmic-cued MI familiarisation</li> </ul> |
|                            | <ul style="list-style-type: none"> <li>- Weekly phone calls for training support, adherence and adverse events reports</li> <li>- Phone calls at 4-week follow-up for feedback</li> </ul>                                                                                      |                                                                                                                                                                                                                                                                                    |
| <b>PETTLEP Elements</b>    |                                                                                                                                                                                                                                                                                | <b>Rhythmic-cued gait training</b>                                                                                                                                                                                                                                                 |
| <b>Position (Physical)</b> | <ul style="list-style-type: none"> <li>- Practise at any time of the day when alert</li> <li>- Seated in an upright body position</li> <li>- Shoulders relaxed</li> <li>- Avoid tightening the muscles or moving</li> <li>- Eyes closed</li> <li>- Normal breathing</li> </ul> |                                                                                                                                                                                                                                                                                    |
|                            |                                                                                                                                                                                                                                                                                | <ul style="list-style-type: none"> <li>- Practice at any time of the day when alert</li> <li>- Use of headphones or earplugs if desired</li> <li>- Walking on a hallway (indoors) and/or familiar straight path (outdoors)</li> </ul>                                              |

|                             |                                                                                                                                                                                                                                                                                                                                                                                                                                                                                                                          |                                                                                                                                                                                                                                                                                                                        |
|-----------------------------|--------------------------------------------------------------------------------------------------------------------------------------------------------------------------------------------------------------------------------------------------------------------------------------------------------------------------------------------------------------------------------------------------------------------------------------------------------------------------------------------------------------------------|------------------------------------------------------------------------------------------------------------------------------------------------------------------------------------------------------------------------------------------------------------------------------------------------------------------------|
|                             |                                                                                                                                                                                                                                                                                                                                                                                                                                                                                                                          | <ul style="list-style-type: none"> <li>- Adjusting one's steps with the music or metronome beat (every second music beat)</li> <li>- Use of walking sticks if required for reasons of safety</li> <li>- Avoid using walking sticks with balance related tasks if safe</li> <li>- Periods of rest as desired</li> </ul> |
| <b>Environment</b>          | <ul style="list-style-type: none"> <li>- Practice in a quiet place at home</li> <li>- Imagine walking indoors (e.g., a long hallway) and walking outdoors (on a straight and familiar path)</li> </ul>                                                                                                                                                                                                                                                                                                                   |                                                                                                                                                                                                                                                                                                                        |
| <b>Tasks for all groups</b> | <ul style="list-style-type: none"> <li>- Take long/giant strides</li> <li>- Take extremely slow/small and quick strides</li> <li>- Touch the ground with your heels first</li> <li>- Roll your feet on the ground and feel your body weight on your soles</li> <li>- Toe-off</li> <li>- Raise your knees</li> <li>- Pace elegantly and upright like a queen/king</li> <li>- Place/feel your weight on your feet/legs</li> <li>- - Feel the swinging of your arms while walking/swing your arms during walking</li> </ul> |                                                                                                                                                                                                                                                                                                                        |

|                                                    |                                                                                                                                                                                                                          |                                                                                                                                                                                                                                            |
|----------------------------------------------------|--------------------------------------------------------------------------------------------------------------------------------------------------------------------------------------------------------------------------|--------------------------------------------------------------------------------------------------------------------------------------------------------------------------------------------------------------------------------------------|
|                                                    | <ul style="list-style-type: none"> <li>- Stamp your feet while walking, walk forcefully and energetically</li> <li>- Walk effortlessly, feeling lightly</li> <li>- Take wide/narrow steps</li> </ul>                     |                                                                                                                                                                                                                                            |
| <b>Timing of the MI and gait training</b>          | External timing is provided: “imagine yourself walking in time with the music or metronome and verbal cues”                                                                                                              |                                                                                                                                                                                                                                            |
|                                                    |                                                                                                                                                                                                                          | External timing is provided: “walk in time with the music or metronome and verbal cues”                                                                                                                                                    |
|                                                    | <ul style="list-style-type: none"> <li>- Tempo (cadence) is between 80 and 120 steps/minute</li> <li>- Slow, medium and fast music pieces alternate, with a gradual progression in the tempo over the 4 weeks</li> </ul> |                                                                                                                                                                                                                                            |
| <b>Learning</b>                                    | <ul style="list-style-type: none"> <li>- See familiarisation</li> <li>- Weekly phone call support is provided</li> </ul>                                                                                                 |                                                                                                                                                                                                                                            |
| <b>Emotion related to the MI and gait training</b> | <ul style="list-style-type: none"> <li>- MI instructions include motivational and arousal enhancing aspects. See instructions under Tasks.</li> <li>- Motivational instrumental music is used with the MI</li> </ul>     |                                                                                                                                                                                                                                            |
|                                                    |                                                                                                                                                                                                                          | <ul style="list-style-type: none"> <li>- Gait training instructions include motivational and arousal enhancing aspects. See instructions under Tasks.</li> <li>- Motivational instrumental music is used with the gait training</li> </ul> |

|                                   |                                                                                                                                                                                                                                                                                                                                                                                                                                                                                                                                                                                                                      |                                                                                                                                                                                                                        |
|-----------------------------------|----------------------------------------------------------------------------------------------------------------------------------------------------------------------------------------------------------------------------------------------------------------------------------------------------------------------------------------------------------------------------------------------------------------------------------------------------------------------------------------------------------------------------------------------------------------------------------------------------------------------|------------------------------------------------------------------------------------------------------------------------------------------------------------------------------------------------------------------------|
| <b>Perspective</b>                | Kinaesthetic MI from an internal, first-person perspective                                                                                                                                                                                                                                                                                                                                                                                                                                                                                                                                                           | No MI                                                                                                                                                                                                                  |
| <b>5 WHO PROVIDES</b>             | <ul style="list-style-type: none"> <li>- The audiomix was created by the lead researcher (BS), an experienced neurological physiotherapist with 11 years of musical training and a PhD in physiotherapy.</li> <li>- The introduction, familiarisation and training is provided by neurological physiotherapists, occupational therapists and psychologists who received a structured and specific training by the lead researcher</li> <li>- All therapist researchers are supervised and supported by the lead researcher</li> <li>- Any intervention related processes are documented by the study team</li> </ul> |                                                                                                                                                                                                                        |
| <b>6 HOW – all delivery modes</b> | <ul style="list-style-type: none"> <li>- MI introduction, familiarisation and training: individually</li> <li>- Monitoring of mental process: individually</li> </ul>                                                                                                                                                                                                                                                                                                                                                                                                                                                |                                                                                                                                                                                                                        |
|                                   |                                                                                                                                                                                                                                                                                                                                                                                                                                                                                                                                                                                                                      | <ul style="list-style-type: none"> <li>- Cued gait training introduction, familiarisation and training: individually</li> <li>- Monitoring of understanding of gait synchronisation with beat: individually</li> </ul> |
|                                   | <ul style="list-style-type: none"> <li>- Weekly phone calls: individually</li> </ul>                                                                                                                                                                                                                                                                                                                                                                                                                                                                                                                                 |                                                                                                                                                                                                                        |
| <b>7 WHERE</b>                    | <ul style="list-style-type: none"> <li>- MI introduction, familiarisation, training and monitoring of mental process: at Medical University of Innsbruck (Centre 1) or Graz (Centre 3), Clinical Department of Neurology or Rehab Centre Münster (Centre 2), Austria</li> </ul>                                                                                                                                                                                                                                                                                                                                      |                                                                                                                                                                                                                        |

|                            |                                                                                                                                                                                                                                                                                                                                                                                                                                                                                                                       |                                                                                                                                                                                                                 |                                         |
|----------------------------|-----------------------------------------------------------------------------------------------------------------------------------------------------------------------------------------------------------------------------------------------------------------------------------------------------------------------------------------------------------------------------------------------------------------------------------------------------------------------------------------------------------------------|-----------------------------------------------------------------------------------------------------------------------------------------------------------------------------------------------------------------|-----------------------------------------|
|                            |                                                                                                                                                                                                                                                                                                                                                                                                                                                                                                                       | - Cued gait training introduction, familiarisation and training: at Medical University of Innsbruck (Centre 1) or Graz (Centre 3), Clinical Department of Neurology or Rehab Centre Münster (Centre 2), Austria |                                         |
|                            | - Cued MI practice: at participants' homes                                                                                                                                                                                                                                                                                                                                                                                                                                                                            |                                                                                                                                                                                                                 |                                         |
|                            | Cued gait training: at participants' homes                                                                                                                                                                                                                                                                                                                                                                                                                                                                            |                                                                                                                                                                                                                 |                                         |
| <b>8 WHEN AND HOW MUCH</b> | 30 minutes, 6 times a week, for 4 weeks                                                                                                                                                                                                                                                                                                                                                                                                                                                                               | 15 & 15 minutes, 6 times a week, for 4 weeks                                                                                                                                                                    | 30 minutes, 6 times a week, for 4 weeks |
| <b>9 TAILORING</b>         | Same intervention for all participants                                                                                                                                                                                                                                                                                                                                                                                                                                                                                | Same intervention for all participants                                                                                                                                                                          | Same intervention for all participants  |
| <b>10 MODIFICATIONS</b>    | No modifications                                                                                                                                                                                                                                                                                                                                                                                                                                                                                                      | No modifications                                                                                                                                                                                                | No modifications                        |
| <b>11 HOW WELL PLANNED</b> | <ul style="list-style-type: none"> <li>- Intervention adherence is assessed using a participant diary and also during weekly phone calls and at post-intervention</li> <li>- Support to intervention adherence is performed by the researchers who instruct participants (guidance and motivation)</li> <li>- Recording in structured support call logs is performed by the researchers who instruct participants</li> <li>- Recording in excel sheets is performed in excel sheets by the lead researcher</li> </ul> |                                                                                                                                                                                                                 |                                         |

|                               |                                                                         |
|-------------------------------|-------------------------------------------------------------------------|
| <b>12 HOW WELL<br/>ACTUAL</b> | This is a study protocol and the adherence rates are not yet available. |
|-------------------------------|-------------------------------------------------------------------------|

### References

1. Holmes PS, Collins DJ. The PETTLEP approach to motor imagery: A functional equivalence model for sport psychologists. *J Appl Sport Psychol* 2001;13(1):60-83.
2. Thaut MH. Rhythm, music and the brain. Scientific foundations and clinical applications. New York: Routledge 2007:272.
