# Supplementary material for: Effects of actual and imagined music-cued gait training on motor functioning and brain activity in people with multiple sclerosis: protocol of a randomised parallel multicentre trial
Source: PubMed Central journal article supplement — BMJ Open. 2022 Feb 7;12(2):e056666. doi: 10.1136/bmjopen-2021-056666 (PMC8823210; doi:10.1136/bmjopen-2021-056666), 2022-02-07
Supplement: bmjopen-2021-056666supp005.pdf [file bmjopen-2021-056666supp005.pdf]

### Supplemental File 3

#### 1. List of semi-structured questions for telephone support interviews once weekly during the intervention period

| No | Question                                                                                                                                                                                                                                                                                                                                                                                                                                            |
|----|-----------------------------------------------------------------------------------------------------------------------------------------------------------------------------------------------------------------------------------------------------------------------------------------------------------------------------------------------------------------------------------------------------------------------------------------------------|
| 1  | <p>Please tell me how often you practice music-supported walking / motor imagery per week.</p> <p>[If not 4x a week:]</p> <p>Who or what keeps you from attending the walking training programme?</p> <p>Who or what supports you in attending the walking training programme?</p>                                                                                                                                                                  |
| 2  | <p>Tell me how long you practice music-supported walking / motor imagery per session?</p> <p>[If not 30 minutes per session:]</p> <p>Who or what keeps you from practicing for 30 minutes per session?</p> <p>Who or what would support you in practising 30 minutes per session?</p>                                                                                                                                                               |
| 3  | <p>Could you please share your experiences with the music-supported walking / motor imagery?</p> <p>[If the participant reports any problems:]</p> <p>Can you explain this in more detail for me?</p> <p>Can you give me reasons for that?</p> <p>What do you feel as the easiest part about the music-supported walking / motor imagery?</p> <p>What do you feel as the most difficult part about the music-supported walking / motor imagery?</p> |
| 4  | <p>Are you using the compliance checklist for documentation (practiced / not practiced)?</p> <p>[If not:] Can you give me reasons for that?</p> <p>Who or what could support you in completing the checklist?</p>                                                                                                                                                                                                                                   |

|                              |                                                                                                                                                                                                                                                                                                                                                |
|------------------------------|------------------------------------------------------------------------------------------------------------------------------------------------------------------------------------------------------------------------------------------------------------------------------------------------------------------------------------------------|
| 5                            | <p>Did you experience a fall within the study period?</p> <p>[If so:] How often did you fall?</p> <p>Could you please describe under what circumstances the fall(s) occurred?</p> <p>Are you using the fall protocol?</p> <p>[If not:] Can you give me reasons for that?</p> <p>Who or what could support you in completing the checklist?</p> |
| Thank you for the interview! |                                                                                                                                                                                                                                                                                                                                                |

## 2. List of semi-structured questions for follow-up telephone interviews at 4-weeks post-intervention

| No | Question                                                                                                                                       |
|----|------------------------------------------------------------------------------------------------------------------------------------------------|
| 1  | Could you please describe your health since the end of the music-supported walking / motor imagery practice?                                   |
| 2  | Tell me about how your walking has been in the last few weeks compared to before the music-supported walking / motor imagery practice.         |
| 3  | How did you experience your fatigue / tiredness in the last few weeks compared to before the music-supported walking / motor imagery practice? |
| 4  | Please describe your present health as compared to before the music-supported walking / motor imagery practice.                                |
| 5  | How should the homebased music-supported walking / motor imagery programme be for you to recommend it to others?                               |
| 6  | Can you please share your thoughts on how we could improve the music-supported walking / motor imagery programme?                              |
| 7  | What should the homebased music-supported walking / motor imagery programme be like that you would carry it out for a longer period of time?   |
| 8  | Did you fall in the past 4 weeks?                                                                                                              |

|                              |                                                                                                                                                                                                                                                                                      |
|------------------------------|--------------------------------------------------------------------------------------------------------------------------------------------------------------------------------------------------------------------------------------------------------------------------------------|
|                              | <p>[If so:] How often did you fall?</p> <p>Could you please describe under what circumstances the fall(s) occurred?</p> <p>Are you using the fall protocol?</p> <p>[If not:] Can you give me reasons for that?</p> <p>Who or what could support you in completing the checklist?</p> |
| Thank you for the interview! |                                                                                                                                                                                                                                                                                      |
