# Supplementary figures and images for: Effects of actual and imagined music-cued gait training on motor functioning and brain activity in people with multiple sclerosis: protocol of a randomised parallel multicentre trial
Source: PubMed Central journal article supplement — BMJ Open. 2022 Feb 7;12(2):e056666. doi: 10.1136/bmjopen-2021-056666 (PMC8823210; doi:10.1136/bmjopen-2021-056666), 2022-02-07

**CONSORT Flow Diagram (Extension to randomised pilot and feasibility trials; Eldridge et al., 2016)**

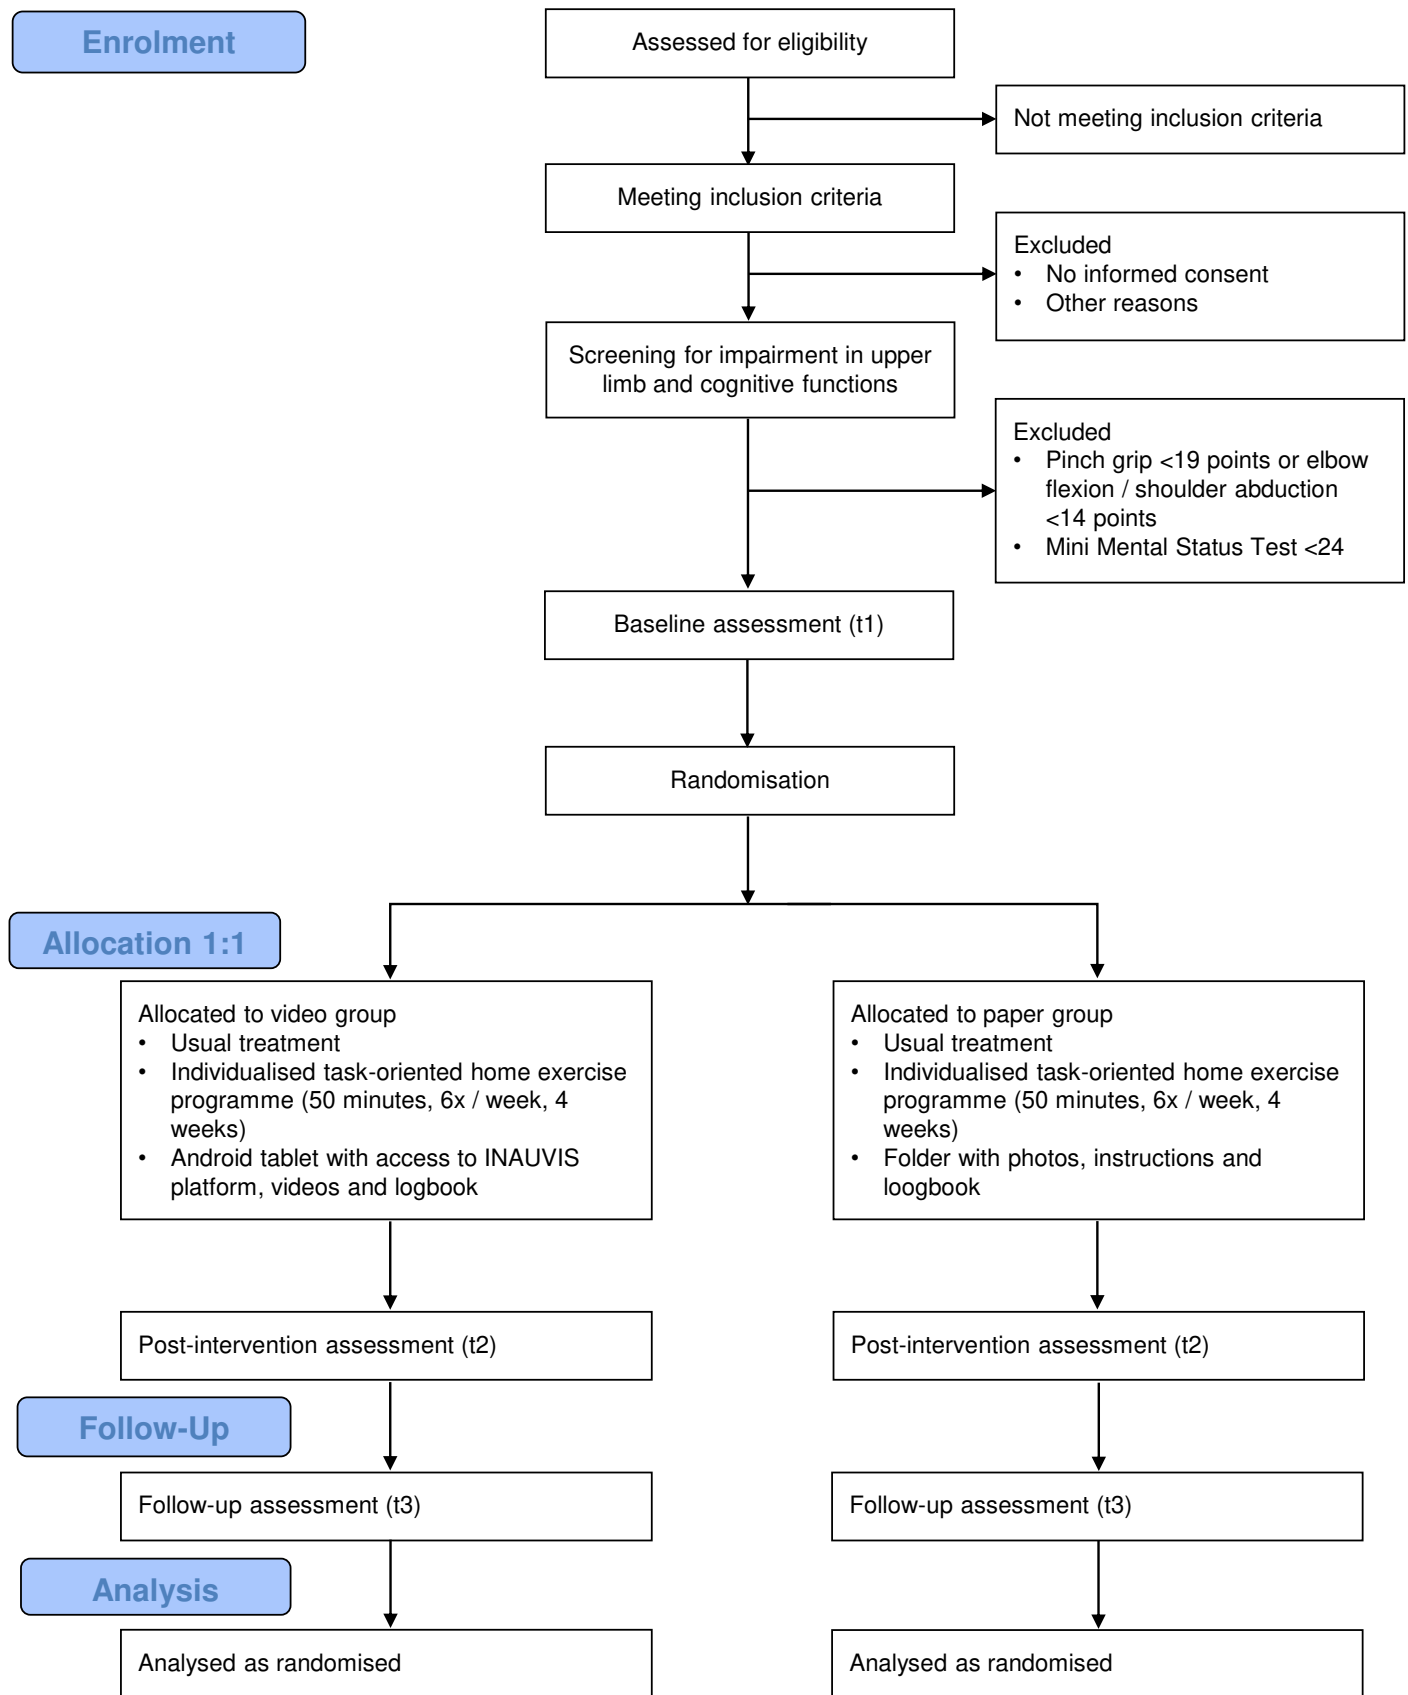

Supplement: bmjopen-2021-056666supp002.pdf [file bmjopen-2021-056666supp002.pdf]
